# Supplementary material for: Divergence in chondrogenic potential between in vitro and in vivo of adipose- and synovial-stem cells from mouse and human
Source: Stem Cell Res Ther. 2021 Jul 15;12:405. doi: 10.1186/s13287-021-02485-5 (PMC8281654; doi:10.1186/s13287-021-02485-5)
Supplement: Supplementary file 2 — Additional file 2. The information for immunohistochemistry. [file 13287_2021_2485_MOESM2_ESM.xlsx]

## Sheet: Sheet1
IHC antibodies
1st Antibodies
Target Antigen	Company	Catalog No.	Antigen Retrieval	1st Ab dilution	1st Ab reaction
COL1	CST	9144	Hyaluronidase (Sigma, 10 mg/mL), 37°C, 30 min	1/100	RT, 1hr
COL2	Kyowa Pharma Chemical	F-57	Protainase (Nichirei), 10 min	1/1000	RT, 1hr
COL3	Proteintech	22734-1-AP	(-)	1/4000	RT, 1hr
COL10	eBioscience	14-9771	Protainase (Nichirei), 10 min	1/1000	RT, 1hr
SOX9	CST	82630	(-)	1/300	4℃, O/N
Aggrecan	Proteintech	13880-1-AP	Hyaluronidase (Sigma, 10 mg/mL), 37°C, 30 min	1/500	RT, 1hr
pSmad1	abcam	ab73211	EDTA buffer pH 9.0 (abcam), 70°C, 30 min	1/100	4℃, O/N
pSmad2	abcam	ab188334	EDTA buffer pH 9.0 (abcam), 70°C, 30 min	1/100	4℃, O/N
hVimentin	abcam	ab16700	(-)	1/100	RT, 1hr
Perilipin	CST	3470	(-)	1/200	RT, 1hr
2nd Antibodies
Target Antigen	Company	Catalog No.	Condjugate	Reaction
Rabbit IgG	NICHIREI BIOSCIENCES	424144	HRP	RT, 30 min
Mouse IgG	NICHIREI BIOSCIENCES	424134	HRP	RT,30 min
Mouse IgG	NICHIREI BIOSCIENCES	414241	AP	RT, 30 min
