# Supplementary material for: Divergence in chondrogenic potential between in vitro and in vivo of adipose- and synovial-stem cells from mouse and human
Source: Stem Cell Res Ther. 2021 Jul 15;12:405. doi: 10.1186/s13287-021-02485-5 (PMC8281654; doi:10.1186/s13287-021-02485-5)
Supplement: Supplementary file 3 — Additional file 3. The information for qPCR primers. [file 13287_2021_2485_MOESM3_ESM.xlsx]

## Sheet: Sheet1
Gene Name	Accession ID		Primer sequence
Gapdh	NM_008084.3	F	AGGTCGGTGTGAACGGATTTG
		R	TGTAGACCATGTAGTTGAGGTCA
Col2a1	NM_031163.3	F	AAGGATGGCTGCACGAAACA
		R	CGGGAGGTCTTCTGTGATCG
Col1a1	NM_007742	F	GACGCATGGCCAAGAAGACA
		R	TACCTCGGGTTTCCACGTCT
Col10a1	NM_009925	F	GCTGAACGGTACCAAACGC
		R	TGCCTTGTTCTCCTCTTACTGG
Sox9	NM_011448	F	TGAAGAACGGACAAGCGGAG
		R	AGATTGCCCAGAGTGCTCG
Acan	NM_001361500.1	F	GCATGAGAGAGGCGAATGGA
		R	TCTTCTGCCCGAGGGTTCTA
Alk1	NM_001277259.1	F	GGAGAAACGGCGAGAGTTCA
		R	TGGTTCTCCTTGGTCCTTGC
Alk2	NM_001355049.1	F	CGCTTCAGACATGACCTCCA
		R	CCGAAGGCAGCTAACCGTAT
Alk3	NM_009758.4	F	GCTCCATGGCACTGGTATGA
		R	GCAAGGTATCCTCTGGTGCT
Alk4	NM_007395.4	F	TACGACTTAGTGCCCTCCGA
		R	GACATTGGGCCGTAGCTTCT
Alk5	NM_009370.3	F	GCTGCTGGAGTTAGGTGGTT
		R	TTGAAAGCCACACAAGCCCT
Alk6	NM_001277220.1	F	TGCTGGCACATTTCGTTTGG
		R	GGTTGGCCTGAGGAACATGA
Alk7	NM_001111030.1	F	TCCTCCTGGACCCAACACTT
		R	TCAGGCTGTGTGAACAGTCA
Tgfbr2	NM_009371.3	F	GCATCGCTCATCTCCACAGT
		R	AGAGCTCTTGAGGTCCCTGT
Bmpr2	NM_007561.4	F	GGCTTGCTGTAAAATGGTGC
		R	TGCTGACTCTATTGCAAAGTCTG
Bmp2	NM_007553.3	F	AAGTCAGTGGGAGAGCTTCG
		R	CATGGTTGGTGTGTCCCTGT
Bmp4	NM_001316360.1	F	CGGAAGCTAGGTGAGTTCGG
		R	AGAATCCCATCAGGGACGGA
Bmp6	NM_007556.3	F	GGTCGTGAGAGCTTGTGGTT
		R	CTTCGCTGTGCTGTTGTTCG
Bmp7	NM_007557.3	F	TTGCACCTGAAGGCTATGCT
		R	GGTTGGTGGCGTTCATGTAG
Tgfb1	NM_011577.2	F	CTCTTGAGTCCCTCGCATCC
		R	GAGCGCTCTCTGAGATCCAA
Tgfb3	NM_009368.3	F	ATCTGTTCCGGGCAGAGTTC
		R	ATTCTCTGCTCTGTGCGCTT
