# Supplementary material for: Divergence in chondrogenic potential between in vitro and in vivo of adipose- and synovial-stem cells from mouse and human
Source: Stem Cell Res Ther. 2021 Jul 15;12:405. doi: 10.1186/s13287-021-02485-5 (PMC8281654; doi:10.1186/s13287-021-02485-5)
Supplement: Supplementary file 17 — Additional file 17. Heatmaps for genes collected from several gene set related in TGFβ receptor signaling, Proteoglycan, and Chondrogenesis/Cartilage development were shown. [file 13287_2021_2485_MOESM17_ESM.xlsx]

## Sheet: Sheet1
Ensembl gene id	Gene name	Description	Donor1 hASCs	Donor2 hASCs	Donor5 hASCs	Donor1 hSSCs	Donor2 hSSCs	Donor5 hSSCs
ENSG00000000003	TSPAN6	tetraspanin 6	14.12	9.24	14.89	11.08	10.88	14.64
ENSG00000000005	TNMD	tenomodulin	0	0	0	0	0	0.15
ENSG00000000419	DPM1	dolichyl-phosphate mannosyltransferase subunit 1, catalytic	60.49	47.18	44.98	47.08	52.44	45.28
ENSG00000000457	SCYL3	SCY1 like pseudokinase 3	4.71	3.67	3.62	5.1	5.42	4.32
ENSG00000000460	C1orf112	chromosome 1 open reading frame 112	11.51	4.74	1.23	9.22	11.25	2.04
ENSG00000000938	FGR	FGR proto-oncogene, Src family tyrosine kinase	0.08	0.08	0	0.17	0	0.89
ENSG00000000971	CFH	complement factor H	31.79	39.01	46.25	49.84	42.95	39.52
ENSG00000001036	FUCA2	alpha-L-fucosidase 2	105.85	109.66	98.77	98.21	99.36	94.56
ENSG00000001084	GCLC	glutamate-cysteine ligase catalytic subunit	8	13.33	10.39	11.86	9.31	8.91
ENSG00000001167	NFYA	nuclear transcription factor Y subunit alpha	12.98	9.49	8.56	15.62	13.12	10.74
ENSG00000001460	STPG1	sperm tail PG-rich repeat containing 1	5.79	6.69	7.49	10.7	9.11	9.82
ENSG00000001461	NIPAL3	NIPA like domain containing 3	17.07	20.63	18.49	22.44	16.33	19.69
ENSG00000001497	LAS1L	LAS1 like ribosome biogenesis factor	19.64	19.2	10.67	24.8	20.08	16.59
ENSG00000001561	ENPP4	ectonucleotide pyrophosphatase/phosphodiesterase 4	0.37	0.84	0.36	1.52	3.26	1.22
ENSG00000001617	SEMA3F	semaphorin 3F	14.55	13.05	10.71	18.93	21.96	24.42
ENSG00000001626	CFTR	CF transmembrane conductance regulator	0.8	0.46	0	0	0	0
ENSG00000001629	ANKIB1	ankyrin repeat and IBR domain containing 1	26.98	22.41	23.15	27.04	21.95	20.15
ENSG00000001630	CYP51A1	cytochrome P450 family 51 subfamily A member 1	45.24	35.88	65.08	38.39	36.64	76.19
ENSG00000001631	KRIT1	KRIT1 ankyrin repeat containing	30.77	23.48	22.86	24.97	24.3	19.2
ENSG00000002016	RAD52	RAD52 homolog, DNA repair protein	5.95	7.12	5.93	15.47	8.88	5.48
ENSG00000002079	MYH16		0	0	0.06	0	0	0
ENSG00000002330	BAD	BCL2 associated agonist of cell death	90.62	119.64	107.42	121.12	113.02	90.21
ENSG00000002549	LAP3	leucine aminopeptidase 3	63.69	68.24	65.88	75.93	60.16	52.13
ENSG00000002586	CD99	CD99 molecule (Xg blood group)	469.99	635.85	843.18	336.15	463.21	661.87
ENSG00000002587	HS3ST1	heparan sulfate-glucosamine 3-sulfotransferase 1	1.35	0.08	0	0.45	3.28	0.26
ENSG00000002726	AOC1	amine oxidase copper containing 1	0	0	0	0	0	0
ENSG00000002745	WNT16	Wnt family member 16	3.44	4.96	0.15	2.71	1.25	0.19
ENSG00000002746	HECW1	HECT, C2 and WW domain containing E3 ubiquitin protein ligase 1	6.04	3.88	0.62	9.55	4.06	3.55
ENSG00000002822	MAD1L1	mitotic arrest deficient 1 like 1	39.73	43.67	45.56	42.37	33.92	33.11
ENSG00000002834	LASP1	LIM and SH3 protein 1	165.92	193.52	178.87	215.37	192.04	182.28
ENSG00000002919	SNX11	sorting nexin 11	11.15	10.57	7.26	14.32	11.51	10.6
ENSG00000002933	TMEM176A	transmembrane protein 176A	0	0	0.47	0	0.86	0
ENSG00000003056	M6PR	mannose-6-phosphate receptor, cation dependent	55.84	61.35	58.4	73.69	57.63	58.95
ENSG00000003096	KLHL13	kelch like family member 13	0.36	0.55	0.48	1.47	8.79	1.8
ENSG00000003137	CYP26B1	cytochrome P450 family 26 subfamily B member 1	4.74	4.53	0.5	9.47	9.4	10.75
ENSG00000003147	ICA1	islet cell autoantigen 1	0	0	0	0.81	6.34	0.6
ENSG00000003249	DBNDD1	dysbindin domain containing 1	1.73	1.47	0.1	9.85	9.5	2.73
ENSG00000003393	ALS2	alsin Rho guanine nucleotide exchange factor ALS2	8.72	9.08	6.03	10.26	6.47	8.49
ENSG00000003400	CASP10	caspase 10	2.26	1.02	1.55	0.47	0.84	0.23
ENSG00000003402	CFLAR	CASP8 and FADD like apoptosis regulator	23.29	34.19	37.43	26.53	26.32	25.27
ENSG00000003436	TFPI	tissue factor pathway inhibitor	90.84	90.04	44.95	115.54	64.94	25.75
ENSG00000003509	NDUFAF7	NADH:ubiquinone oxidoreductase complex assembly factor 7	12.42	10.13	8.25	11.21	9.76	9.32
ENSG00000003756	RBM5	RNA binding motif protein 5	94.26	73.79	68.16	98.77	69.25	81.31
ENSG00000003987	MTMR7	myotubularin related protein 7	0.84	0.43	0.28	0.45	0.29	0.24
ENSG00000003989	SLC7A2	solute carrier family 7 member 2	0.04	0	0.17	0.17	0.24	0.26
ENSG00000004059	ARF5	ADP ribosylation factor 5	173.92	177.09	207.66	166.41	176.21	228.77
ENSG00000004139	SARM1	sterile alpha and TIR motif containing 1	7.03	5.75	8.84	12.45	13.36	11.02
ENSG00000004142	POLDIP2	DNA polymerase delta interacting protein 2	68.05	54.05	45.89	75.73	62.75	65.35
ENSG00000004399	PLXND1	plexin D1	131.83	138.11	263.71	83.8	65.13	232.84
ENSG00000004455	AK2	adenylate kinase 2	90.19	78.19	58.82	95.11	86.18	58.81
ENSG00000004468	CD38	CD38 molecule	0	0	0.34	0	0	0
ENSG00000004478	FKBP4	FKBP prolyl isomerase 4	23.26	27.44	17.93	31.23	23.33	20.45
ENSG00000004487	KDM1A	lysine demethylase 1A	32.18	34.25	29.41	29.73	36.76	39.39
ENSG00000004534	RBM6	RNA binding motif protein 6	61.15	46.38	34.82	52.53	40.31	36.13
ENSG00000004660	CAMKK1	calcium/calmodulin dependent protein kinase kinase 1	18.91	12.69	12.15	21.12	17.39	20.06
ENSG00000004700	RECQL	RecQ like helicase	71.37	70.94	31.85	87.89	97.99	54.1
ENSG00000004766	VPS50	VPS50 subunit of EARP/GARPII complex	17.03	7.21	10.02	12.15	12.7	12
ENSG00000004776	HSPB6	heat shock protein family B (small) member 6	603.11	554.91	852.38	439.21	289.79	513.47
ENSG00000004777	ARHGAP33	Rho GTPase activating protein 33	8.23	13.39	6.78	23.01	11.86	5.36
ENSG00000004779	NDUFAB1	NADH:ubiquinone oxidoreductase subunit AB1	130.42	126.46	84.23	136.38	123.75	98.95
ENSG00000004799	PDK4	pyruvate dehydrogenase kinase 4	2.16	1.49	0.97	1.53	1.3	3.96
ENSG00000004809	SLC22A16	solute carrier family 22 member 16	0	0	0	0	0	0
ENSG00000004838	ZMYND10	zinc finger MYND-type containing 10	1.33	3.2	2.9	1.53	3.79	1.12
ENSG00000004846	ABCB5	ATP binding cassette subfamily B member 5	0	0	0.34	0	0	0
ENSG00000004848	ARX	aristaless related homeobox	0	0	0	0	0	0
ENSG00000004864	SLC25A13	solute carrier family 25 member 13	11.63	5.74	5.35	12.2	7.86	7.8
ENSG00000004866	ST7	suppression of tumorigenicity 7	17	15.47	14.98	13.76	10.84	13.11
ENSG00000004866	ST7	ST7 overlapping transcript 3	17	15.47	14.98	13.76	10.84	13.11
ENSG00000004897	CDC27	cell division cycle 27	63.97	47.74	40.36	59.51	67.03	57.99
ENSG00000004939	SLC4A1	solute carrier family 4 member 1 (Diego blood group)	0	0	0	0	0	0
ENSG00000004948	CALCR	calcitonin receptor	0.05	0	0	0	0	0
ENSG00000004961	HCCS	holocytochrome c synthase	22.29	17.67	11.5	20.73	18.78	14.8
ENSG00000004975	DVL2	dishevelled segment polarity protein 2	31.96	47.03	47.16	37.53	36.9	43.19
ENSG00000005001	PRSS22	serine protease 22	0	0	0	0.41	2.7	0.56
ENSG00000005007	UPF1	UPF1 RNA helicase and ATPase	42.13	55.24	36.9	55.73	46.32	58.69
ENSG00000005020	SKAP2	src kinase associated phosphoprotein 2	15.2	16.46	10.77	4.62	3.59	8.78
ENSG00000005022	SLC25A5	solute carrier family 25 member 5	258.99	272.97	158.5	292.48	295.75	215.45
ENSG00000005059	MCUB	mitochondrial calcium uniporter dominant negative subunit beta	46.97	61.86	57.59	42.35	58.23	41.83
ENSG00000005073	HOXA11	homeobox A11	7.05	6.34	6.08	17.79	11.55	16.59
ENSG00000005075	POLR2J	RNA polymerase II subunit J	51.57	63.34	48.88	69.18	62.09	54.43
ENSG00000005100	DHX33	DEAH-box helicase 33	7.02	6.52	5.07	10.01	6.9	6.09
ENSG00000005102	MEOX1	mesenchyme homeobox 1	0	0	0	0	0	0
ENSG00000005108	THSD7A	thrombospondin type 1 domain containing 7A	0.03	0	0	0.07	0	0.07
ENSG00000005156	LIG3	DNA ligase 3	9.42	8.56	7.44	13.6	7.07	5.98
ENSG00000005175	RPAP3	RNA polymerase II associated protein 3	26.87	16.8	15.06	17.57	19.35	12.4
ENSG00000005187	ACSM3	acyl-CoA synthetase medium chain family member 3	0.97	0.63	1.65	0.86	0.31	0.17
ENSG00000005189	REXO5	RNA exonuclease 5	5.53	7.76	3.76	9.69	13.25	4.33
ENSG00000005194	CIAPIN1	cytokine induced apoptosis inhibitor 1	22.56	22.33	18.37	29.8	22.09	20.13
ENSG00000005206	SPPL2B	signal peptide peptidase like 2B	38.74	40.63	32.48	57.33	41.13	36.09
ENSG00000005238	FAM214B	family with sequence similarity 214 member B	30.69	28.5	23.79	43	33.76	29.44
ENSG00000005243	COPZ2	COPI coat complex subunit zeta 2	181.39	183.49	277.78	238.35	218.37	279
ENSG00000005249	PRKAR2B	protein kinase cAMP-dependent type II regulatory subunit beta	1.49	1.5	0.89	1.53	2.72	3.56
ENSG00000005302	MSL3	MSL complex subunit 3	22.94	18.54	14.62	17.54	19.28	19.7
ENSG00000005339	CREBBP	CREB binding protein	18.56	18.88	22.64	21.2	17.76	16.35
ENSG00000005379	TSPOAP1	TSPO associated protein 1	0.22	0.1	1.08	0.46	0.77	0.99
ENSG00000005381	MPO	myeloperoxidase	0	0	0	0.05	0	0
ENSG00000005421	PON1	paraoxonase 1	0.2	0	0.2	0	0	0.17
ENSG00000005436	GCFC2	GC-rich sequence DNA-binding factor 2	9.42	9.54	5.3	7.2	9.44	9.84
ENSG00000005448	WDR54	WD repeat domain 54	21.2	29.01	11.95	32.59	34.54	15.45
ENSG00000005469	CROT	carnitine O-octanoyltransferase	10.21	10.6	8.19	11.65	14.24	9.57
ENSG00000005471	ABCB4	ATP binding cassette subfamily B member 4	0.08	0	0.18	0.04	0.09	0.33
ENSG00000005483	KMT2E	lysine methyltransferase 2E (inactive)	30.23	37.29	30.34	35.99	34.2	29.37
ENSG00000005486	RHBDD2	rhomboid domain containing 2	40.67	40.96	32.76	67.22	45.19	34.91
ENSG00000005513	SOX8	SRY-box transcription factor 8	0.41	0.33	0.11	0.48	0.5	0.76
ENSG00000005700	IBTK	inhibitor of Bruton tyrosine kinase	29.81	25.39	22.45	20.69	21.29	21.37
ENSG00000005801	ZNF195	zinc finger protein 195	8.08	6.55	5.96	8.25	3.84	5.72
ENSG00000005810	MYCBP2	MYC binding protein 2	38.81	38.47	42.93	32.06	28.48	34.19
ENSG00000005812	FBXL3	F-box and leucine rich repeat protein 3	35.89	29.51	31.57	25.65	31.45	30.44
ENSG00000005844	ITGAL	integrin subunit alpha L	0.23	0	0	0.48	0	0
ENSG00000005882	PDK2	pyruvate dehydrogenase kinase 2	32.55	24.66	34.8	31.78	28.79	35.82
ENSG00000005884	ITGA3	integrin subunit alpha 3	63.15	61.81	18	127.05	114.12	80.2
ENSG00000005889	ZFX	zinc finger protein X-linked	12.28	14.46	15.35	17.93	14.56	14.01
ENSG00000005893	LAMP2	lysosomal associated membrane protein 2	94.68	95.66	108.51	61.91	85.87	101.8
ENSG00000005961	ITGA2B	integrin subunit alpha 2b	0	0.16	0.16	1.31	0	0.47
ENSG00000005981	ASB4	ankyrin repeat and SOCS box containing 4	0.05	0	0	0	0	0
ENSG00000006007	GDE1	glycerophosphodiester phosphodiesterase 1	52.47	58.72	49.58	51.89	58.61	50.26
ENSG00000006015	REX1BD	required for excision 1-B domain containing	78.57	92.94	97.32	88.64	84.72	103.75
ENSG00000006016	CRLF1	cytokine receptor like factor 1	284.79	515.49	455.33	222.82	223.16	377.87
ENSG00000006025	OSBPL7	oxysterol binding protein like 7	2.35	2.87	4.94	5.07	3.75	4.88
ENSG00000006042	TMEM98	transmembrane protein 98	96.55	93.81	112.03	38.8	51.94	85.26
ENSG00000006047	YBX2	Y-box binding protein 2	0	0	0	0	0.44	0.2
ENSG00000006059	KRT33A	keratin 33A	0	0	0	0	0	0
ENSG00000006062	MAP3K14	mitogen-activated protein kinase kinase kinase 14	5.05	4.95	3.13	7.74	7.74	4.62
ENSG00000006071	ABCC8	ATP binding cassette subfamily C member 8	0	0	0	0	0	0
ENSG00000006116	CACNG3	calcium voltage-gated channel auxiliary subunit gamma 3	0	0	0	0	0	0
ENSG00000006118	TMEM132A	transmembrane protein 132A	2.2	6.37	2.82	4.48	3.84	3.83
ENSG00000006125	AP2B1	adaptor related protein complex 2 subunit beta 1	93.17	93.34	91.73	99.79	100.24	109.64
ENSG00000006128	TAC1	tachykinin precursor 1	0	0	0	0	0	0
ENSG00000006194	ZNF263	zinc finger protein 263	13.32	19.7	20.4	17.45	18.98	17.62
ENSG00000006210	CX3CL1	C-X3-C motif chemokine ligand 1	0.16	0	0.05	0.51	0.16	0
ENSG00000006282	SPATA20	spermatogenesis associated 20	93.57	99.19	82.4	93.44	81.74	95.14
ENSG00000006283	CACNA1G	calcium voltage-gated channel subunit alpha1 G	0.78	1.05	1.29	0.42	0.79	2.43
ENSG00000006327	TNFRSF12A	TNF receptor superfamily member 12A	347.96	348.05	100.96	518.2	330.58	154.18
ENSG00000006377	DLX6	distal-less homeobox 6	0	0	0	0.08	0.24	0
ENSG00000006432	MAP3K9	mitogen-activated protein kinase kinase kinase 9	0.02	0	0	0.27	0.19	0.08
ENSG00000006451	RALA	RAS like proto-oncogene A	40.5	35.73	46.86	34.95	32.9	49.43
ENSG00000006453	BAIAP2L1	BAR/IMD domain containing adaptor protein 2 like 1	5.79	4.66	4.85	7.59	3.9	4.83
ENSG00000006459	KDM7A	lysine demethylase 7A	2.22	0.95	4.28	2.02	0.91	3.82
ENSG00000006468	ETV1	ETS variant transcription factor 1	48.81	38.75	5.4	37.47	34.19	21.34
ENSG00000006530	AGK	acylglycerol kinase	18.48	16.28	10.37	20.41	17.92	12.98
ENSG00000006534	ALDH3B1	aldehyde dehydrogenase 3 family member B1	27.07	36.95	26.81	48.79	46.08	31.68
ENSG00000006555	TTC22	tetratricopeptide repeat domain 22	0	0	0	0	0	0
ENSG00000006576	PHTF2	putative homeodomain transcription factor 2	21.8	16.29	13.16	18.98	18.76	18.65
ENSG00000006606	CCL26	C-C motif chemokine ligand 26	4.74	2.07	4.28	2.27	0	4.22
ENSG00000006607	FARP2	FERM, ARH/RhoGEF and pleckstrin domain protein 2	17.88	16.44	12.17	17.03	12.54	10.55
ENSG00000006611	USH1C	USH1 protein network component harmonin	0	0	0	0	0	0
ENSG00000006625	GGCT	gamma-glutamylcyclotransferase	22.93	22.16	17.51	28.91	22.51	18.47
ENSG00000006634	DBF4	DBF4 zinc finger	12.1	10.59	4.08	16.65	19.87	5.15
ENSG00000006638	TBXA2R	thromboxane A2 receptor	5.98	10.07	8.05	9.41	7.58	9.13
ENSG00000006652	IFRD1	interferon related developmental regulator 1	16.18	9.67	16.02	18.63	11.7	18.17
ENSG00000006659	LGALS14	galectin 14	0	0	0	0	0	0
ENSG00000006695	COX10	cytochrome c oxidase assembly factor heme A:farnesyltransferase COX10	7.81	6.95	4.37	7.72	7.97	5.51
ENSG00000006704	GTF2IRD1	GTF2I repeat domain containing 1	10.28	8.46	12.57	31.67	23.5	15.19
ENSG00000006712	PAF1	PAF1 homolog, Paf1/RNA polymerase II complex component	50.65	54.43	52.37	63	61.4	49.64
ENSG00000006715	VPS41	VPS41 subunit of HOPS complex	47.84	19.85	29.52	31.5	26.72	24.27
ENSG00000006740	ARHGAP44	Rho GTPase activating protein 44	3.58	3.42	3.52	10.29	7.73	7.63
ENSG00000006744	ELAC2	elaC ribonuclease Z 2	50.22	40.21	24.12	55.65	41.24	33.98
ENSG00000006747	SCIN	scinderin	0.13	0.87	2.07	3.76	1.67	0.81
ENSG00000006756	ARSD	arylsulfatase D	10.1	10.62	10.32	10.02	8.23	16.08
ENSG00000006757	PNPLA4	patatin like phospholipase domain containing 4	15.39	13.69	24.49	20.42	23.06	19.61
ENSG00000006788	MYH13	myosin heavy chain 13	0	0	0	0	0	0
ENSG00000006831	ADIPOR2	adiponectin receptor 2	24.85	24.96	23.66	26.44	28.94	33.36
ENSG00000006837	CDKL3	cyclin dependent kinase like 3	3.79	3.99	2.93	2.87	2.39	3.22
ENSG00000007001	UPP2	uridine phosphorylase 2	0	0	0	0	0	0
ENSG00000007038	PRSS21	serine protease 21	0.38	0	0.58	0.73	2.51	1.25
ENSG00000007047	MARK4	microtubule affinity regulating kinase 4	25.44	14.9	27.53	17.1	14.06	15.57
ENSG00000007062	PROM1	prominin 1	0	0	0	0	0	0
ENSG00000007080	CCDC124	coiled-coil domain containing 124	100.72	139.02	81.47	143.13	122.98	101.98
ENSG00000007129	CEACAM21	CEA cell adhesion molecule 21	0	0	0	0	0	0
ENSG00000007168	PAFAH1B1	platelet activating factor acetylhydrolase 1b regulatory subunit 1	70.3	56.79	43.24	63.56	63.89	54.02
ENSG00000007171	NOS2	nitric oxide synthase 2	0	0	0	0	0	0
ENSG00000007174	DNAH9	dynein axonemal heavy chain 9	0.1	0.11	0	0.01	0.06	0.23
ENSG00000007202	KIAA0100	KIAA0100	70.21	61.6	43.45	81.98	68.58	57.62
ENSG00000007216	SLC13A2	solute carrier family 13 member 2	0	0	0	0	0	0
ENSG00000007237	GAS7	growth arrest specific 7	1.72	4.19	3.4	0.45	2.19	3.12
ENSG00000007255	TRAPPC6A	trafficking protein particle complex 6A	8.9	5.86	23.04	13.75	11.31	32.26
ENSG00000007264	MATK	megakaryocyte-associated tyrosine kinase	0	0	0	0.33	0.3	0.89
ENSG00000007306	CEACAM7	CEA cell adhesion molecule 7	0	0	0	0	0	0
ENSG00000007312	CD79B	CD79b molecule	0	0	1.3	0.51	2.12	2.58
ENSG00000007314	SCN4A	sodium voltage-gated channel alpha subunit 4	0	0	0.02	0	0	0
ENSG00000007341	ST7L	suppression of tumorigenicity 7 like	17.68	15.22	10.96	13.04	14.96	6.16
ENSG00000007350	TKTL1	transketolase like 1	0	0	0	0	0	0
ENSG00000007372	PAX6	paired box 6	0	0	0	0.09	0.17	0
ENSG00000007376	RPUSD1	RNA pseudouridine synthase domain containing 1	19.11	22.12	16.15	29.13	23.86	14
ENSG00000007384	RHBDF1	rhomboid 5 homolog 1	139.56	147.13	62.55	144.19	110.07	56.57
ENSG00000007392	LUC7L	LUC7 like	48.71	50.17	33.12	52.8	31.57	35.98
ENSG00000007402	CACNA2D2	calcium voltage-gated channel auxiliary subunit alpha2delta 2	0.09	0.08	0.44	0.48	0.14	0.62
ENSG00000007516	BAIAP3	BAI1 associated protein 3	0.05	0	0.27	1.22	0.57	0.36
ENSG00000007520	TSR3	TSR3 ribosome maturation factor	79.47	108.32	92.4	81.86	94.43	84.77
ENSG00000007541	PIGQ	phosphatidylinositol glycan anchor biosynthesis class Q	27.55	38.17	31.4	46.02	41.51	35.84
ENSG00000007545	CRAMP1	cramped chromatin regulator homolog 1	10.36	10.39	5.32	8.68	8.44	26.62
ENSG00000007866	TEAD3	TEA domain transcription factor 3	18.31	13.78	15.91	15.98	6.89	12.28
ENSG00000007908	SELE	selectin E	0	0	0	0	0	0
ENSG00000007923	DNAJC11	DnaJ heat shock protein family (Hsp40) member C11	25.69	29.93	19.52	37.1	29.48	19.08
ENSG00000007933	FMO3	flavin containing dimethylaniline monoxygenase 3	0.09	0.1	0	0.98	0.36	0
ENSG00000007944	MYLIP	myosin regulatory light chain interacting protein	3.19	4.78	7.17	2.86	4.68	6.71
ENSG00000007952	NOX1	NADPH oxidase 1	0	0	0	0	0	0
ENSG00000007968	E2F2	E2F transcription factor 2	1.93	2.13	0.06	2.29	3.51	0.14
ENSG00000008018	PSMB1	proteasome 20S subunit beta 1	221.7	220.47	197.93	235.6	247.99	220.73
ENSG00000008056	SYN1	synapsin I	1.32	1.14	0.36	1.03	0.44	0.14
ENSG00000008083	JARID2	jumonji and AT-rich interaction domain containing 2	6.38	6.45	8.24	5.95	6.23	7.93
ENSG00000008086	CDKL5	cyclin dependent kinase like 5	0.92	0.76	0.89	0.64	0.81	0.99
ENSG00000008118	CAMK1G	calcium/calmodulin dependent protein kinase IG	1.24	4.96	2.96	0.21	0.56	0.75
ENSG00000008128	CDK11A	cyclin dependent kinase 11A	28.26	47.22	24.01	48.5	30.55	26.01
ENSG00000008130	NADK	NAD kinase	49.21	63.22	33.86	71.35	53.42	38.32
ENSG00000008196	TFAP2B	transcription factor AP-2 beta	0	0	0	0	0	0
ENSG00000008197	TFAP2D	transcription factor AP-2 delta	0	0	0	0	0	0
ENSG00000008226	DLEC1	DLEC1 cilia and flagella associated protein	0.05	0.11	0.25	0.18	0.11	0.09
ENSG00000008256	CYTH3	cytohesin 3	26.54	34.8	24.92	35.2	31.39	35.68
ENSG00000008277	ADAM22	ADAM metallopeptidase domain 22	0.73	0.27	0.89	0.56	0.82	2.39
ENSG00000008282	SYPL1	synaptophysin like 1	127.36	106.08	103.46	100.78	109.43	117.94
ENSG00000008283	CYB561	cytochrome b561	49.01	67.21	74.98	32.7	49.24	71.55
ENSG00000008294	SPAG9	sperm associated antigen 9	106.43	74.53	64.64	68.26	69.11	87.01
ENSG00000008300	CELSR3	cadherin EGF LAG seven-pass G-type receptor 3	0.93	0.6	0.42	1.92	1.04	1.09
ENSG00000008311	AASS	aminoadipate-semialdehyde synthase	6.82	7.11	5.91	6.78	5.49	4.67
ENSG00000008323	PLEKHG6	pleckstrin homology and RhoGEF domain containing G6	0.11	0	0.59	0.57	0.15	0
ENSG00000008324	SS18L2	SS18 like 2	12.36	9.11	9.67	18.3	11.89	13.02
ENSG00000008382	MPND	MPN domain containing	9.53	6.76	8.96	9.75	10.47	7.8
ENSG00000008394	MGST1	microsomal glutathione S-transferase 1	683.19	314.68	708.45	287.11	224.74	644.83
ENSG00000008405	CRY1	cryptochrome circadian regulator 1	9.37	8.9	7.27	8.63	6.57	6.9
ENSG00000008438	PGLYRP1	peptidoglycan recognition protein 1	0	0.41	0	0	0	0
ENSG00000008441	NFIX	nuclear factor I X	231.56	261.04	229.28	248.97	299.76	297.31
ENSG00000008513	ST3GAL1	ST3 beta-galactoside alpha-2,3-sialyltransferase 1	13.2	9.94	7.1	18.47	9.8	11.02
ENSG00000008516	MMP25	matrix metallopeptidase 25	0	0.41	1.13	0.2	0.05	0.13
ENSG00000008517	IL32	interleukin 32	2.23	3.93	4.74	1.48	3.05	3.36
ENSG00000008710	PKD1	polycystin 1, transient receptor potential channel interacting	91.95	112.37	75.75	143.48	80.08	93.44
ENSG00000008735	MAPK8IP2	mitogen-activated protein kinase 8 interacting protein 2	0.12	0.51	0.79	0.68	0.39	0.95
ENSG00000008838	MED24	mediator complex subunit 24	51.04	56.98	44.13	56.22	51.91	36.45
ENSG00000008853	RHOBTB2	Rho related BTB domain containing 2	13.75	16.15	11.29	15.31	12.8	11.22
ENSG00000008869	HEATR5B	HEAT repeat containing 5B	6.08	4.77	4.02	6.68	5.33	5.39
ENSG00000008952	SEC62	SEC62 homolog, preprotein translocation factor	65.75	56.59	54.41	54.27	53.51	52.31
ENSG00000008988	RPS20	ribosomal protein S20	1833.72	2423.54	2392.93	1925.54	2201.19	2348.86
ENSG00000009307	CSDE1	cold shock domain containing E1	242.04	205.19	213.09	198.78	214.38	215.96
ENSG00000009335	UBE3C	ubiquitin protein ligase E3C	58.36	56.93	31.45	70.49	51.65	42.1
ENSG00000009413	REV3L	REV3 like, DNA directed polymerase zeta catalytic subunit	20.81	19.54	69.13	16.48	20.51	48.1
ENSG00000009694	TENM1	teneurin transmembrane protein 1	0.03	0	0.01	0	0	0.01
ENSG00000009709	PAX7	paired box 7	0	0	0	0	0	0
ENSG00000009724	MASP2	mannan binding lectin serine peptidase 2	0.95	0.75	0.66	1.34	0.44	0.57
ENSG00000009765	IYD	iodotyrosine deiodinase	0	0	0	0	0	0
ENSG00000009780	FAM76A	family with sequence similarity 76 member A	6.62	5.9	9.71	5.01	4.82	6.6
ENSG00000009790	TRAF3IP3	TRAF3 interacting protein 3	0.05	0.06	0	0.05	0	0.73
ENSG00000009830	POMT2	protein O-mannosyltransferase 2	9.32	11.25	6.22	14.35	9.81	8.83
ENSG00000009844	VTA1	vesicle trafficking 1	49.75	41.28	33.34	42.02	43.2	38.49
ENSG00000009950	MLXIPL	MLX interacting protein like	0	0	0.72	0.16	1.77	0
ENSG00000009954	BAZ1B	bromodomain adjacent to zinc finger domain 1B	39.68	36.14	31.41	53.14	41.11	33.63
ENSG00000010017	RANBP9	RAN binding protein 9	47.33	39.6	35.78	43.01	55.73	39.26
ENSG00000010030	ETV7	ETS variant transcription factor 7	0	0	2.92	0.35	0.14	0.33
ENSG00000010072	SPRTN	SprT-like N-terminal domain	7.79	5.11	4.4	5.35	8.15	4.58
ENSG00000010165	EEF1AKNMT	eEF1A lysine and N-terminal methyltransferase	24.19	28.94	20.87	26.15	27.34	21.53
ENSG00000010219	DYRK4	dual specificity tyrosine phosphorylation regulated kinase 4	3.5	10.33	4.45	21.42	13.66	6.64
ENSG00000010244	ZNF207	zinc finger protein 207	106.84	88.76	66.56	100.77	96.79	84.46
ENSG00000010256	UQCRC1	ubiquinol-cytochrome c reductase core protein 1	136.51	136.24	104.25	165.72	153.99	132.78
ENSG00000010270	STARD3NL	STARD3 N-terminal like	46.04	28.52	28.44	43.4	34.33	31.28
ENSG00000010278	CD9	CD9 molecule	353.61	346.17	251.86	453.3	603.09	394.98
ENSG00000010282	HHATL	hedgehog acyltransferase like	0	0	0	0	0	0
ENSG00000010292	NCAPD2	non-SMC condensin I complex subunit D2	29.02	52.51	28.27	47.33	69.23	31.89
ENSG00000010295	IFFO1	intermediate filament family orphan 1	86.97	91.87	88.89	86.89	73.48	84.27
ENSG00000010310	GIPR	gastric inhibitory polypeptide receptor	0	0	0.28	0.05	0.11	0.09
ENSG00000010318	PHF7	PHD finger protein 7	4.11	2.74	3.01	5.74	5.43	9.07
ENSG00000010319	SEMA3G	semaphorin 3G	0.14	0	0	0.07	0.14	0.15
ENSG00000010322	NISCH	nischarin	53.93	47.55	46.11	53.86	44.51	48.87
ENSG00000010327	STAB1	stabilin 1	1.04	0.21	1.27	2.41	1.69	3.36
ENSG00000010361	FUZ	fuzzy planar cell polarity protein	12.64	20.39	18.67	24.92	26.09	21.72
ENSG00000010379	SLC6A13	solute carrier family 6 member 13	0	0	0	0.09	0	0
ENSG00000010404	IDS	iduronate 2-sulfatase	46.49	64.81	85.66	65.79	93.49	87.84
ENSG00000010438	PRSS3	serine protease 3	4.16	14.61	1.23	9.78	9.57	2.13
ENSG00000010539	ZNF200	zinc finger protein 200	3.88	5.03	3.02	5.11	2.46	4.34
ENSG00000010610	CD4	CD4 molecule	0	0	0.29	8.07	1.26	0.94
ENSG00000010626	LRRC23	leucine rich repeat containing 23	7.73	7.8	9.55	7.7	8.96	10.55
ENSG00000010671	BTK	Bruton tyrosine kinase	0	0	0	0	0	0.07
ENSG00000010704	HFE	homeostatic iron regulator	19.83	21.1	18.24	17.81	23.17	27.06
ENSG00000010803	SCMH1	Scm polycomb group protein homolog 1	15.99	17.01	19.96	20.9	25.1	24.19
ENSG00000010810	FYN	FYN proto-oncogene, Src family tyrosine kinase	210.31	155.38	253.19	172.35	213.09	192.2
ENSG00000010818	HIVEP2	HIVEP zinc finger 2	8.39	8.06	6.67	10.26	9.04	6.14
ENSG00000010932	FMO1	flavin containing dimethylaniline monoxygenase 1	0	0	0	0	0	0.36
ENSG00000011007	ELOA	elongin A	24.19	20.68	13.93	35.53	27.21	18.08
ENSG00000011009	LYPLA2	lysophospholipase 2	37.67	44.6	23.76	63.11	39.82	35.45
ENSG00000011021	CLCN6	chloride voltage-gated channel 6	8.46	11.08	9.75	8.54	6.99	8.82
ENSG00000011028	MRC2	mannose receptor C type 2	160.44	226.11	291.16	229.32	252.92	268.2
ENSG00000011052	NME1-NME2	NME1-NME2 readthrough	16.18	17.44	16.27	12.48	9.42	6.69
ENSG00000011083	SLC6A7	solute carrier family 6 member 7	0.22	0.16	0	0	0	0
ENSG00000011105	TSPAN9	tetraspanin 9	3.7	9.99	12.84	4.11	8.56	9.7
ENSG00000011114	BTBD7	BTB domain containing 7	13.17	11.28	13.14	18.15	13.46	12.83
ENSG00000011132	APBA3	amyloid beta precursor protein binding family A member 3	15.99	13.76	6.81	20.39	9.73	10.56
ENSG00000011143	MKS1	MKS transition zone complex subunit 1	7.84	8.91	6.24	12.97	12.49	7.67
ENSG00000011198	ABHD5	abhydrolase domain containing 5, lysophosphatidic acid acyltransferase	16.2	13.29	14.65	16.14	16.93	25.63
ENSG00000011201	ANOS1	anosmin 1	0	0.09	0.24	0.1	0.19	0.05
ENSG00000011243	AKAP8L	A-kinase anchoring protein 8 like	35.14	39.94	24.61	46.01	31.41	33.09
ENSG00000011258	MBTD1	mbt domain containing 1	2.89	2.75	3.06	2.71	3.41	2.43
ENSG00000011260	UTP18	UTP18 small subunit processome component	36.16	35.08	26.05	37.41	28.42	27.23
ENSG00000011275	RNF216	ring finger protein 216	13.68	12.27	12.71	17.26	13.85	12.8
ENSG00000011295	TTC19	tetratricopeptide repeat domain 19	17.5	15.73	10.83	20.34	19.37	14.54
ENSG00000011304	PTBP1	polypyrimidine tract binding protein 1	131.12	179.1	130.28	209.47	181.5	146.37
ENSG00000011332	DPF1	double PHD fingers 1	1.95	1.3	0.23	8.72	4.56	0.77
ENSG00000011347	SYT7	synaptotagmin 7	5.66	5.86	1.85	12.26	7.32	2.84
ENSG00000011376	LARS2	leucyl-tRNA synthetase 2, mitochondrial	10.29	7.29	9.4	9.44	10.2	7.26
ENSG00000011405	PIK3C2A	phosphatidylinositol-4-phosphate 3-kinase catalytic subunit type 2 alpha	13.38	10.47	15.61	9.91	11.76	10.61
ENSG00000011422	PLAUR	plasminogen activator, urokinase receptor	164.57	129.29	54.16	179.87	94.31	59.94
ENSG00000011426	ANLN	anillin actin binding protein	69.58	59.5	6.09	85.93	107.72	20.07
ENSG00000011451	WIZ	WIZ zinc finger	34.05	37.97	37.81	44.54	35.04	33.41
ENSG00000011454	RABGAP1	RAB GTPase activating protein 1	17.65	20.34	16.13	18.21	20.19	17.37
ENSG00000011465	DCN	decorin	801.02	1733.98	4864.48	580.13	1080.28	2017.23
ENSG00000011478	QPCTL	glutaminyl-peptide cyclotransferase like	8.57	9.53	7.72	14	8.95	8.06
ENSG00000011485	PPP5C	protein phosphatase 5 catalytic subunit	85.03	89.34	39.41	76	75.91	53.37
ENSG00000011523	CEP68	centrosomal protein 68	4.51	5.94	6.16	3.85	6.32	6.18
ENSG00000011566	MAP4K3	mitogen-activated protein kinase kinase kinase kinase 3	18.59	22.77	12.01	16.76	15.16	12.91
ENSG00000011590	ZBTB32	zinc finger and BTB domain containing 32	0.48	0.37	0.19	0.1	0	0
ENSG00000011600	TYROBP	transmembrane immune signaling adaptor TYROBP	0	0	0	0	0	0
ENSG00000011638	TMEM159	transmembrane protein 159	33.14	45.64	50.21	20.55	30.67	27.59
ENSG00000011677	GABRA3	gamma-aminobutyric acid type A receptor subunit alpha3	0	0	0	0	0.05	3.62
ENSG00000012048	BRCA1	BRCA1 DNA repair associated	13.71	13.21	3.02	20.03	23.1	2.55
ENSG00000012061	ERCC1	ERCC excision repair 1, endonuclease non-catalytic subunit	85.56	88.14	57.08	102.57	84.85	58.6
ENSG00000012124	CD22	CD22 molecule	0.6	1.78	1.96	2.61	1.39	0.46
ENSG00000012171	SEMA3B	semaphorin 3B	2.3	8.29	16.92	17.42	36.69	19.38
ENSG00000012174	MBTPS2	membrane bound transcription factor peptidase, site 2	22.12	19.27	14.52	21.49	23.14	15.94
ENSG00000012211	PRICKLE3	prickle planar cell polarity protein 3	4.76	6.24	8.31	8.67	7.22	6.96
ENSG00000012223	LTF	lactotransferrin	0.49	0.2	0	0	0.17	0
ENSG00000012232	EXTL3	exostosin like glycosyltransferase 3	17.7	16.29	10.18	16.77	17.03	16.95
ENSG00000012504	NR1H4	nuclear receptor subfamily 1 group H member 4	0	0	0	0	0	0
ENSG00000012660	ELOVL5	ELOVL fatty acid elongase 5	62.68	58.84	72.58	40.84	56.18	58.1
ENSG00000012779	ALOX5	arachidonate 5-lipoxygenase	0	0	0	0	0.1	0
ENSG00000012817	KDM5D	lysine demethylase 5D	0	0	0	0	0	0
ENSG00000012822	CALCOCO1	calcium binding and coiled-coil domain 1	71.59	75.1	116.97	76.42	69.15	96.57
ENSG00000012963	UBR7	ubiquitin protein ligase E3 component n-recognin 7	21.24	21.76	12.43	29.97	33.71	12.35
ENSG00000012983	MAP4K5	mitogen-activated protein kinase kinase kinase kinase 5	46.96	33.9	45.43	49.52	43.45	36.93
ENSG00000013016	EHD3	EH domain containing 3	13.57	14.52	6.69	11.82	9.25	8.59
ENSG00000013275	PSMC4	proteasome 26S subunit, ATPase 4	64.88	75.05	53.32	101.76	79.49	70.67
ENSG00000013288	MAN2B2	mannosidase alpha class 2B member 2	29.77	37.04	41.66	36.52	40.74	33.31
ENSG00000013293	SLC7A14	solute carrier family 7 member 14	3.91	12.47	3.79	1.86	7.54	0.52
ENSG00000013297	CLDN11	claudin 11	773.52	1099.77	664.87	291.57	380.35	224.47
ENSG00000013306	SLC25A39	solute carrier family 25 member 39	116.79	110.85	82.84	134.2	121.95	94.77
ENSG00000013364	MVP	major vault protein	215.95	320.8	233.18	310.54	297.02	222.68
ENSG00000013374	NUB1	negative regulator of ubiquitin like proteins 1	38.91	33.62	39.07	45	41.45	42.43
ENSG00000013375	PGM3	phosphoglucomutase 3	38.33	40.08	25.39	44.01	54.45	28.59
ENSG00000013392	RWDD2A	RWD domain containing 2A	2.92	1.63	1.73	2.55	2.56	2.04
ENSG00000013441	CLK1	CDC like kinase 1	56.67	57.18	51	54.34	60.84	65.12
ENSG00000013503	POLR3B	RNA polymerase III subunit B	7.67	6.42	5.18	5.71	6.63	6.58
ENSG00000013523	ANGEL1	angel homolog 1	6.52	5.95	4.76	6.68	6.96	4.58
ENSG00000013561	RNF14	ring finger protein 14	50.86	39.66	43.21	45.17	41.49	46.11
ENSG00000013563	DNASE1L1	deoxyribonuclease 1 like 1	40.46	33.65	33.98	80.22	47.28	45.5
ENSG00000013573	DDX11	DEAD/H-box helicase 11	22.53	23.06	4.11	41.14	24.76	5.97
ENSG00000013583	HEBP1	heme binding protein 1	103.84	102.28	115.65	78.21	77.67	106.74
ENSG00000013588	GPRC5A	G protein-coupled receptor class C group 5 member A	8.18	17.07	5.08	20.72	14.33	3.52
ENSG00000013619	MAMLD1	mastermind like domain containing 1	12.38	9.51	3.79	52.34	22.58	5.44
ENSG00000013725	CD6	CD6 molecule	0	0	0	0	0	0
ENSG00000013810	TACC3	transforming acidic coiled-coil containing protein 3	40.02	50.37	5.29	71.99	77.05	13.18
ENSG00000014123	UFL1	UFM1 specific ligase 1	17.48	12.95	14.72	19.48	14.94	18.92
ENSG00000014138	POLA2	DNA polymerase alpha 2, accessory subunit	12.07	9.05	2.72	20.52	14.28	2.72
ENSG00000014164	ZC3H3	zinc finger CCCH-type containing 3	11.38	14.86	9.67	15.34	11.15	10.16
ENSG00000014216	CAPN1	calpain 1	117.9	169.12	118.42	124.31	110.84	123.61
ENSG00000014257	ACP3	acid phosphatase 3	0.11	1.4	1.1	1.48	0.38	0.09
ENSG00000014641	MDH1	malate dehydrogenase 1	179.55	168.51	130.59	167.56	172.84	150.81
ENSG00000014824	SLC30A9	solute carrier family 30 member 9	48.91	30.04	26.73	36.56	29.64	31.94
ENSG00000014914	MTMR11	myotubularin related protein 11	36.73	33.05	35.87	28.47	31.03	50.61
ENSG00000014919	COX15	cytochrome c oxidase assembly homolog COX15	8.41	10.97	13.54	16.64	15.25	15.86
ENSG00000015133	CCDC88C	coiled-coil domain containing 88C	0	0	0.06	0.12	0.05	0.19
ENSG00000015153	YAF2	YY1 associated factor 2	12.98	10.32	6.81	8.76	8.32	7.88
ENSG00000015171	ZMYND11	zinc finger MYND-type containing 11	42.26	32.02	31.52	31.86	34.85	37.7
ENSG00000015285	WAS	WASP actin nucleation promoting factor	1.04	0	0.1	0.48	1.42	0
ENSG00000015413	DPEP1	dipeptidase 1	0	0	0	0	0	0
ENSG00000015475	BID	BH3 interacting domain death agonist	10.86	13.4	6.1	23.88	17.45	6.18
ENSG00000015479	MATR3	matrin 3	191.43	112.96	136.66	124.23	142.72	140.05
ENSG00000015520	NPC1L1	NPC1 like intracellular cholesterol transporter 1	0	0.08	0.04	0	0	0.03
ENSG00000015532	XYLT2	xylosyltransferase 2	32.22	33.91	18.78	32.87	27.82	29.47
ENSG00000015568	RGPD5	RANBP2 like and GRIP domain containing 5	1.97	1.54	73.97	5.57	7.1	1.69
ENSG00000015592	STMN4	stathmin 4	0	0	0	0	0	0
ENSG00000015676	NUDCD3	NudC domain containing 3	64.66	36.94	35.66	47.12	39.45	36.25
ENSG00000016082	ISL1	ISL LIM homeobox 1	0	0	0.08	0	0	0.38
ENSG00000016391	CHDH	choline dehydrogenase	2	0.43	0.87	0.42	1.27	0.35
ENSG00000016402	IL20RA	interleukin 20 receptor subunit alpha	0.24	0.47	0.41	0.1	0.3	0.74
ENSG00000016490	CLCA1	chloride channel accessory 1	0.29	0.54	0.12	0.06	0.18	0.2
ENSG00000016602	CLCA4	chloride channel accessory 4	0	0	0	0	0	0
ENSG00000016864	GLT8D1	glycosyltransferase 8 domain containing 1	95.75	93.02	108.53	100.96	85.66	117.2
ENSG00000017260	ATP2C1	ATPase secretory pathway Ca2+ transporting 1	52.99	54.33	46.07	42.48	47.3	46.68
ENSG00000017427	IGF1	insulin like growth factor 1	0.07	0	2.21	0	0.07	2.08
ENSG00000017483	SLC38A5	solute carrier family 38 member 5	129.85	78.7	40.37	165.75	97.72	56.29
ENSG00000017797	RALBP1	ralA binding protein 1	49.89	43.34	35.5	47.8	47.88	46.74
ENSG00000018189	RUFY3	RUN and FYVE domain containing 3	24.89	31.51	28.99	18	20.85	23.96
ENSG00000018236	CNTN1	contactin 1	0.4	0.88	0.49	0.24	0.8	0.27
ENSG00000018280	SLC11A1	solute carrier family 11 member 1	0.19	0.22	0.19	0.28	0.19	0.27
ENSG00000018408	WWTR1	WW domain containing transcription regulator 1	84.71	64.76	33.9	98.29	69.25	33.74
ENSG00000018510	AGPS	alkylglycerone phosphate synthase	14.74	16.9	9.46	16.6	18.33	9.44
ENSG00000018607	ZNF806	zinc finger protein 806	0	0	0	0	0.11	0
ENSG00000018610	CXorf56	chromosome X open reading frame 56	11.86	10.38	10.28	13.48	8.11	9.72
ENSG00000018625	ATP1A2	ATPase Na+/K+ transporting subunit alpha 2	0	0	0	0	0.12	0
ENSG00000018699	TTC27	tetratricopeptide repeat domain 27	14.34	10.54	7.92	15.28	14.82	11.58
ENSG00000018869	ZNF582	zinc finger protein 582	2.9	2.85	2.19	3.31	2.79	3.47
ENSG00000019102	VSIG2	V-set and immunoglobulin domain containing 2	0	0	0	0	0.17	0.15
ENSG00000019144	PHLDB1	pleckstrin homology like domain family B member 1	75.63	88.67	87.29	113.78	82.74	75.24
ENSG00000019169	MARCO	macrophage receptor with collagenous structure	0	0	0	0	0	0
ENSG00000019186	CYP24A1	cytochrome P450 family 24 subfamily A member 1	0	0	0	0	0	0.14
ENSG00000019485	PRDM11	PR/SET domain 11	3.66	7.65	3.04	5.15	5.83	4.75
ENSG00000019505	SYT13	synaptotagmin 13	0	0	0	0	0	0
ENSG00000019549	SNAI2	snail family transcriptional repressor 2	158.84	72.58	224.68	59.69	67.96	292
ENSG00000019582	CD74	CD74 molecule	434.22	139.85	275.55	339.8	412.78	647.06
ENSG00000019991	HGF	hepatocyte growth factor	80.01	67.4	34.29	39.93	31.36	19.78
ENSG00000019995	ZRANB1	zinc finger RANBP2-type containing 1	8.05	5.93	6.91	6.54	6.94	6.13
ENSG00000020129	NCDN	neurochondrin	32.45	26.82	27.17	57.24	35.28	29.73
ENSG00000020181	ADGRA2	adhesion G protein-coupled receptor A2	13.72	38.74	58.83	9.54	21.11	27.41
ENSG00000020219	CCT8L1P		0	0	0	0	0	0
ENSG00000020256	ZFP64	ZFP64 zinc finger protein	6.86	7.35	6.92	7.25	8.54	9.5
ENSG00000020426	MNAT1	MNAT1 component of CDK activating kinase	43.15	35.67	11.73	43.34	37.52	28.32
ENSG00000020577	SAMD4A	sterile alpha motif domain containing 4A	10.09	16.34	16.94	20.49	15.94	9.89
ENSG00000020633	RUNX3	RUNX family transcription factor 3	0	0	0	0.08	0	0.03
ENSG00000020922	MRE11	MRE11 homolog, double strand break repair nuclease	10.3	8.07	5.5	7.59	8.4	6.65
ENSG00000021300	PLEKHB1	pleckstrin homology domain containing B1	1.09	1.1	0.97	1.45	1.01	0
ENSG00000021355	SERPINB1	serpin family B member 1	25.88	25.62	29.64	26.3	29.35	30.6
ENSG00000021461	CYP3A43	cytochrome P450 family 3 subfamily A member 43	0	0	0	0	0	0
ENSG00000021488	SLC7A9	solute carrier family 7 member 9	0	0	0	0	0.12	0.5
ENSG00000021574	SPAST	spastin	9	7.83	6.71	5.63	6.99	7.61
ENSG00000021645	NRXN3	neurexin 3	0	0	0.11	0.45	0	0
ENSG00000021762	OSBPL5	oxysterol binding protein like 5	24.03	28.69	27.52	25.61	21.5	22.56
ENSG00000021776	AQR	aquarius intron-binding spliceosomal factor	17.96	9.03	7.59	9.53	9.12	10.19
ENSG00000021826	CPS1	carbamoyl-phosphate synthase 1	6.9	3.63	3.69	4.99	8.87	3.93
ENSG00000021852	C8B	complement C8 beta chain	0	0	0	0	0	0
ENSG00000022267	FHL1	four and a half LIM domains 1	140.15	141.56	241.52	122.65	116.07	185.55
ENSG00000022277	RTF2	replication termination factor 2	81.69	73.08	59.34	68.46	76.9	64.31
ENSG00000022355	GABRA1	gamma-aminobutyric acid type A receptor subunit alpha1	0	0	0	0	0	0
ENSG00000022556	NLRP2	NLR family pyrin domain containing 2	0	0.06	0	0.72	0.15	1.01
ENSG00000022567	SLC45A4	solute carrier family 45 member 4	0.28	0.92	0.25	0.9	0.98	0.8
ENSG00000022840	RNF10	ring finger protein 10	105.83	85.5	91.8	103.58	93.79	78.85
ENSG00000022976	ZNF839	zinc finger protein 839	6.39	7.56	4	11.37	7.03	5.88
ENSG00000023041	ZDHHC6	zinc finger DHHC-type palmitoyltransferase 6	31.82	19.02	16.96	26.2	22.39	22.38
ENSG00000023171	GRAMD1B	GRAM domain containing 1B	14.27	12.67	10.19	13	10.3	4.9
ENSG00000023191	RNH1	ribonuclease/angiogenin inhibitor 1	393.81	508.05	395.97	499.25	550.99	485.76
ENSG00000023228	NDUFS1	NADH:ubiquinone oxidoreductase core subunit S1	53.58	44.18	30.98	68.97	58.56	40.14
ENSG00000023287	RB1CC1	RB1 inducible coiled-coil 1	14.88	14.79	19.93	11.38	17.2	19.96
ENSG00000023318	ERP44	endoplasmic reticulum protein 44	19.36	14.21	16.17	14.82	16.48	15.46
ENSG00000023330	ALAS1	5'-aminolevulinate synthase 1	62.05	30.37	28.69	54.62	32.72	36.39
ENSG00000023445	BIRC3	baculoviral IAP repeat containing 3	1.5	2.21	0.1	2.84	2.98	0.21
ENSG00000023516	AKAP11	A-kinase anchoring protein 11	16.89	14.94	12.46	14.95	15.09	14.86
ENSG00000023572	GLRX2	glutaredoxin 2	44.85	32.21	30.49	42.43	28.3	24.68
ENSG00000023608	SNAPC1	small nuclear RNA activating complex polypeptide 1	13.1	9.71	10.09	15.55	12.12	11.52
ENSG00000023697	DERA	deoxyribose-phosphate aldolase	45.07	46.61	25.51	37.03	47.76	33.84
ENSG00000023734	STRAP	serine/threonine kinase receptor associated protein	105.42	93.73	72.12	110.52	95.82	80.05
ENSG00000023839	ABCC2	ATP binding cassette subfamily C member 2	4.61	3.31	33.91	3.34	8.48	21.81
ENSG00000023892	DEF6	DEF6 guanine nucleotide exchange factor	1.26	0.63	0.24	1.52	0.16	1.29
ENSG00000023902	PLEKHO1	pleckstrin homology domain containing O1	33.5	30.19	61.99	20.44	17.28	44.28
ENSG00000023909	GCLM	glutamate-cysteine ligase modifier subunit	37.66	20.86	19.36	45.57	46.79	48.98
ENSG00000024048	UBR2	ubiquitin protein ligase E3 component n-recognin 2	8.18	8.24	9.13	7.84	7.94	7.51
ENSG00000024422	EHD2	EH domain containing 2	237.98	275.32	295.04	268.21	288.1	341.84
ENSG00000024526	DEPDC1	DEP domain containing 1	10.01	10.77	0.44	12.93	19.8	3.64
ENSG00000024862	CCDC28A	coiled-coil domain containing 28A	8.3	10.14	10.89	9.57	10.52	13.71
ENSG00000025039	RRAGD	Ras related GTP binding D	0.21	0.12	2.42	1.43	0.65	1.03
ENSG00000025156	HSF2	heat shock transcription factor 2	11.81	11.11	6.25	9.41	9.52	7.12
ENSG00000025293	PHF20	PHD finger protein 20	23.44	25.2	16.62	25.53	31.71	24.93
ENSG00000025423	HSD17B6	hydroxysteroid 17-beta dehydrogenase 6	0.48	0.15	0.26	0.98	1.41	0.86
ENSG00000025434	NR1H3	nuclear receptor subfamily 1 group H member 3	11.82	8.29	13.68	12.4	7.48	8.08
ENSG00000025708	TYMP	thymidine phosphorylase	17.68	38.68	74.41	28.43	33.97	32.88
ENSG00000025770	NCAPH2	non-SMC condensin II complex subunit H2	24.05	29.34	12.82	42.65	42.64	13.85
ENSG00000025772	TOMM34	translocase of outer mitochondrial membrane 34	90.53	49.75	26.56	98.05	85.14	63.6
ENSG00000025796	SEC63	SEC63 homolog, protein translocation regulator	41.58	25.93	33.84	34.93	34.33	39.39
ENSG00000025800	KPNA6	karyopherin subunit alpha 6	21.42	22.76	17.73	24.19	24.85	20.55
ENSG00000026025	VIM	vimentin	10464.5	11706.4	11969.2	7666.39	10537.9	13401.7
ENSG00000026036	RTEL1-TNFRSF6B		5.77	5.4	3.5	8.8	5.12	3.01
ENSG00000026103	FAS	Fas cell surface death receptor	52.2	33.61	26.11	37.89	29.06	29.95
ENSG00000026297	RNASET2	ribonuclease T2	19.39	30.54	58.8	83.52	61.56	35.2
ENSG00000026508	CD44	CD44 molecule (Indian blood group)	578.55	496.99	738.65	619.25	622.41	831.77
ENSG00000026559	KCNG1	potassium voltage-gated channel modifier subfamily G member 1	0.9	0.57	0.33	2.12	2.82	0.71
ENSG00000026652	AGPAT4	1-acylglycerol-3-phosphate O-acyltransferase 4	6.02	6.03	5.07	4.19	3.41	4.91
ENSG00000026751	SLAMF7	SLAM family member 7	0	0	0	0	0	0.07
ENSG00000026950	BTN3A1	butyrophilin subfamily 3 member A1	22.31	16.71	18.52	16.21	23.32	19.03
ENSG00000027001	MIPEP	mitochondrial intermediate peptidase	13.33	23.19	8.48	19.46	18.38	14.18
ENSG00000027075	PRKCH	protein kinase C eta	0.55	1.15	2.66	2.31	1.7	3.26
ENSG00000027644	INSRR	insulin receptor related receptor	0	0	0.03	0	0	0.06
ENSG00000027697	IFNGR1	interferon gamma receptor 1	36.74	32.7	38.82	23.83	25.75	36.93
ENSG00000027847	B4GALT7	beta-1,4-galactosyltransferase 7	29.11	31.33	29.63	38.33	30.85	32.44
ENSG00000027869	SH2D2A	SH2 domain containing 2A	0.72	0	0.98	3.66	2.32	0.85
ENSG00000028116	VRK2	VRK serine/threonine kinase 2	40.29	24.08	12.84	32.55	26.93	14.29
ENSG00000028137	TNFRSF1B	TNF receptor superfamily member 1B	25.66	32.99	14.3	20.79	27.01	10.68
ENSG00000028203	VEZT	vezatin, adherens junctions transmembrane protein	35.07	31.16	26.61	35.95	32.39	22.08
ENSG00000028277	POU2F2	POU class 2 homeobox 2	9	9.71	0.58	7.87	3.8	1.79
ENSG00000028310	BRD9	bromodomain containing 9	29.74	29.02	18.88	36.37	23.88	20.96
ENSG00000028528	SNX1	sorting nexin 1	71.98	68.89	67.64	82.16	101.87	91.52
ENSG00000028839	TBPL1	TATA-box binding protein like 1	27.21	34.6	28.1	31.12	32.59	24.24
ENSG00000029153	ARNTL2	aryl hydrocarbon receptor nuclear translocator like 2	23.76	26.53	8.41	41.51	57.68	13.24
ENSG00000029363	BCLAF1	BCL2 associated transcription factor 1	55.8	49.89	34.02	47.5	48.09	41.07
ENSG00000029364	SLC39A9	solute carrier family 39 member 9	19.83	17.72	16.94	26.16	20.29	23.12
ENSG00000029534	ANK1	ankyrin 1	8.34	16.6	7.09	12.54	9.96	7.08
ENSG00000029559	IBSP	integrin binding sialoprotein	0	0	0	0	0	0
ENSG00000029639	TFB1M	transcription factor B1, mitochondrial	7.79	5.01	2.36	11.26	7.55	5.87
ENSG00000029725	RABEP1	rabaptin, RAB GTPase binding effector protein 1	25.06	20.38	20.17	20.92	23.11	19.57
ENSG00000029993	HMGB3	high mobility group box 3	37.05	31.45	16.09	31.26	34.2	14.76
ENSG00000030066	NUP160	nucleoporin 160	16.98	18.69	11.44	14.8	15.43	11.53
ENSG00000030110	BAK1	BCL2 antagonist/killer 1	12.22	14.72	8.22	13.81	12.2	10.39
ENSG00000030304	MUSK	muscle associated receptor tyrosine kinase	0.17	0.75	0.27	0.31	0.09	0.25
ENSG00000030419	IKZF2	IKAROS family zinc finger 2	2.77	2.85	1.44	3.79	3.4	1.13
ENSG00000030582	GRN	granulin precursor	309.9	381.87	545.91	264.48	313.65	396.36
ENSG00000031003	FAM13B	family with sequence similarity 13 member B	19.69	15.84	15.92	15.37	20.25	18.58
ENSG00000031081	ARHGAP31	Rho GTPase activating protein 31	6.25	3.73	8.12	7.1	4.4	6.45
ENSG00000031691	CENPQ	centromere protein Q	10.25	5.59	2.49	7.49	12.06	2.52
ENSG00000031698	SARS1	seryl-tRNA synthetase 1	107.17	97.99	111.16	118.2	98.68	103.97
ENSG00000031823	RANBP3	RAN binding protein 3	77.74	53.22	60.63	61.12	61.32	58.03
ENSG00000032219	ARID4A	AT-rich interaction domain 4A	6.78	5.37	5.78	7.33	7.6	7.45
ENSG00000032389	EIPR1	EARP complex and GARP complex interacting protein 1	20.5	25.13	12.58	27.65	29.82	17.75
ENSG00000032444	PNPLA6	patatin like phospholipase domain containing 6	99.83	132.33	103.4	118.81	106.13	110.21
ENSG00000032742	IFT88	intraflagellar transport 88	9.36	6.05	6.99	7.63	8.7	7.11
ENSG00000033011	ALG1	ALG1 chitobiosyldiphosphodolichol beta-mannosyltransferase	38.96	48.86	29.93	53.23	36.64	32.33
ENSG00000033030	ZCCHC8	zinc finger CCHC-type containing 8	13.6	13.01	9.58	12.08	9.19	7.44
ENSG00000033050	ABCF2	ATP binding cassette subfamily F member 2	20.79	25.75	28.19	40.28	27.14	14.25
ENSG00000033100	CHPF2	chondroitin polymerizing factor 2	67.81	71.46	73.95	115.65	56.87	88.48
ENSG00000033122	LRRC7	leucine rich repeat containing 7	0.16	0.14	0.06	0.27	0.67	0.07
ENSG00000033170	FUT8	fucosyltransferase 8	44.32	33.66	41.75	29.09	44.65	26.16
ENSG00000033178	UBA6	ubiquitin like modifier activating enzyme 6	10.65	29.49	13.85	12.29	29.38	27.88
ENSG00000033327	GAB2	GRB2 associated binding protein 2	3.07	3.08	5.74	3.22	1.71	3.82
ENSG00000033627	ATP6V0A1	ATPase H+ transporting V0 subunit a1	32.71	40.97	40.1	43.88	35.44	22.99
ENSG00000033800	PIAS1	protein inhibitor of activated STAT 1	11.88	10.25	10.46	9.93	10.32	8.02
ENSG00000033867	SLC4A7	solute carrier family 4 member 7	20.87	14.29	21.52	25.82	18.47	19.61
ENSG00000034053	APBA2	amyloid beta precursor protein binding family A member 2	0.23	0.54	0	0.98	0.53	0.25
ENSG00000034152	MAP2K3	mitogen-activated protein kinase kinase 3	103.88	91.25	50.02	125.45	87.41	65.1
ENSG00000034239	EFCAB1	EF-hand calcium binding domain 1	3.72	2.59	4.99	3.25	3.47	6.75
ENSG00000034510	TMSB10	thymosin beta 10	8806.69	11451.5	8468.02	7889.53	8272.49	9770.39
ENSG00000034533	ASTE1	asteroid homolog 1	2.88	4.31	4.1	3.31	3.64	3.98
ENSG00000034677	RNF19A	ring finger protein 19A, RBR E3 ubiquitin protein ligase	19.09	12.1	20.27	13.33	18.89	17.22
ENSG00000034693	PEX3	peroxisomal biogenesis factor 3	12.09	8.28	9.19	8.81	9.57	10.86
ENSG00000034713	GABARAPL2	GABA type A receptor associated protein like 2	114.31	121.01	136.99	108.88	122.77	131.97
ENSG00000034971	MYOC	myocilin	0.35	1.8	2.96	0.12	0.7	2.62
ENSG00000035115	SH3YL1	SH3 and SYLF domain containing 1	22.48	18.01	21.39	25.29	16.39	22.47
ENSG00000035141	FAM136A	family with sequence similarity 136 member A	33.61	30.31	16.13	37.33	26.94	19.81
ENSG00000035403	VCL	vinculin	97.44	100.73	78.62	89.38	90.59	67.71
ENSG00000035499	DEPDC1B	DEP domain containing 1B	2.42	3.94	0.24	4.58	6.73	1.35
ENSG00000035664	DAPK2	death associated protein kinase 2	1.52	3.56	2.91	8.37	12.14	9.36
ENSG00000035681	NSMAF	neutral sphingomyelinase activation associated factor	38.64	28.79	39.97	28.14	28.61	27.72
ENSG00000035687	ADSS2	adenylosuccinate synthase 2	63.5	54.29	44.78	51.54	58.03	38.11
ENSG00000035720	STAP1	signal transducing adaptor family member 1	0	0	0	0	0	0
ENSG00000035862	TIMP2	TIMP metallopeptidase inhibitor 2	637.35	796.99	960.41	361.17	533.16	590.95
ENSG00000035928	RFC1	replication factor C subunit 1	32.06	17.08	18.38	20.9	22.43	18.95
ENSG00000036054	TBC1D23	TBC1 domain family member 23	35.19	30.33	27.19	23.9	27.89	27.71
ENSG00000036257	CUL3	cullin 3	44.35	34.83	43.64	45.95	39.3	50.12
ENSG00000036448	MYOM2	myomesin 2	0.45	2.32	0.22	2.31	4.57	2.72
ENSG00000036473	OTC	ornithine carbamoyltransferase	0	0	0	0	0	0
ENSG00000036530	CYP46A1	cytochrome P450 family 46 subfamily A member 1	0.2	0.24	0.37	0.75	0.2	0.24
ENSG00000036549	ZZZ3	zinc finger ZZ-type containing 3	16.97	29.42	17.78	15.88	18.57	14.62
ENSG00000036565	SLC18A1	solute carrier family 18 member A1	0	0	0	0	0	0
ENSG00000036672	USP2	ubiquitin specific peptidase 2	0	0.13	0.79	0.67	0.85	0.28
ENSG00000036828	CASR	calcium sensing receptor	0	0	0	0	0	0
ENSG00000037042	TUBG2	tubulin gamma 2	27.96	29.17	18.73	39.3	20.05	16.02
ENSG00000037241	RPL26L1	ribosomal protein L26 like 1	83.88	119.45	50.42	94.96	83.78	75.95
ENSG00000037280	FLT4	fms related receptor tyrosine kinase 4	0	0	0	0.08	0	0
ENSG00000037474	NSUN2	NOP2/Sun RNA methyltransferase 2	36.19	35.42	23.45	49.34	35.89	28.45
ENSG00000037637	FBXO42	F-box protein 42	9.72	11.69	5.59	12.66	8.6	7.1
ENSG00000037749	MFAP3	microfibril associated protein 3	17.01	14.52	14.47	12.56	20.85	17.66
ENSG00000037757	MRI1	methylthioribose-1-phosphate isomerase 1	16.87	15.79	12.71	22.11	14.04	14.31
ENSG00000037897	METTL1	methyltransferase like 1	14.61	16.64	10.35	23.52	16.08	12.9
ENSG00000037965	HOXC8	homeobox C8	33.89	22.96	19.52	8.16	6.71	11.63
ENSG00000038002	AGA	aspartylglucosaminidase	14.52	14.24	12.02	26.22	14.39	9.14
ENSG00000038210	PI4K2B	phosphatidylinositol 4-kinase type 2 beta	24.05	25.07	21.78	15.93	25.66	22.47
ENSG00000038219	BOD1L1	biorientation of chromosomes in cell division 1 like 1	22.51	16.88	16.29	18.65	16.55	18.96
ENSG00000038274	MAT2B	methionine adenosyltransferase 2B	39.71	42.58	38.88	40.38	42.14	44.03
ENSG00000038295	TLL1	tolloid like 1	0.1	0	0.74	1.67	2.02	0.45
ENSG00000038358	EDC4	enhancer of mRNA decapping 4	43.35	45.03	19.76	39.65	32.91	23.53
ENSG00000038382	TRIO	trio Rho guanine nucleotide exchange factor	335.22	191.68	112.26	158.69	104.76	86.94
ENSG00000038427	VCAN	versican	368.27	251.23	304.96	320.15	401.3	365.56
ENSG00000038532	CLEC16A	C-type lectin domain containing 16A	11.53	9.2	6.77	14.38	10.95	10.33
ENSG00000038945	MSR1	macrophage scavenger receptor 1	1.9	1.08	0.29	0.81	0.7	0.28
ENSG00000039068	CDH1	cadherin 1	0.5	0.27	0	0	0	0
ENSG00000039123	MTREX	Mtr4 exosome RNA helicase	28.33	24.31	18.33	23.53	27.2	21.63
ENSG00000039139	DNAH5	dynein axonemal heavy chain 5	0.31	0.45	0.12	0.22	0.8	0.27
ENSG00000039319	ZFYVE16	zinc finger FYVE-type containing 16	13.42	9.32	9.07	9.9	11.1	9.41
ENSG00000039523	RIPOR1	RHO family interacting cell polarization regulator 1	51.03	63.62	48.36	77.55	52.92	50.55
ENSG00000039537	C6	complement C6	0	0	0	0	0	0
ENSG00000039560	RAI14	retinoic acid induced 14	51.2	36.41	22.85	41.34	21.52	20.07
ENSG00000039600	SOX30	SRY-box transcription factor 30	0	0	0	0	0	0
ENSG00000039650	PNKP	polynucleotide kinase 3'-phosphatase	44.66	56.72	37.95	64.59	57.56	32.07
ENSG00000039987	BEST2	bestrophin 2	0.19	0	0	0	0	0
ENSG00000040199	PHLPP2	PH domain and leucine rich repeat protein phosphatase 2	6.1	5.64	4.33	7.51	7.28	5.24
ENSG00000040275	SPDL1	spindle apparatus coiled-coil protein 1	42.72	32.63	7.9	35.33	33.33	13.39
ENSG00000040341	STAU2	staufen double-stranded RNA binding protein 2	12.67	19.48	8.35	14	16.19	10.77
ENSG00000040487	SLC66A1	solute carrier family 66 member 1	12.79	19.83	16.91	20.94	15.13	8.93
ENSG00000040531	CTNS	cystinosin, lysosomal cystine transporter	11.8	19.3	23.6	12.49	15.86	21.85
ENSG00000040608	RTN4R	reticulon 4 receptor	0	0	0.21	0.91	0	0
ENSG00000040633	PHF23	PHD finger protein 23	50.93	38.72	36.39	44.14	42.93	43.99
ENSG00000040731	CDH10	cadherin 10	0.22	0	0	0	0	0
ENSG00000040933	INPP4A	inositol polyphosphate-4-phosphatase type I A	8.4	10.12	5.21	6.3	9.96	6.53
ENSG00000041353	RAB27B	RAB27B, member RAS oncogene family	1.95	16.02	43.61	3.55	6	6.47
ENSG00000041357	PSMA4	proteasome 20S subunit alpha 4	269.74	251.87	173.8	192.02	219.49	190.93
ENSG00000041515	MYO16	myosin XVI	0	0	0	0	0	0
ENSG00000041802	LSG1	large 60S subunit nuclear export GTPase 1	19.74	19.08	10.07	26.03	17.94	11.73
ENSG00000041880	PARP3	poly(ADP-ribose) polymerase family member 3	62.79	65.21	57.33	59.86	55.93	64.72
ENSG00000041982	TNC	tenascin C	97.93	83.8	65.98	252.65	245.33	161.39
ENSG00000041988	THAP3	THAP domain containing 3	19.37	16.48	15.37	16.07	15.87	13.43
ENSG00000042062	RIPOR3	RIPOR family member 3	10.04	8.81	12.64	5.92	4.05	6.9
ENSG00000042088	TDP1	tyrosyl-DNA phosphodiesterase 1	11.77	10.92	5.87	13.25	17.82	4.86
ENSG00000042286	AIFM2	apoptosis inducing factor mitochondria associated 2	16.32	19.52	21.24	21	20.03	19.11
ENSG00000042304	C2orf83	chromosome 2 open reading frame 83	0	0	0	0	0	0
ENSG00000042317	SPATA7	spermatogenesis associated 7	6.86	7.35	7.25	6.17	7.13	6.95
ENSG00000042429	MED17	mediator complex subunit 17	16.51	16.22	12.43	14.75	14.38	15.11
ENSG00000042445	RETSAT	retinol saturase	13.09	33.38	28.19	21.91	36.67	26.33
ENSG00000042493	CAPG	capping actin protein, gelsolin like	334.2	388.73	379.6	388.51	671.11	549.75
ENSG00000042753	AP2S1	adaptor related protein complex 2 subunit sigma 1	388.54	516.11	366.89	519.39	397.81	362.96
ENSG00000042781	USH2A	usherin	0.04	0.02	0	0.08	0.01	0
ENSG00000042813	ZPBP	zona pellucida binding protein	0	0	0	0	0	0
ENSG00000042832	TG	thyroglobulin	0.52	0.65	0.29	0.74	0.14	0.83
ENSG00000042980	ADAM28	ADAM metallopeptidase domain 28	0	0.68	0	0	0	0.02
ENSG00000043039	BARX2	BARX homeobox 2	0	0	0	0	0	0
ENSG00000043093	DCUN1D1	defective in cullin neddylation 1 domain containing 1	19.61	13.77	11.41	15.94	13.68	12.69
ENSG00000043143	JADE2	jade family PHD finger 2	37.78	57.75	27.02	29.08	45.28	25.46
ENSG00000043355	ZIC2	Zic family member 2	0	0	0	0	0.06	0.05
ENSG00000043462	LCP2	lymphocyte cytosolic protein 2	0	0	0	0	0	0.14
ENSG00000043514	TRIT1	tRNA isopentenyltransferase 1	10.14	9.21	11.74	10.96	10.48	10.51
ENSG00000043591	ADRB1	adrenoceptor beta 1	0	0	0	0	0	0
ENSG00000044012	GUCA2B	guanylate cyclase activator 2B	0	0	0	0	0	0
ENSG00000044090	CUL7	cullin 7	24.89	30.62	28.5	34.12	24.78	35.02
ENSG00000044115	CTNNA1	catenin alpha 1	259.76	205.64	160.39	248.46	236.25	196.69
ENSG00000044446	PHKA2	phosphorylase kinase regulatory subunit alpha 2	10.43	8.73	8.11	12.51	13.1	9.17
ENSG00000044459	CNTLN	centlein	8.24	6.79	7.12	5.66	6.51	6.55
ENSG00000044524	EPHA3	EPH receptor A3	0.15	0.76	0.41	0.34	0.75	0.4
ENSG00000044574	HSPA5	heat shock protein family A (Hsp70) member 5	340	281.84	249.69	361.82	313.05	328.16
ENSG00000046604	DSG2	desmoglein 2	0.24	0.14	0.18	0.34	0.83	0.08
ENSG00000046647	GEMIN8	gem nuclear organelle associated protein 8	29.32	26.16	27.2	29.88	21.04	24.02
ENSG00000046651	OFD1	OFD1 centriole and centriolar satellite protein	8.6	9.13	10.44	7.82	6.96	10.94
ENSG00000046653	GPM6B	glycoprotein M6B	0.45	0.15	0.17	0.42	2.08	2.97
ENSG00000046774	MAGEC2	MAGE family member C2	0	0	0	0	0	0
ENSG00000046889	PREX2	phosphatidylinositol-3,4,5-trisphosphate dependent Rac exchange factor 2	0	0.02	0.11	0.01	0.16	0.09
ENSG00000047056	WDR37	WD repeat domain 37	10.44	8.4	10.17	8.67	8.98	9.9
ENSG00000047188	YTHDC2	YTH domain containing 2	7.95	7.79	5.75	9.54	7.91	6.33
ENSG00000047230	CTPS2	CTP synthase 2	6.16	6.42	3.46	4.7	5.57	3.91
ENSG00000047249	ATP6V1H	ATPase H+ transporting V1 subunit H	65.89	52.69	46.02	62.61	45.09	69.38
ENSG00000047315	POLR2B	RNA polymerase II subunit B	75.09	46	41.62	46.84	45.51	40.89
ENSG00000047346	FAM214A	family with sequence similarity 214 member A	14.8	8.63	14.15	16.18	13.23	16.72
ENSG00000047365	ARAP2	ArfGAP with RhoGAP domain, ankyrin repeat and PH domain 2	0	0	0	0.18	0.11	0
ENSG00000047410	TPR	translocated promoter region, nuclear basket protein	53.01	34.15	28.95	28.88	27.75	24.43
ENSG00000047457	CP	ceruloplasmin	0	0.58	1.07	2.14	1.31	2.7
ENSG00000047578	KIAA0556	KIAA0556	12.29	7.81	16.59	10.82	11.36	10.53
ENSG00000047579	DTNBP1	dystrobrevin binding protein 1	12.78	13.81	15.94	14.85	14.41	13.69
ENSG00000047597	XK	X-linked Kx blood group	0	0	0	0.03	0.03	0.08
ENSG00000047617	ANO2	anoctamin 2	0	0	0	0	0	0.33
ENSG00000047621	C12orf4	chromosome 12 open reading frame 4	13.83	8.02	6.61	11.22	17.2	8.2
ENSG00000047634	SCML1	Scm polycomb group protein like 1	11.84	10.13	7.39	13.16	12.64	7.72
ENSG00000047644	WWC3	WWC family member 3	9.29	9.8	6.02	10.31	6.84	5.96
ENSG00000047648	ARHGAP6	Rho GTPase activating protein 6	17.92	24.21	24	9.43	15.74	12.37
ENSG00000047662	FAM184B	family with sequence similarity 184 member B	0	0	0	0	0	0
ENSG00000047849	MAP4	microtubule associated protein 4	201.47	209.82	176.81	209.82	190.65	210.88
ENSG00000047932	GOPC	golgi associated PDZ and coiled-coil motif containing	22.85	15.05	17.94	17.96	16.33	20.12
ENSG00000047936	ROS1	ROS proto-oncogene 1, receptor tyrosine kinase	0	0	0.07	0.04	0	0.19
ENSG00000048028	USP28	ubiquitin specific peptidase 28	12.63	14.73	12.05	12.64	11.34	12.44
ENSG00000048052	HDAC9	histone deacetylase 9	3.17	2.64	1.49	2.8	1.12	2.15
ENSG00000048140	TSPAN17	tetraspanin 17	66.05	71.16	31.65	64.27	63.44	48.4
ENSG00000048162	NOP16	NOP16 nucleolar protein	40.54	31.97	20.2	57.21	27.39	22.19
ENSG00000048342	CC2D2A	coiled-coil and C2 domain containing 2A	15.11	22.01	35.5	19.73	23.12	26.87
ENSG00000048392	RRM2B	ribonucleotide reductase regulatory TP53 inducible subunit M2B	33.67	25.45	26.6	34.04	34.16	31.71
ENSG00000048405	ZNF800	zinc finger protein 800	12.19	8.14	9.42	15.32	10.6	7.53
ENSG00000048462	TNFRSF17	TNF receptor superfamily member 17	0.39	0.45	0	0	0	0
ENSG00000048471	SNX29	sorting nexin 29	16.44	18.9	14.46	19.25	18.9	15.7
ENSG00000048540	LMO3	LIM domain only 3	0.61	2.09	8.33	0.45	1	6.91
ENSG00000048544	MRPS10	mitochondrial ribosomal protein S10	30.76	26.61	27.07	25.49	27.87	26.37
ENSG00000048545	GUCA1A	guanylate cyclase activator 1A	0	0	0	0	0	0.52
ENSG00000048649	RSF1	remodeling and spacing factor 1	22.26	13.64	14.12	9.4	13.14	11.31
ENSG00000048707	VPS13D	vacuolar protein sorting 13 homolog D	11.53	21.42	13.16	11.6	12.25	13.77
ENSG00000048740	CELF2	CUGBP Elav-like family member 2	9.43	9.38	19.93	4.88	6.05	9.35
ENSG00000048828	FAM120A	family with sequence similarity 120A	78.9	74.52	72.64	85.89	84.03	78.8
ENSG00000048991	R3HDM1	R3H domain containing 1	16.49	19.6	8.81	20.83	20.42	14.14
ENSG00000049089	COL9A2	collagen type IX alpha 2 chain	2.5	2.62	7.59	0.53	0.56	4.13
ENSG00000049130	KITLG	KIT ligand	35.3	26.55	24.94	22.9	27.68	21.87
ENSG00000049167	ERCC8	ERCC excision repair 8, CSA ubiquitin ligase complex subunit	6.8	5.02	4.51	4.38	6.85	5.36
ENSG00000049192	ADAMTS6	ADAM metallopeptidase with thrombospondin type 1 motif 6	11.99	11.95	5.84	9.56	5.72	4.78
ENSG00000049239	H6PD	hexose-6-phosphate dehydrogenase/glucose 1-dehydrogenase	29.32	38.06	42.03	30.04	30.9	36.73
ENSG00000049245	VAMP3	vesicle associated membrane protein 3	158.07	115.46	108.21	140.91	150.5	131.38
ENSG00000049246	PER3	period circadian regulator 3	9.08	12.85	14.57	10.89	15.89	12.27
ENSG00000049247	UTS2	urotensin 2	0	0.55	0	0	0	0
ENSG00000049249	TNFRSF9	TNF receptor superfamily member 9	0	0	0	0.44	0.42	0.02
ENSG00000049283	EPN3	epsin 3	0	0	0.54	0.09	0	0
ENSG00000049323	LTBP1	latent transforming growth factor beta binding protein 1	150.08	127.63	33.21	239.84	182.21	53.63
ENSG00000049449	RCN1	reticulocalbin 1	371.56	292.56	329.69	161.69	168.81	259.01
ENSG00000049540	ELN	elastin	69.77	130.32	178.14	721.82	155.08	78.07
ENSG00000049541	RFC2	replication factor C subunit 2	26.74	28.47	9.11	29.85	37.65	10.5
ENSG00000049618	ARID1B	AT-rich interaction domain 1B	20.89	21.81	24.35	24.65	17.26	22.32
ENSG00000049656	CLPTM1L	CLPTM1 like	126.9	88.6	105.07	124.65	97.28	98.59
ENSG00000049759	NEDD4L	NEDD4 like E3 ubiquitin protein ligase	10.37	15.29	12.54	15.78	8.98	16.96
ENSG00000049768	FOXP3	forkhead box P3	0.24	0.32	0	0.23	0.08	0
ENSG00000049769	PPP1R3F	protein phosphatase 1 regulatory subunit 3F	8.5	8.85	7.73	5.03	4.71	4.25
ENSG00000049860	HEXB	hexosaminidase subunit beta	175.69	210.97	254.73	163.87	170.56	164.92
ENSG00000049883	PTCD2	pentatricopeptide repeat domain 2	11.14	8.34	5.29	9.55	12.4	8.53
ENSG00000050030	NEXMIF	neurite extension and migration factor	0	0	0	0	0	0
ENSG00000050130	JKAMP	JNK1/MAPK8 associated membrane protein	74.17	48.64	35.44	55.11	39.85	50.5
ENSG00000050165	DKK3	dickkopf WNT signaling pathway inhibitor 3	132	265.54	489.65	41.52	95.19	170.51
ENSG00000050327	ARHGEF5	Rho guanine nucleotide exchange factor 5	5.03	9.67	9.01	7.35	8.29	7.16
ENSG00000050344	NFE2L3	nuclear factor, erythroid 2 like 3	0.66	0.67	0.93	2.15	0.84	1.82
ENSG00000050393	MCUR1	mitochondrial calcium uniporter regulator 1	18.26	12.54	9.48	13.91	12.57	10.83
ENSG00000050405	LIMA1	LIM domain and actin binding 1	124.68	91.27	142.4	87.15	102.89	81.08
ENSG00000050426	LETMD1	LETM1 domain containing 1	42.51	37.19	53.18	44.1	38.56	44.42
ENSG00000050438	SLC4A8	solute carrier family 4 member 8	3.82	3.67	0.84	9.43	4.34	1.15
ENSG00000050555	LAMC3	laminin subunit gamma 3	0	0.34	0	0.02	0	0
ENSG00000050628	PTGER3	prostaglandin E receptor 3	7.73	14.09	3.27	0.02	0	0.18
ENSG00000050730	TNIP3	TNFAIP3 interacting protein 3	1.64	1.12	0.86	2.3	1.33	2.52
ENSG00000050748	MAPK9	mitogen-activated protein kinase 9	24.41	21.27	20.4	25.61	20.33	22.15
ENSG00000050767	COL23A1	collagen type XXIII alpha 1 chain	0	0	0.15	0	0	0
ENSG00000050820	BCAR1	BCAR1 scaffold protein, Cas family member	36.69	43.9	34.33	51.29	37.26	34.41
ENSG00000051009	FAM160A2	family with sequence similarity 160 member A2	24.39	12.76	17.08	24	20.14	19.94
ENSG00000051108	HERPUD1	homocysteine inducible ER protein with ubiquitin like domain 1	75.5	68.2	83.39	63.16	81.03	73.95
ENSG00000051128	HOMER3	homer scaffold protein 3	132.87	161.26	89.7	120.15	129.64	108.3
ENSG00000051180	RAD51	RAD51 recombinase	15.21	8.59	4.11	17.65	14.2	1.85
ENSG00000051341	POLQ	DNA polymerase theta	3.02	3.14	0.11	4.05	4.82	0.76
ENSG00000051382	PIK3CB	phosphatidylinositol-4,5-bisphosphate 3-kinase catalytic subunit beta	9.38	6.79	4.09	8.24	11.24	5.33
ENSG00000051523	CYBA	cytochrome b-245 alpha chain	139.44	234.36	264	346.57	268.25	286.69
ENSG00000051596	THOC3	THO complex 3	41.61	38.31	17.79	47.13	54.01	30.08
ENSG00000051620	HEBP2	heme binding protein 2	51.69	40.61	40.1	37.26	20.41	29
ENSG00000051825	MPHOSPH9	M-phase phosphoprotein 9	15.9	11.09	3.88	21.34	14.01	11.77
ENSG00000052126	PLEKHA5	pleckstrin homology domain containing A5	11.14	10.68	11.04	8.14	8.88	12.48
ENSG00000052344	PRSS8	serine protease 8	0	0	0	0	0	0
ENSG00000052723	SIKE1	suppressor of IKBKE 1	14.88	15.28	18.5	18.18	16.1	16.57
ENSG00000052749	RRP12	ribosomal RNA processing 12 homolog	10.35	13.44	5.96	17.24	10.66	10.28
ENSG00000052795	FNIP2	folliculin interacting protein 2	9.52	7.35	20.62	7.33	8.11	16.42
ENSG00000052802	MSMO1	methylsterol monooxygenase 1	53.58	39.33	86.77	34.99	32.82	125.33
ENSG00000052841	TTC17	tetratricopeptide repeat domain 17	33.86	40.53	29.53	26.35	25.43	34.47
ENSG00000052850	ALX4	ALX homeobox 4	0	0	0.18	0	0.03	0.4
ENSG00000053108	FSTL4	follistatin like 4	0	0	0	0	0	0
ENSG00000053254	FOXN3	forkhead box N3	12.61	13.27	24.05	9.48	13.7	22.14
ENSG00000053328	METTL24	methyltransferase like 24	0	0	0	0	0	0
ENSG00000053371	AKR7A2	aldo-keto reductase family 7 member A2	57.73	77.91	80.57	80.84	102.21	100.26
ENSG00000053372	MRTO4	MRT4 homolog, ribosome maturation factor	33.96	29.14	17.97	36.52	27.14	17.7
ENSG00000053438	NNAT	neuronatin	1.12	1.72	0.65	1.92	1.32	3.39
ENSG00000053501	USE1	unconventional SNARE in the ER 1	33.25	37.91	35.07	45.63	45.9	40.09
ENSG00000053524	MCF2L2	MCF.2 cell line derived transforming sequence-like 2	0.1	0	0	0.1	0.06	0.05
ENSG00000053702	NRIP2	nuclear receptor interacting protein 2	0.7	0.22	0.38	0.87	0.32	0.39
ENSG00000053747	LAMA3	laminin subunit alpha 3	5.23	6.51	4.28	8.2	7.52	5.82
ENSG00000053770	AP5M1	adaptor related protein complex 5 subunit mu 1	20.56	18.42	14.78	19.69	17.98	16.71
ENSG00000053900	ANAPC4	anaphase promoting complex subunit 4	21.98	21.49	16.44	17.2	17.87	16.42
ENSG00000053918	KCNQ1	potassium voltage-gated channel subfamily Q member 1	0	0	0	0	0	0
ENSG00000054116	TRAPPC3	trafficking protein particle complex 3	78.13	82.72	64.45	82.08	78.01	65.79
ENSG00000054118	THRAP3	thyroid hormone receptor associated protein 3	58.29	59.66	45.43	58.63	68.13	54.87
ENSG00000054148	PHPT1	phosphohistidine phosphatase 1	220.42	311.11	379.4	306.35	331.92	365.66
ENSG00000054179	ENTPD2	ectonucleoside triphosphate diphosphohydrolase 2	0	0	0.14	0	0	0
ENSG00000054219	LY75	lymphocyte antigen 75	1.32	0.91	2.31	3.04	1.78	3.03
ENSG00000054267	ARID4B	AT-rich interaction domain 4B	12.32	11.45	9.78	10.07	9.28	10.74
ENSG00000054277	OPN3	opsin 3	12.96	11.29	4.6	11.03	7.53	4.05
ENSG00000054282	SDCCAG8	SHH signaling and ciliogenesis regulator SDCCAG8	41.78	48.46	18.9	27.1	20.4	18.13
ENSG00000054356	PTPRN	protein tyrosine phosphatase receptor type N	2.62	0.96	0.47	1.74	2.89	0.8
ENSG00000054392	HHAT	hedgehog acyltransferase	5.16	2.51	4.38	3.95	3.4	4.93
ENSG00000054523	KIF1B	kinesin family member 1B	17.01	15.32	14.11	15.58	17.14	14.7
ENSG00000054598	FOXC1	forkhead box C1	0.86	0.74	1.25	28.39	12.98	10.69
ENSG00000054611	TBC1D22A	TBC1 domain family member 22A	10.29	13.86	14.05	17.22	14.58	18.14
ENSG00000054654	SYNE2	spectrin repeat containing nuclear envelope protein 2	7.44	7.81	7.4	4.43	9.65	6.09
ENSG00000054690	PLEKHH1	pleckstrin homology, MyTH4 and FERM domain containing H1	0.34	0.6	0	0.36	1.07	0
ENSG00000054793	ATP9A	ATPase phospholipid transporting 9A (putative)	23.22	22.19	24.16	18.05	18.11	24.39
ENSG00000054796	SPO11	SPO11 initiator of meiotic double stranded breaks	0	0	0	0	0	0
ENSG00000054803	CBLN4	cerebellin 4 precursor	0	0	0	0	0	0
ENSG00000054938	CHRDL2	chordin like 2	0	0	0	0	0	0
ENSG00000054965	FAM168A	family with sequence similarity 168 member A	20.3	21.87	21.78	26.81	25.27	21.28
ENSG00000054967	RELT	RELT TNF receptor	3.58	2.39	1.32	4.34	3.98	1
ENSG00000054983	GALC	galactosylceramidase	14.8	13.1	17.3	14.65	18.31	20.34
ENSG00000055044	NOP58	NOP58 ribonucleoprotein	51.11	34.93	26.19	55.9	48.5	28.19
ENSG00000055070	SZRD1	SUZ RNA binding domain containing 1	131.89	119.72	81.77	134.56	125.34	108.84
ENSG00000055118	KCNH2	potassium voltage-gated channel subfamily H member 2	0	0	0	0.07	0	0.06
ENSG00000055130	CUL1	cullin 1	42.56	39.72	27.94	47.07	38.28	40.28
ENSG00000055147	FAM114A2	family with sequence similarity 114 member A2	16.79	11.22	13.03	17.14	18.64	12.89
ENSG00000055163	CYFIP2	cytoplasmic FMR1 interacting protein 2	1.29	3.08	0.98	3.3	2.97	1.87
ENSG00000055208	TAB2	TGF-beta activated kinase 1 (MAP3K7) binding protein 2	30.38	26.8	25.11	22.72	25.37	33.75
ENSG00000055211	GINM1	glycoprotein integral membrane 1	66.45	61.54	50.68	43.1	54.81	58.82
ENSG00000055332	EIF2AK2	eukaryotic translation initiation factor 2 alpha kinase 2	16.44	14.02	19.23	18.04	19.07	13.4
ENSG00000055483	USP36	ubiquitin specific peptidase 36	29.95	30.17	22.15	35.06	20.95	21.7
ENSG00000055609	KMT2C	lysine methyltransferase 2C	8.82	9.87	9.68	13.5	13.67	11.96
ENSG00000055732	MCOLN3	mucolipin 3	0.39	1.8	1.46	0.13	0.47	2.02
ENSG00000055813	CCDC85A	coiled-coil domain containing 85A	0	0.38	0	0.08	0.08	0.56
ENSG00000055917	PUM2	pumilio RNA binding family member 2	23.22	20.48	17.77	23.87	21.79	18.48
ENSG00000055950	MRPL43	mitochondrial ribosomal protein L43	110.93	108.25	94.89	135.91	95.71	94.9
ENSG00000055955	ITIH4	inter-alpha-trypsin inhibitor heavy chain 4	1.22	1.31	1.78	0.79	0.1	0.81
ENSG00000055957	ITIH1	inter-alpha-trypsin inhibitor heavy chain 1	0	0	0	0	0	0
ENSG00000056050	HPF1	histone PARylation factor 1	64.3	38.67	37.15	34.43	46.88	51.13
ENSG00000056097	ZFR	zinc finger RNA binding protein	56.08	44.19	36.07	53.4	50.84	37.31
ENSG00000056277	ZNF280C	zinc finger protein 280C	2.71	2.19	2.16	2.15	2.02	3.08
ENSG00000056291	NPFFR2	neuropeptide FF receptor 2	0	0	0	0	0	0
ENSG00000056487	PHF21B	PHD finger protein 21B	0	0	0	0.05	0	0
ENSG00000056558	TRAF1	TNF receptor associated factor 1	2.51	2.72	2.74	3.14	3.05	2.16
ENSG00000056586	RC3H2	ring finger and CCCH-type domains 2	13.05	13.56	10.62	17.54	16.59	13.81
ENSG00000056736	IL17RB	interleukin 17 receptor B	0.74	1.35	0.68	1.4	0.52	0.82
ENSG00000056972	TRAF3IP2	TRAF3 interacting protein 2	51.97	60.15	71.61	38.45	38.67	72.41
ENSG00000056998	GYG2	glycogenin 2	1.58	1.9	2.05	0.16	0.88	1.32
ENSG00000057019	DCBLD2	discoidin, CUB and LCCL domain containing 2	276.37	233.26	88.38	221.42	205.96	81.99
ENSG00000057149	SERPINB3	serpin family B member 3	0	0	0	0	0	0
ENSG00000057252	SOAT1	sterol O-acyltransferase 1	38.08	19.61	21.59	25.32	25.54	19
ENSG00000057294	PKP2	plakophilin 2	0	0	0	0	0	0
ENSG00000057468	MSH4	mutS homolog 4	0	0	0	0.05	0	0
ENSG00000057593	F7	coagulation factor VII	0	0	0	0	0.32	0.05
ENSG00000057608	GDI2	GDP dissociation inhibitor 2	216.67	164.72	193.98	175.62	175.37	185.88
ENSG00000057657	PRDM1	PR/SET domain 1	1.22	1.68	1.86	1.81	1.54	2.22
ENSG00000057663	ATG5	autophagy related 5	21.29	16.04	15.3	14.83	17.05	13.76
ENSG00000057704	TMCC3	transmembrane and coiled-coil domain family 3	0.66	0.45	0.14	1.05	0.97	0.1
ENSG00000057757	PITHD1	PITH domain containing 1	36.96	32.45	30.71	41.48	48.78	42.18
ENSG00000057935	MTA3	metastasis associated 1 family member 3	17.01	21.25	17.15	20.89	20.13	19.57
ENSG00000058056	USP13	ubiquitin specific peptidase 13	10.81	9.38	3.25	13.43	10.77	7.17
ENSG00000058063	ATP11B	ATPase phospholipid transporting 11B (putative)	18.09	20.3	20.78	17.72	17.93	13.83
ENSG00000058085	LAMC2	laminin subunit gamma 2	2.86	4.72	2.69	2.44	5.21	2.57
ENSG00000058091	CDK14	cyclin dependent kinase 14	18.43	15.7	16.33	25.64	23.68	23.21
ENSG00000058262	SEC61A1	SEC61 translocon subunit alpha 1	266.36	223.7	212.81	344.61	255.33	273.03
ENSG00000058272	PPP1R12A	protein phosphatase 1 regulatory subunit 12A	57.12	35.56	31.86	42.16	37.32	33.13
ENSG00000058335	RASGRF1	Ras protein specific guanine nucleotide releasing factor 1	0	0	0.12	0	0	0
ENSG00000058404	CAMK2B	calcium/calmodulin dependent protein kinase II beta	6.87	3.01	0	5.79	0.75	0.18
ENSG00000058453	CROCC	ciliary rootlet coiled-coil, rootletin	11.67	21.15	20.93	21.17	10.21	13.07
ENSG00000058600	POLR3E	RNA polymerase III subunit E	28.47	20.52	15.34	25.6	14.35	20.06
ENSG00000058668	ATP2B4	ATPase plasma membrane Ca2+ transporting 4	145.68	134.03	145.61	192.78	200.32	130.04
ENSG00000058673	ZC3H11A	zinc finger CCCH-type containing 11A	58.88	40.96	42.74	46.05	41.3	47.77
ENSG00000058729	RIOK2	RIO kinase 2	18.23	11.71	13.62	19.69	13.17	11.85
ENSG00000058799	YIPF1	Yip1 domain family member 1	16.83	17.51	9.79	20.54	16.74	17.39
ENSG00000058804	NDC1	NDC1 transmembrane nucleoporin	12.2	10.73	4.18	13.5	15.86	5.7
ENSG00000058866	DGKG	diacylglycerol kinase gamma	5.26	1.64	0.03	4.57	1.83	2.28
ENSG00000059122	FLYWCH1	FLYWCH-type zinc finger 1	29.67	39.1	42.96	45.68	39.64	43.51
ENSG00000059145	UNKL	unk like zinc finger	9.88	10.79	9.66	12.03	11.24	11.64
ENSG00000059377	TBXAS1	thromboxane A synthase 1	5.09	2.97	1.75	16.07	3.14	2.06
ENSG00000059378	PARP12	poly(ADP-ribose) polymerase family member 12	14.63	9.15	12.37	13.37	11.08	9.63
ENSG00000059573	ALDH18A1	aldehyde dehydrogenase 18 family member A1	30.9	29.07	30.14	37.98	35.08	33.61
ENSG00000059588	TARBP1	TAR (HIV-1) RNA binding protein 1	25.03	14.58	6.68	17.24	19.54	11.55
ENSG00000059691	GATB	glutamyl-tRNA amidotransferase subunit B	14.84	15.12	16.06	18.88	18.52	17.49
ENSG00000059728	MXD1	MAX dimerization protein 1	2.88	2.47	1.66	3.22	2.27	1.53
ENSG00000059758	CDK17	cyclin dependent kinase 17	18.77	12.84	9.52	17.52	14.18	15.86
ENSG00000059769	DNAJC25	DnaJ heat shock protein family (Hsp40) member C25	8.03	6.43	8.45	7.08	6.69	7.47
ENSG00000059804	SLC2A3	solute carrier family 2 member 3	54.79	42.91	42.83	30.11	18.61	24.69
ENSG00000059915	PSD	pleckstrin and Sec7 domain containing	0.62	0.98	1.11	1.34	0.86	1.58
ENSG00000060069	CTDP1	CTD phosphatase subunit 1	10.51	11.75	9.8	12.24	11.43	10.62
ENSG00000060138	YBX3	Y-box binding protein 3	244.15	183.58	193.95	131.19	137.56	153.63
ENSG00000060140	STYK1	serine/threonine/tyrosine kinase 1	1.91	2.13	0.13	0.92	0.26	0.33
ENSG00000060237	WNK1	WNK lysine deficient protein kinase 1	50.51	54.68	61.88	66.07	58.88	67.16
ENSG00000060303	RPS17P5		0	0	0	0	0	0
ENSG00000060339	CCAR1	cell division cycle and apoptosis regulator 1	38.23	31.91	18.44	34.78	29.19	23.44
ENSG00000060491	OGFR	opioid growth factor receptor	31.69	42.82	34.17	51.88	46.61	34.65
ENSG00000060558	GNA15	G protein subunit alpha 15	0	0.57	0	0	0	0
ENSG00000060566	CREB3L3	cAMP responsive element binding protein 3 like 3	0	0	0.07	0	0	0
ENSG00000060642	PIGV	phosphatidylinositol glycan anchor biosynthesis class V	11.29	11.78	17.95	13.3	11.46	13.01
ENSG00000060656	PTPRU	protein tyrosine phosphatase receptor type U	38.71	21.34	24.14	27.71	28.2	46.74
ENSG00000060688	SNRNP40	small nuclear ribonucleoprotein U5 subunit 40	25.9	35.51	13.57	25.71	34.73	21.33
ENSG00000060709	RIMBP2	RIMS binding protein 2	0	0	0.29	0	0.03	0.51
ENSG00000060718	COL11A1	collagen type XI alpha 1 chain	4.06	1.42	1.03	16.64	0.95	1.03
ENSG00000060749	QSER1	glutamine and serine rich 1	14.31	9.71	8.57	13.39	12.87	11.57
ENSG00000060762	MPC1	mitochondrial pyruvate carrier 1	39.36	35.8	25.53	28.91	33	32.17
ENSG00000060971	ACAA1	acetyl-CoA acyltransferase 1	38.18	44.19	35.74	62.61	45.04	41.27
ENSG00000060982	BCAT1	branched chain amino acid transaminase 1	25.2	19.69	14.23	16.95	17.21	8.04
ENSG00000061273	HDAC7	histone deacetylase 7	83.52	95.73	93.35	66.59	77.06	65.65
ENSG00000061337	LZTS1	leucine zipper tumor suppressor 1	1.95	2.18	2.28	5.73	5.84	3.91
ENSG00000061455	PRDM6	PR/SET domain 6	0.34	0.06	0.52	1.06	1.37	1.03
ENSG00000061492	WNT8A	Wnt family member 8A	0	0	0	0	0	0
ENSG00000061656	SPAG4	sperm associated antigen 4	1.96	2.63	1.68	1.6	1.74	2.19
ENSG00000061676	NCKAP1	NCK associated protein 1	75.55	62.16	58.95	66.2	64.16	61.18
ENSG00000061794	MRPS35	mitochondrial ribosomal protein S35	47.89	31.9	30.64	38.42	38.18	36.96
ENSG00000061918	GUCY1B1	guanylate cyclase 1 soluble subunit beta 1	0.73	1	1.94	0.64	0.95	0.25
ENSG00000061936	SFSWAP	splicing factor SWAP	27.8	22.37	19.02	28.64	20.39	18.76
ENSG00000061938	TNK2	tyrosine kinase non receptor 2	14.49	16.43	9.06	33.23	17.76	11.65
ENSG00000061987	MON2	MON2 homolog, regulator of endosome-to-Golgi trafficking	23.22	15.6	15.99	20.16	19.06	21.97
ENSG00000062038	CDH3	cadherin 3	0	0	0	1.04	0.13	0.45
ENSG00000062096	ARSF	arylsulfatase F	0	0	0	0	0	0.08
ENSG00000062194	GPBP1	GC-rich promoter binding protein 1	34.45	25.06	22.12	28.77	24.09	24.44
ENSG00000062282	DGAT2	diacylglycerol O-acyltransferase 2	90.38	51.14	18.5	56.9	57.09	46.05
ENSG00000062370	ZNF112	zinc finger protein 112	2.53	3.11	2.83	2.14	2.7	2.23
ENSG00000062485	CS	citrate synthase	121.05	105.55	78.42	124.9	120.53	105.03
ENSG00000062524	LTK	leukocyte receptor tyrosine kinase	0.1	0.12	0.07	0.44	0.06	0.44
ENSG00000062582	MRPS24	mitochondrial ribosomal protein S24	103.53	181.75	234.34	167.16	170.97	181.5
ENSG00000062598	ELMO2	engulfment and cell motility 2	36.41	32.26	25.02	28.34	27.73	23.25
ENSG00000062650	WAPL	WAPL cohesin release factor	15.48	14.27	10.07	21.21	15.6	13.8
ENSG00000062716	VMP1	vacuole membrane protein 1	78.82	79.53	54.89	65.95	83.71	67.22
ENSG00000062725	APPBP2	amyloid beta precursor protein binding protein 2	14.42	16.47	21.46	20.46	19.17	17.31
ENSG00000062822	POLD1	DNA polymerase delta 1, catalytic subunit	18.94	24.56	9.18	40.02	24.88	10.5
ENSG00000063015	SEZ6	seizure related 6 homolog	0	0	0	0	0	0
ENSG00000063046	EIF4B	eukaryotic translation initiation factor 4B	210.43	219.29	341.72	173.74	183.06	304.97
ENSG00000063127	SLC6A16	solute carrier family 6 member 16	0.35	0	0.06	0.84	0	0.26
ENSG00000063169	BICRA	BRD4 interacting chromatin remodeling complex associated protein	5.21	7.13	5.36	6.62	7.04	5.24
ENSG00000063176	SPHK2	sphingosine kinase 2	23.59	23.37	15.32	36.57	25.44	19.69
ENSG00000063177	RPL18	ribosomal protein L18	1035.68	1312.7	1539.59	1160.28	1145.24	1491.22
ENSG00000063180	CA11	carbonic anhydrase 11	0.77	8.8	7.87	2.01	1.88	7.6
ENSG00000063241	ISOC2	isochorismatase domain containing 2	63.53	52.69	65.33	76.22	54.41	69.33
ENSG00000063244	U2AF2	U2 small nuclear RNA auxiliary factor 2	160.89	176.49	119.15	248.91	216.39	141.62
ENSG00000063245	EPN1	epsin 1	165.32	263.39	169.63	208.58	237.72	210.52
ENSG00000063322	MED29	mediator complex subunit 29	29.14	31.1	30.67	32.31	35.23	31.29
ENSG00000063438	AHRR		4.76	5.95	5.56	4.08	2.31	3.43
ENSG00000063515	GSC2	goosecoid homeobox 2	0	0	0	0	0	0
ENSG00000063587	ZNF275	zinc finger protein 275	5.56	6.83	6.21	5.19	4.97	5.67
ENSG00000063587	ZNF275	uncharacterized LOC105373378	5.56	6.83	6.21	5.19	4.97	5.67
ENSG00000063601	MTMR1	myotubularin related protein 1	13.34	14.56	12.1	13.94	9.27	7.89
ENSG00000063660	GPC1	glypican 1	94.47	118.84	158.17	101.09	95.17	147.16
ENSG00000063761	ADCK1	aarF domain containing kinase 1	4.13	5.38	5.86	6.15	4.56	6.14
ENSG00000063854	HAGH	hydroxyacylglutathione hydrolase	22.59	41.43	15.68	56.86	48.13	18.65
ENSG00000063978	RNF4	ring finger protein 4	38.1	33.47	22.75	42.95	35.69	23.59
ENSG00000064012	CASP8	caspase 8	13.79	12.78	14.78	12.35	14.23	15
ENSG00000064042	LIMCH1	LIM and calponin homology domains 1	5.89	2.03	1.67	1.95	3.12	6.65
ENSG00000064102	INTS13	integrator complex subunit 13	25.95	15.34	11.37	29.52	26.89	21.55
ENSG00000064115	TM7SF3	transmembrane 7 superfamily member 3	69.93	95.06	25.88	66.36	76.89	45.38
ENSG00000064195	DLX3	distal-less homeobox 3	15.64	5.74	9.41	37.47	32.18	37.74
ENSG00000064199	SPA17	sperm autoantigenic protein 17	4.55	3.85	1.96	7.1	5.09	3.05
ENSG00000064201	TSPAN32	tetraspanin 32	1.51	0.49	0.52	0.15	0.68	0.96
ENSG00000064205	CCN5	cellular communication network factor 5	22.29	157.27	645.68	26.73	182.26	269.85
ENSG00000064218	DMRT3	doublesex and mab-3 related transcription factor 3	0.07	0	0	0	0.07	0
ENSG00000064225	ST3GAL6	ST3 beta-galactoside alpha-2,3-sialyltransferase 6	2.86	1.37	1.62	0.64	1.74	1.63
ENSG00000064270	ATP2C2	ATPase secretory pathway Ca2+ transporting 2	3.65	0.3	0.63	0.41	0.26	0.71
ENSG00000064300	NGFR	nerve growth factor receptor	1.58	0.18	0.41	2.11	2.04	1.31
ENSG00000064309	CDON	cell adhesion associated, oncogene regulated	8.22	19.57	28.16	10.99	14.9	14.35
ENSG00000064313	TAF2	TATA-box binding protein associated factor 2	24.12	15.16	13.04	19.72	15.14	14.4
ENSG00000064393	HIPK2	homeodomain interacting protein kinase 2	12.01	7.39	7.12	19.32	10.93	10.46
ENSG00000064419	TNPO3	transportin 3	25.54	25.91	21.04	30.61	26.69	22
ENSG00000064489	BORCS8-MEF2B		2.57	0.82	0	0	0.02	3.12
ENSG00000064490	RFXANK	regulatory factor X associated ankyrin containing protein	52.1	63.7	61.39	86.64	62.38	63.25
ENSG00000064545	TMEM161A	transmembrane protein 161A	14.06	15.4	12.51	17.62	14.36	15.53
ENSG00000064547	LPAR2	lysophosphatidic acid receptor 2	2.89	1.62	1.25	3.14	0.74	0.36
ENSG00000064601	CTSA	cathepsin A	213.72	375.64	651.84	206.25	366.37	475.62
ENSG00000064607	SUGP2	SURP and G-patch domain containing 2	50.87	41.4	25.29	62.23	40.21	26.24
ENSG00000064651	SLC12A2	solute carrier family 12 member 2	5.67	6.25	5.73	8.23	4.62	16.22
ENSG00000064652	SNX24	sorting nexin 24	17.3	12.56	8.41	16.19	16.91	8.14
ENSG00000064655	EYA2	EYA transcriptional coactivator and phosphatase 2	0.44	0	1.37	1.07	2.8	6.76
ENSG00000064666	CNN2	calponin 2	57.15	87.07	85.14	108.79	61.79	54.35
ENSG00000064687	ABCA7	ATP binding cassette subfamily A member 7	2.4	5.6	9.05	15.07	12.63	4.87
ENSG00000064692	SNCAIP	synuclein alpha interacting protein	1.17	0.25	0.94	1.53	0.71	0.39
ENSG00000064703	DDX20	DEAD-box helicase 20	9.83	7.9	4.24	10.41	7.79	4.08
ENSG00000064726	BTBD1	BTB domain containing 1	73.19	58.61	50.67	55.07	60.54	59.69
ENSG00000064763	FAR2	fatty acyl-CoA reductase 2	20.73	20.31	12.13	13.83	21.3	10.23
ENSG00000064787	BCAS1	brain enriched myelin associated protein 1	0.03	0.3	0.06	0	0.06	0.22
ENSG00000064835	POU1F1	POU class 1 homeobox 1	0	0.15	0	0	0	0
ENSG00000064886	CHI3L2	chitinase 3 like 2	3.88	6.04	42.48	4.1	12.86	71.21
ENSG00000064932	SBNO2	strawberry notch homolog 2	39.53	61.37	41.34	68.28	62.63	39.9
ENSG00000064933	PMS1	PMS1 homolog 1, mismatch repair system component	10.3	10.91	5.71	13.12	10.06	9.32
ENSG00000064961	HMG20B	high mobility group 20B	93.38	146.45	100.82	120.61	111.82	105.75
ENSG00000064989	CALCRL	calcitonin receptor like receptor	0.19	0.5	1.33	1.02	1.92	2.69
ENSG00000064995	TAF11	TATA-box binding protein associated factor 11	15.88	9.67	11.97	13.1	15.28	12.76
ENSG00000064999	ANKS1A	ankyrin repeat and sterile alpha motif domain containing 1A	7.02	6.46	6.87	7.86	6.48	6.74
ENSG00000065000	AP3D1	adaptor related protein complex 3 subunit delta 1	93.54	89.39	62.32	115.38	81.54	75.28
ENSG00000065029	ZNF76	zinc finger protein 76	24.02	26.7	22.36	25.79	23.93	20.1
ENSG00000065054	SLC9A3R2	SLC9A3 regulator 2	14.95	20.17	16.25	67.77	18.44	27.55
ENSG00000065057	NTHL1	nth like DNA glycosylase 1	13.32	24.25	18.06	22.25	21.87	15.3
ENSG00000065060	UHRF1BP1	UHRF1 binding protein 1	1.17	1.94	1.22	1.93	2.24	1.21
ENSG00000065135	GNAI3	G protein subunit alpha i3	26.22	21.34	17.27	18.65	22.43	21.62
ENSG00000065150	IPO5	importin 5	251.5	286.47	211.57	107.89	157.53	136.29
ENSG00000065154	OAT	ornithine aminotransferase	153.27	121.45	157.34	124.17	123.17	170.35
ENSG00000065183	WDR3	WD repeat domain 3	12.18	10.75	3.54	15.9	7.46	10.09
ENSG00000065243	PKN2	protein kinase N2	18.6	14.48	12.64	10.27	13.14	12.83
ENSG00000065268	WDR18	WD repeat domain 18	39.11	46.09	34.28	50.44	36.15	43.24
ENSG00000065308	TRAM2	translocation associated membrane protein 2	71.71	90.57	120.24	107.76	87.8	88.42
ENSG00000065320	NTN1	netrin 1	0.64	0.8	0.53	3.02	3.7	2.84
ENSG00000065325	GLP2R	glucagon like peptide 2 receptor	0	0	0	0	0	0
ENSG00000065328	MCM10	minichromosome maintenance 10 replication initiation factor	5.3	5.75	0.07	7.49	6.89	2.36
ENSG00000065357	DGKA	diacylglycerol kinase alpha	97.42	50.1	59.61	109.17	66.25	73.3
ENSG00000065361	ERBB3	erb-b2 receptor tyrosine kinase 3	0.69	0.72	0.44	0.43	0.27	0.82
ENSG00000065371	ROPN1	rhophilin associated tail protein 1	0	0	0	0.82	0	1.11
ENSG00000065413	ANKRD44	ankyrin repeat domain 44	1.8	1.49	1.31	1.81	3.99	1.49
ENSG00000065427	KARS1	lysyl-tRNA synthetase 1	99.12	79.97	71.84	90.4	89.62	74.89
ENSG00000065457	ADAT1	adenosine deaminase tRNA specific 1	34.75	29.36	11.91	38.01	35.13	14.75
ENSG00000065485	PDIA5	protein disulfide isomerase family A member 5	53.2	43.6	71.54	65.04	74.81	129.86
ENSG00000065491	TBC1D22B	TBC1 domain family member 22B	3.05	3.79	4.65	4.25	3.26	4.51
ENSG00000065518	NDUFB4	NADH:ubiquinone oxidoreductase subunit B4	235.3	178.43	192.48	193.14	185.84	202.74
ENSG00000065526	SPEN	spen family transcriptional repressor	14.01	13.67	8.5	15.81	7.4	10.95
ENSG00000065534	MYLK	myosin light chain kinase	36.28	38.57	25.55	70.85	141.94	87.03
ENSG00000065548	ZC3H15	zinc finger CCCH-type containing 15	55.37	44.9	34.71	50.91	47.47	40.13
ENSG00000065559	MAP2K4	mitogen-activated protein kinase kinase 4	18.78	11.54	10.55	17.94	17.62	16.97
ENSG00000065600	PACC1	proton activated chloride channel 1	6.48	6.12	1.88	6.05	4.73	3.24
ENSG00000065609	SNAP91	synaptosome associated protein 91	0	0	0	0	0	0
ENSG00000065613	SLK	STE20 like kinase	29.09	25.08	18.65	23.02	24.55	22.27
ENSG00000065615	CYB5R4	cytochrome b5 reductase 4	2.12	5.4	4.79	8.08	4.69	8.94
ENSG00000065618	COL17A1	collagen type XVII alpha 1 chain	1.61	2.94	0.19	1.82	2.14	2.04
ENSG00000065621	GSTO2	glutathione S-transferase omega 2	3.12	1.49	0.54	4.56	2.22	2.11
ENSG00000065665	SEC61A2	SEC61 translocon subunit alpha 2	9.2	9.85	4.96	5.6	7.03	4.79
ENSG00000065675	PRKCQ	protein kinase C theta	0	0	0	0	0	0
ENSG00000065717	TLE2	TLE family member 2, transcriptional corepressor	0.6	1.82	3.63	1.78	2.5	2.06
ENSG00000065802	ASB1	ankyrin repeat and SOCS box containing 1	32.78	28.16	16.82	28.31	21.73	19.34
ENSG00000065809	FAM107B	family with sequence similarity 107 member B	7.21	6.72	5.98	36	6.25	8.85
ENSG00000065833	ME1	malic enzyme 1	13.73	8.73	21.68	9.59	5.9	16.64
ENSG00000065882	TBC1D1	TBC1 domain family member 1	59.08	21.32	38.48	50.81	18.87	36.33
ENSG00000065883	CDK13	cyclin dependent kinase 13	29.33	16.48	12.96	21.17	18.61	14.57
ENSG00000065911	MTHFD2	methylenetetrahydrofolate dehydrogenase (NADP+ dependent) 2, methenyltetrahydrofolate cyclohydrolase	31.02	25.25	32.08	37.23	29.43	20.17
ENSG00000065923	SLC9A7	solute carrier family 9 member A7	15.97	21.07	3.3	19.37	14.74	3.77
ENSG00000065970	FOXJ2	forkhead box J2	11.7	12.34	8.9	13.54	11.02	8.93
ENSG00000065978	YBX1	Y-box binding protein 1	1036.11	1264.79	817.14	1142.47	1109.91	993.17
ENSG00000065989	PDE4A	phosphodiesterase 4A	7.53	13.31	12.88	8.61	7.42	12.29
ENSG00000066027	PPP2R5A	protein phosphatase 2 regulatory subunit B'alpha	24.23	22.64	19.81	15.21	15.44	21.22
ENSG00000066032	CTNNA2	catenin alpha 2	0	0	0	1.01	0.54	0.16
ENSG00000066044	ELAVL1	ELAV like RNA binding protein 1	48.05	58.12	34.01	66.58	58.3	40.58
ENSG00000066056	TIE1	tyrosine kinase with immunoglobulin like and EGF like domains 1	0	0.47	0.04	0	0.55	0
ENSG00000066084	DIP2B	disco interacting protein 2 homolog B	5.92	7.46	6.23	4.78	6.24	6.4
ENSG00000066117	SMARCD1	SWI/SNF related, matrix associated, actin dependent regulator of chromatin, subfamily d, member 1	43.65	47.7	24.91	43.77	30.45	25.81
ENSG00000066135	KDM4A	lysine demethylase 4A	17.02	18.6	13.77	18.65	18.77	17.04
ENSG00000066136	NFYC	nuclear transcription factor Y subunit gamma	31.49	24.47	30.46	34.8	33.51	33.31
ENSG00000066185	ZMYND12	zinc finger MYND-type containing 12	0.75	1.17	1.52	1.24	2.48	3.93
ENSG00000066230	SLC9A3	solute carrier family 9 member A3	2.03	1.88	2.18	1.38	1.71	2.18
ENSG00000066248	NGEF	neuronal guanine nucleotide exchange factor	32.29	33.54	4.62	37.37	53.51	17.9
ENSG00000066279	ASPM	assembly factor for spindle microtubules	21.97	16.57	1.8	20.59	32.19	6.16
ENSG00000066294	CD84	CD84 molecule	0	0	0	0	0	0
ENSG00000066322	ELOVL1	ELOVL fatty acid elongase 1	182.26	187.67	123.22	247.89	190.6	162.95
ENSG00000066336	SPI1	Spi-1 proto-oncogene	0	0	0.53	0.3	0	0
ENSG00000066379	ZNRD1	zinc ribbon domain containing 1	15.31	20.51	11.27	22.38	18.62	19.04
ENSG00000066382	MPPED2	metallophosphoesterase domain containing 2	0	0	0	0.64	0.28	0.86
ENSG00000066405	CLDN18	claudin 18	0	0.31	0	0.09	0.1	0
ENSG00000066422	ZBTB11	zinc finger and BTB domain containing 11	9.69	8.02	9.18	9.13	8.36	7.98
ENSG00000066427	ATXN3	ataxin 3	16.83	14.59	16.77	14.54	14.97	17.36
ENSG00000066455	GOLGA5	golgin A5	39.2	27.91	34.26	31.46	31.53	33
ENSG00000066468	FGFR2	fibroblast growth factor receptor 2	0.29	0	0.37	0.2	1.21	2.48
ENSG00000066557	LRRC40	leucine rich repeat containing 40	12.82	8.2	5.33	10.04	10.82	8.11
ENSG00000066583	ISOC1	isochorismatase domain containing 1	12.35	9.85	5.43	8.8	7.74	5.08
ENSG00000066629	EML1	EMAP like 1	22.71	22.23	41.16	42.19	41.38	37.64
ENSG00000066651	TRMT11	tRNA methyltransferase 11 homolog	13.07	11.92	11.14	16.48	14.39	9.04
ENSG00000066654	THUMPD1	THUMP domain containing 1	14.99	10.97	11.86	13.68	12.62	11.05
ENSG00000066697	MSANTD3	Myb/SANT DNA binding domain containing 3	95.36	60.33	68.55	60.77	46.49	61.3
ENSG00000066735	KIF26A	kinesin family member 26A	0	0	0	0	0	0
ENSG00000066739	ATG2B	autophagy related 2B	9.82	8.36	11.54	9.16	8.23	10.98
ENSG00000066777	ARFGEF1	ADP ribosylation factor guanine nucleotide exchange factor 1	21.16	17.39	16.64	16.13	24.88	18.62
ENSG00000066813	ACSM2B	acyl-CoA synthetase medium chain family member 2B	0	0	0	0	0	0
ENSG00000066827	ZFAT	zinc finger and AT-hook domain containing	4.01	4.88	5.06	4.79	4.26	5.36
ENSG00000066855	MTFR1	mitochondrial fission regulator 1	24.56	16.64	12.13	18.5	19.99	15.81
ENSG00000066923	STAG3	stromal antigen 3	1.4	2.87	1.11	1.4	3.91	1.91
ENSG00000066926	FECH	ferrochelatase	21.29	12.52	23.15	17.49	15.84	32.16
ENSG00000066933	MYO9A	myosin IXA	14.09	11.59	10.43	13.71	10.32	10.47
ENSG00000067048	DDX3Y	DEAD-box helicase 3 Y-linked	0	0	0	0	0	0
ENSG00000067057	PFKP	phosphofructokinase, platelet	167.12	142.15	63.74	310.18	174.48	152.35
ENSG00000067064	IDI1	isopentenyl-diphosphate delta isomerase 1	35.84	26.75	52.86	28.12	25.94	69.36
ENSG00000067066	SP100	SP100 nuclear antigen	90.04	97.09	110.39	76.66	73.33	71.7
ENSG00000067082	KLF6	Kruppel like factor 6	99.39	64.53	48.78	57.62	61.93	44.36
ENSG00000067113	PLPP1	phospholipid phosphatase 1	50.72	54.26	143.14	39.21	89.14	165.33
ENSG00000067141	NEO1	neogenin 1	25.95	20.17	20.87	23.75	16.77	23.92
ENSG00000067167	TRAM1	translocation associated membrane protein 1	129.02	110.9	121.63	98.08	95.76	93.42
ENSG00000067177	PHKA1	phosphorylase kinase regulatory subunit alpha 1	1.37	1.09	0.82	4.1	2.26	0.87
ENSG00000067182	TNFRSF1A	TNF receptor superfamily member 1A	195.9	252.78	315.04	206.38	237.17	296
ENSG00000067191	CACNB1	calcium voltage-gated channel auxiliary subunit beta 1	6.05	5.64	7.02	8.88	6.66	6.97
ENSG00000067208	EVI5	ecotropic viral integration site 5	7.81	8.23	11.44	10.06	4.8	8.46
ENSG00000067221	STOML1	stomatin like 1	19.24	35.64	16.92	53.42	36.64	18.98
ENSG00000067225	PKM	pyruvate kinase M1/2	1931.63	1951.86	1335.82	2679.34	2648.43	2151.71
ENSG00000067248	DHX29	DExH-box helicase 29	23.05	19.48	13.29	26.43	23.24	16.15
ENSG00000067334	DNTTIP2	deoxynucleotidyltransferase terminal interacting protein 2	36.79	26.95	17.22	33.55	35.7	23.14
ENSG00000067365	METTL22	methyltransferase like 22	18.47	17.14	17.09	20.97	19.66	16.05
ENSG00000067369	TP53BP1	tumor protein p53 binding protein 1	27.89	21.63	27.4	30.18	22.5	31.59
ENSG00000067445	TRO	trophinin	12.32	6.41	21.87	15.17	4.94	19.84
ENSG00000067533	RRP15	ribosomal RNA processing 15 homolog	6.25	3.69	4.6	5.38	9.18	6.12
ENSG00000067560	RHOA	ras homolog family member A	718.83	696.15	654.81	714.49	798.37	806.6
ENSG00000067596	DHX8	DEAH-box helicase 8	22.11	19.34	20.07	29.24	24.86	23.59
ENSG00000067601	PMS2P4	PMS1 homolog 2, mismatch repair system component pseudogene 4	1.03	2.39	0.7	2.98	2.81	1.51
ENSG00000067606	PRKCZ	protein kinase C zeta	2.44	2.25	1.98	0.66	1.06	1.91
ENSG00000067646	ZFY	zinc finger protein Y-linked	0	0	0	0	0	0
ENSG00000067704	IARS2	isoleucyl-tRNA synthetase 2, mitochondrial	89.62	74.49	59.98	76.36	83.01	66.15
ENSG00000067715	SYT1	synaptotagmin 1	0.97	0.79	0	1.15	1.48	0.1
ENSG00000067798	NAV3	neuron navigator 3	28.03	19.66	18.92	18.97	18.75	18.92
ENSG00000067829	IDH3G	isocitrate dehydrogenase (NAD(+)) 3 non-catalytic subunit gamma	75.96	70.19	61.86	77.65	72	75.42
ENSG00000067836	ROGDI	rogdi atypical leucine zipper	27.59	29.32	15.82	29.88	28.87	20.58
ENSG00000067840	PDZD4	PDZ domain containing 4	0.05	0.29	0	0.2	0.15	0.32
ENSG00000067842	ATP2B3	ATPase plasma membrane Ca2+ transporting 3	0	0	0	0	0	0
ENSG00000067900	ROCK1	Rho associated coiled-coil containing protein kinase 1	43.07	25.11	18.64	32.28	26.55	22.03
ENSG00000067955	CBFB	core-binding factor subunit beta	33.59	24.94	19.4	37.53	45.75	30.58
ENSG00000067992	PDK3	pyruvate dehydrogenase kinase 3	1.26	1.03	0.81	1.47	2.28	2.87
ENSG00000068001	HYAL2	hyaluronidase 2	57.46	61.75	31.49	68.15	54.75	52.39
ENSG00000068024	HDAC4	histone deacetylase 4	4.71	10.63	11.95	3.82	6.22	7.63
ENSG00000068028	RASSF1	Ras association domain family member 1	43.65	51.63	31.96	48.98	56.47	30.76
ENSG00000068078	FGFR3	fibroblast growth factor receptor 3	0.28	0.27	0.17	0.34	0.56	1.58
ENSG00000068079	IFI35	interferon induced protein 35	19.75	38.8	62.92	40.1	37.61	37.73
ENSG00000068097	HEATR6	HEAT repeat containing 6	8.56	11.43	4.33	8.54	8.11	6.9
ENSG00000068120	COASY	Coenzyme A synthase	41.7	47.76	30.14	55.47	48.33	38.03
ENSG00000068137	PLEKHH3	pleckstrin homology, MyTH4 and FERM domain containing H3	20.51	27.47	18.73	24.35	27.33	14.37
ENSG00000068305	MEF2A	myocyte enhancer factor 2A	43.98	36.33	39.94	56.95	36.7	62.25
ENSG00000068308	OTUD5	OTU deubiquitinase 5	46.69	42.78	38.8	42.52	38.08	50.49
ENSG00000068323	TFE3	transcription factor binding to IGHM enhancer 3	74.91	77.24	69.26	80.57	78.53	67.89
ENSG00000068354	TBC1D25	TBC1 domain family member 25	17.56	19.41	15.02	13.63	15.82	14.25
ENSG00000068366	ACSL4	acyl-CoA synthetase long chain family member 4	60.37	55.97	51.27	57.32	66.01	55.76
ENSG00000068383	INPP5A	inositol polyphosphate-5-phosphatase A	12.54	11.38	9.4	14.69	5.98	6.32
ENSG00000068394	GPKOW	G-patch domain and KOW motifs	18.63	20.27	17.31	20.17	20.6	19.25
ENSG00000068400	GRIPAP1	GRIP1 associated protein 1	17.27	20.73	15	31.92	22.9	15.7
ENSG00000068438	FTSJ1	FtsJ RNA 2'-O-methyltransferase 1	81.18	60.25	36.81	70.18	52.92	42.84
ENSG00000068489	PRR11	proline rich 11	27.25	16.75	2.97	18.12	26.34	8.54
ENSG00000068615	REEP1	receptor accessory protein 1	0.26	0.05	0.13	0.3	0.6	0.3
ENSG00000068650	ATP11A	ATPase phospholipid transporting 11A	7.27	9.6	7.65	10.05	7.35	4.82
ENSG00000068654	POLR1A	RNA polymerase I subunit A	7.64	8.15	7.69	13.41	6.87	8.6
ENSG00000068697	LAPTM4A	lysosomal protein transmembrane 4 alpha	460.96	492.2	736.6	383.92	440.6	513.42
ENSG00000068724	TTC7A	tetratricopeptide repeat domain 7A	22.71	19.61	18.49	25.51	22.95	20.92
ENSG00000068745	IP6K2	inositol hexakisphosphate kinase 2	100.17	93.99	71.95	130.44	103.31	89.07
ENSG00000068781	STON1-GTF2A1L	STON1-GTF2A1L readthrough	0	0	0.25	0	0.12	0
ENSG00000068784	SRBD1	S1 RNA binding domain 1	9.63	8.82	6.45	9.61	10.13	8.98
ENSG00000068796	KIF2A	kinesin family member 2A	20.37	14.16	9.7	19.27	17.74	14.1
ENSG00000068831	RASGRP2	RAS guanyl releasing protein 2	0	0	0.79	0.97	0.5	0.07
ENSG00000068878	PSME4	proteasome activator subunit 4	25.02	18.33	13.94	25.86	19	20.54
ENSG00000068885	IFT80	intraflagellar transport 80	34.14	27.08	34.6	28.87	30.48	36.5
ENSG00000068903	SIRT2	sirtuin 2	39.46	52.03	61.1	39.44	44.46	51.31
ENSG00000068912	ERLEC1	endoplasmic reticulum lectin 1	72.53	55.07	55.51	73.08	56.45	57.51
ENSG00000068971	PPP2R5B	protein phosphatase 2 regulatory subunit B'beta	18.9	15.93	12.97	21.69	17.33	10.45
ENSG00000068976	PYGM	glycogen phosphorylase, muscle associated	0.82	0.92	2.64	1.76	1.42	3.86
ENSG00000068985	PAGE1	PAGE family member 1	0	0	0	0	0	0
ENSG00000069011	PITX1	paired like homeodomain 1	2.76	2.75	1.32	124.9	94.41	40.42
ENSG00000069018	TRPC7	transient receptor potential cation channel subfamily C member 7	0	0	0	0	0	0
ENSG00000069020	MAST4	microtubule associated serine/threonine kinase family member 4	10.83	11.69	4.94	13.46	16.27	10.87
ENSG00000069122	ADGRF5	adhesion G protein-coupled receptor F5	0.03	0	0	0	0	0.03
ENSG00000069188	SDK2	sidekick cell adhesion molecule 2	0	0	0	0.12	0.11	0.01
ENSG00000069206	ADAM7	ADAM metallopeptidase domain 7	0	0	0	0	0	0
ENSG00000069248	NUP133	nucleoporin 133	13.49	15.2	13.77	20.9	14.96	13.94
ENSG00000069275	NUCKS1	nuclear casein kinase and cyclin dependent kinase substrate 1	97.39	70.85	50.7	68.92	90.49	63.89
ENSG00000069329	VPS35	VPS35 retromer complex component	78.49	69.23	63.88	63.33	65.99	77.61
ENSG00000069345	DNAJA2	DnaJ heat shock protein family (Hsp40) member A2	38.08	36.59	30.64	42.55	36.69	35.61
ENSG00000069399	BCL3	BCL3 transcription coactivator	25.65	41.03	52.27	54.53	54.93	60.24
ENSG00000069424	KCNAB2	potassium voltage-gated channel subfamily A regulatory beta subunit 2	7.01	7.39	9.17	13.01	11.35	15.55
ENSG00000069431	ABCC9	ATP binding cassette subfamily C member 9	2.25	1.43	2.89	2.98	3.25	3.9
ENSG00000069482	GAL	galanin and GMAP prepropeptide	0	0	0.99	0.31	0.33	0
ENSG00000069493	CLEC2D	C-type lectin domain family 2 member D	2.18	1.95	2.29	2.61	2.49	3.12
ENSG00000069509	FUNDC1	FUN14 domain containing 1	15.26	13.2	16.4	24.18	20.11	19.18
ENSG00000069535	MAOB	monoamine oxidase B	0.76	0.08	0.49	2.67	3.76	2.09
ENSG00000069667	RORA	RAR related orphan receptor A	8.44	3.33	8.04	6.72	6.29	5.66
ENSG00000069696	DRD4	dopamine receptor D4	0.28	0.16	0	0.14	0.14	0
ENSG00000069702	TGFBR3	transforming growth factor beta receptor 3	66.52	119.07	145.39	21.24	44.65	40.84
ENSG00000069764	PLA2G10	phospholipase A2 group X	0	0	0	0	0	0
ENSG00000069812	HES2	hes family bHLH transcription factor 2	0	0	0	0.04	0.23	0.14
ENSG00000069849	ATP1B3	ATPase Na+/K+ transporting subunit beta 3	140.3	120.74	76.95	116.5	114.05	90.3
ENSG00000069869	NEDD4	NEDD4 E3 ubiquitin protein ligase	13.22	7.81	4.97	11.01	8.59	7.54
ENSG00000069943	PIGB	phosphatidylinositol glycan anchor biosynthesis class B	18.71	13.45	14.72	13.27	15.3	13.28
ENSG00000069956	MAPK6	mitogen-activated protein kinase 6	25.86	15.83	27.75	21.53	22.09	30.65
ENSG00000069966	GNB5	G protein subunit beta 5	22.73	23.53	19.31	18.93	24.61	21.34
ENSG00000069974	RAB27A	RAB27A, member RAS oncogene family	13.2	13.06	10.44	21.41	13.66	12.25
ENSG00000069998	HDHD5	haloacid dehalogenase like hydrolase domain containing 5	11.88	20.44	14.18	25.31	19.92	17.16
ENSG00000070010	UFD1	ubiquitin recognition factor in ER associated degradation 1	104.84	87.54	59.81	116.38	58.25	50.52
ENSG00000070018	LRP6	LDL receptor related protein 6	6.92	4.87	6.04	13.99	5.07	7.46
ENSG00000070019	GUCY2C	guanylate cyclase 2C	0	0	0	0	0	0
ENSG00000070031	SCT	secretin	0	0	0	0.57	0	0
ENSG00000070047	PHRF1	PHD and ring finger domains 1	14.96	21.88	13.35	26.26	19.35	15.89
ENSG00000070061	ELP1	elongator complex protein 1	29.26	46.37	16.46	39.54	24.57	24.68
ENSG00000070081	NUCB2	nucleobindin 2	169.93	104.33	94.92	125.65	143.99	103.05
ENSG00000070087	PFN2	profilin 2	199.64	140.28	138.16	131.54	141.99	119.4
ENSG00000070159	PTPN3	protein tyrosine phosphatase non-receptor type 3	1.81	0.85	0.59	4.36	3.04	1.43
ENSG00000070182	SPTB	spectrin beta, erythrocytic	0	0	0	0.13	0.1	0
ENSG00000070190	DAPP1	dual adaptor of phosphotyrosine and 3-phosphoinositides 1	0	0	0	0	0	0
ENSG00000070193	FGF10	fibroblast growth factor 10	0.79	1.2	5.58	5.46	5.9	3.15
ENSG00000070214	SLC44A1	solute carrier family 44 member 1	40.99	43.44	71.69	17.66	32.94	50.96
ENSG00000070269	TMEM260	transmembrane protein 260	9.86	6.42	8.07	13.66	6.62	8.91
ENSG00000070366	SMG6	SMG6 nonsense mediated mRNA decay factor	13.81	25	36.29	20.72	29.41	28.41
ENSG00000070367	EXOC5	exocyst complex component 5	41.71	37.79	28.35	34.62	44.38	29.69
ENSG00000070371	CLTCL1	clathrin heavy chain like 1	3.21	3.09	2.36	5.53	3.38	4.44
ENSG00000070388	FGF22	fibroblast growth factor 22	0	0	0	0.29	0.31	0
ENSG00000070404	FSTL3	follistatin like 3	15.49	34.41	41.7	21.95	21.29	25.4
ENSG00000070413	DGCR2	DiGeorge syndrome critical region gene 2	37	38.18	38.79	37.11	33.14	38.68
ENSG00000070423	RNF126	ring finger protein 126	39.81	42.86	25.3	56.77	39.6	31.48
ENSG00000070444	MNT	MAX network transcriptional repressor	14.1	17.73	23.05	17.33	20.43	21.59
ENSG00000070476	ZXDC	ZXD family zinc finger C	7.45	9.84	6.95	10.04	9.71	7.18
ENSG00000070495	JMJD6	jumonji domain containing 6, arginine demethylase and lysine hydroxylase	17.29	22.75	12.25	29.59	15.59	16.7
ENSG00000070501	POLB	DNA polymerase beta	9.68	9.54	6.9	16.48	10.82	7.72
ENSG00000070526	ST6GALNAC1	ST6 N-acetylgalactosaminide alpha-2,6-sialyltransferase 1	0	0	0	0	0	0
ENSG00000070540	WIPI1	WD repeat domain, phosphoinositide interacting 1	70.72	63.63	120.22	49.98	31.76	85.36
ENSG00000070601	FRMPD1	FERM and PDZ domain containing 1	5.77	9.42	2.29	0.49	0.37	0.35
ENSG00000070610	GBA2	glucosylceramidase beta 2	37.69	27.72	28.21	43.76	29.64	35.56
ENSG00000070614	NDST1	N-deacetylase and N-sulfotransferase 1	48.12	49.92	47.55	55.84	55.59	46.86
ENSG00000070669	ASNS	asparagine synthetase (glutamine-hydrolyzing)	23.58	9.56	11.28	17.91	13.81	9.02
ENSG00000070718	AP3M2	adaptor related protein complex 3 subunit mu 2	7.05	9.39	6.5	9.12	9	6.48
ENSG00000070729	CNGB1	cyclic nucleotide gated channel subunit beta 1	0	0	0	0	0	0
ENSG00000070731	ST6GALNAC2	ST6 N-acetylgalactosaminide alpha-2,6-sialyltransferase 2	1.05	0.72	1.24	0.64	0.1	0
ENSG00000070748	CHAT	choline O-acetyltransferase	0	0	0	0	0	0
ENSG00000070756	PABPC1	poly(A) binding protein cytoplasmic 1	680	537.61	689.28	600.67	714.75	776.95
ENSG00000070759	TESK2	testis associated actin remodelling kinase 2	2.07	1.9	2.85	0.73	1.68	2.31
ENSG00000070761	CFAP20	cilia and flagella associated protein 20	27.72	30.58	18	35.06	30.09	20.39
ENSG00000070770	CSNK2A2	casein kinase 2 alpha 2	28.8	30.46	36.2	27	31.29	32.34
ENSG00000070778	PTPN21	protein tyrosine phosphatase non-receptor type 21	15.59	15.16	12.38	14.6	12.53	14.08
ENSG00000070785	EIF2B3	eukaryotic translation initiation factor 2B subunit gamma	37.86	38.17	19.26	30.76	33.42	23.75
ENSG00000070808	CAMK2A	calcium/calmodulin dependent protein kinase II alpha	0.57	0.36	1.26	0.61	0.81	2.87
ENSG00000070814	TCOF1	treacle ribosome biogenesis factor 1	17.14	19.79	7.74	20.33	16.82	8.51
ENSG00000070831	CDC42	cell division cycle 42	216.05	183.87	131.61	163.6	169.91	149.06
ENSG00000070882	OSBPL3	oxysterol binding protein like 3	18.77	14.11	11.78	11.66	11.31	7.95
ENSG00000070886	EPHA8	EPH receptor A8	0	0	0	0	0	0
ENSG00000070915	SLC12A3	solute carrier family 12 member 3	0	0	0	0	0	0
ENSG00000070950	RAD18	RAD18 E3 ubiquitin protein ligase	5.92	9.93	3.04	4.67	4.67	3.26
ENSG00000070961	ATP2B1	ATPase plasma membrane Ca2+ transporting 1	59.45	53.17	49.57	31.35	26.13	25.06
ENSG00000070985	TRPM5	transient receptor potential cation channel subfamily M member 5	0	0	0	0	0	0
ENSG00000071051	NCK2	NCK adaptor protein 2	13.24	15	14.88	14.13	15.13	16.57
ENSG00000071054	MAP4K4	mitogen-activated protein kinase kinase kinase kinase 4	419.07	305.79	129.22	331.71	282.28	155.19
ENSG00000071073	MGAT4A	alpha-1,3-mannosyl-glycoprotein 4-beta-N-acetylglucosaminyltransferase A	0	0	0	0	0.05	0.02
ENSG00000071082	RPL31	ribosomal protein L31	1751.5	3282.57	3763.42	2527.48	2669.82	3269.89
ENSG00000071127	WDR1	WD repeat domain 1	360.04	324.74	197.4	394.36	380.93	263.81
ENSG00000071189	SNX13	sorting nexin 13	15.6	16.93	20.47	19.16	11.78	15.72
ENSG00000071203	MS4A12	membrane spanning 4-domains A12	0	0	0	0	0	0
ENSG00000071205	ARHGAP10	Rho GTPase activating protein 10	19.24	16.21	21.28	11.63	13.42	11.13
ENSG00000071242	RPS6KA2	ribosomal protein S6 kinase A2	46.8	36.09	29.15	200.82	154.16	54.87
ENSG00000071243	ING3	inhibitor of growth family member 3	8.19	10.8	5.24	11.58	12.86	5.63
ENSG00000071246	VASH1	vasohibin 1	3.13	4.38	2.78	2.9	2.72	2.44
ENSG00000071282	LMCD1	LIM and cysteine rich domains 1	5.39	12.45	41.32	8.79	3.83	17.49
ENSG00000071462	BUD23	BUD23 rRNA methyltransferase and ribosome maturation factor	58.54	56.15	44.08	95.79	62.1	54.62
ENSG00000071537	SEL1L	SEL1L adaptor subunit of ERAD E3 ubiquitin ligase	36.27	31.21	40.24	37.79	39.18	45.56
ENSG00000071539	TRIP13	thyroid hormone receptor interactor 13	29.97	22.47	3.01	32.19	34.64	7.55
ENSG00000071553	ATP6AP1	ATPase H+ transporting accessory protein 1	108.21	106.21	116.48	122.17	95.13	109.77
ENSG00000071564	TCF3	transcription factor 3	41.73	65.76	48.99	52.52	61.25	48.48
ENSG00000071575	TRIB2	tribbles pseudokinase 2	29.4	12.56	3.65	24.86	10.72	5.65
ENSG00000071626	DAZAP1	DAZ associated protein 1	82.83	80.63	57.8	96.52	89.54	61.75
ENSG00000071655	MBD3	methyl-CpG binding domain protein 3	83.07	81.9	64.13	107.44	86.41	75.1
ENSG00000071677	PRLH	prolactin releasing hormone	0	0	0	0	0	0
ENSG00000071794	HLTF	helicase like transcription factor	25.24	18.8	12.37	17.73	24.17	15.23
ENSG00000071859	FAM50A	family with sequence similarity 50 member A	91.08	107.77	108.7	108.51	87.61	104.83
ENSG00000071889	FAM3A	FAM3 metabolism regulating signaling molecule A	32.49	38.91	48.79	44.4	40.49	38.86
ENSG00000071894	CPSF1	cleavage and polyadenylation specific factor 1	47.48	80.7	65.14	61.64	66.14	67.94
ENSG00000071909	MYO3B	myosin IIIB	0	0	0.11	0.11	0.03	0.04
ENSG00000071967	CYBRD1	cytochrome b reductase 1	213.08	195.14	381.98	126.96	162.09	302.06
ENSG00000071991	CDH19	cadherin 19	0	0	0	0	0	0
ENSG00000071994	PDCD2	programmed cell death 2	55.63	37.83	47.3	49.14	51.26	51.1
ENSG00000072041	SLC6A15	solute carrier family 6 member 15	55.09	60.22	25.7	5.48	7.29	22.83
ENSG00000072042	RDH11	retinol dehydrogenase 11	53.25	37.39	35.53	47.02	46.42	39.56
ENSG00000072062	PRKACA	protein kinase cAMP-activated catalytic subunit alpha	104.28	102.9	86.19	142.56	134.19	117.69
ENSG00000072071	ADGRL1	adhesion G protein-coupled receptor L1	5.26	7.38	5.29	8.07	3.39	4.31
ENSG00000072080	SPP2	secreted phosphoprotein 2	0	0	0	0	0	0
ENSG00000072110	ACTN1	actinin alpha 1	135.22	110.04	86.11	139.69	93.62	76.5
ENSG00000072121	ZFYVE26	zinc finger FYVE-type containing 26	8.7	8.41	9.71	6.55	6.5	7.85
ENSG00000072133	RPS6KA6	ribosomal protein S6 kinase A6	1.84	2.42	1.5	3.71	4.15	2.37
ENSG00000072134	EPN2	epsin 2	31.22	29.21	19.34	39.86	29.33	22.61
ENSG00000072135	PTPN18	protein tyrosine phosphatase non-receptor type 18	24.47	21.88	17.17	24.64	21.08	19.48
ENSG00000072163	LIMS2	LIM zinc finger domain containing 2	24.36	27.08	19.03	14.56	17.88	15.31
ENSG00000072182	ASIC4	acid sensing ion channel subunit family member 4	0.13	0	0.13	0.14	0.45	0.06
ENSG00000072195	SPEG	striated muscle enriched protein kinase	70.83	101.21	62.38	99.63	127.06	82.85
ENSG00000072201	LNX1	ligand of numb-protein X 1	0.64	1.34	2.93	9.76	19.01	5.31
ENSG00000072210	ALDH3A2	aldehyde dehydrogenase 3 family member A2	84.67	49.83	80.08	133.22	101.82	170.05
ENSG00000072274	TFRC	transferrin receptor	52.8	41.94	36.11	58.12	42.09	38.4
ENSG00000072310	SREBF1	sterol regulatory element binding transcription factor 1	17.78	43.34	65.59	34	53.6	36.07
ENSG00000072315	TRPC5	transient receptor potential cation channel subfamily C member 5	0	0	0	0.03	0	0
ENSG00000072364	AFF4	AF4/FMR2 family member 4	29.7	25.49	20.91	30.9	25.87	26.47
ENSG00000072401	UBE2D1	ubiquitin conjugating enzyme E2 D1	20.87	13.87	11.18	10.18	12.96	13.04
ENSG00000072415	MPP5	membrane palmitoylated protein 5	15.32	11.38	8.01	12.36	13.55	10.51
ENSG00000072422	RHOBTB1	Rho related BTB domain containing 1	2.8	1.15	3.06	1.82	1.47	2.82
ENSG00000072501	SMC1A	structural maintenance of chromosomes 1A	30.28	36.85	9.86	42.35	38.1	9.4
ENSG00000072506	HSD17B10	hydroxysteroid 17-beta dehydrogenase 10	45.83	68.36	40.33	88.32	68.19	44.18
ENSG00000072518	MARK2	microtubule affinity regulating kinase 2	12.93	12.72	7.94	18.28	11.53	9.74
ENSG00000072571	HMMR	hyaluronan mediated motility receptor	29.89	26.68	0.82	27.19	52.05	7.4
ENSG00000072609	CHFR	checkpoint with forkhead and ring finger domains	19.99	17.82	12.86	19.37	18.35	16.4
ENSG00000072657	TRHDE	thyrotropin releasing hormone degrading enzyme	1.9	0.53	0.03	0.46	0.74	0.03
ENSG00000072682	P4HA2	prolyl 4-hydroxylase subunit alpha 2	64.11	54.31	117.1	80.5	43.17	129.13
ENSG00000072694	FCGR2B	Fc fragment of IgG receptor IIb	0	0	0	0.13	0	0
ENSG00000072736	NFATC3	nuclear factor of activated T cells 3	7.57	6.71	4.59	6.02	5.37	5.66
ENSG00000072756	TRNT1	tRNA nucleotidyl transferase 1	20.15	12.72	12.43	17.46	17.45	12.27
ENSG00000072778	ACADVL	acyl-CoA dehydrogenase very long chain	510.78	434.57	276.53	773.44	532.7	382.26
ENSG00000072786	STK10	serine/threonine kinase 10	25.52	16.97	11.81	19.76	14.44	17.45
ENSG00000072803	FBXW11	F-box and WD repeat domain containing 11	28.03	24.81	22.47	25.5	24.61	24.64
ENSG00000072818	ACAP1	ArfGAP with coiled-coil, ankyrin repeat and PH domains 1	0.1	6.49	0.38	9.63	0.31	0.18
ENSG00000072832	CRMP1	collapsin response mediator protein 1	12.15	12.1	8.06	11.7	8.86	8.55
ENSG00000072840	EVC	EvC ciliary complex subunit 1	17.18	22.88	33.57	25.72	31.05	25.72
ENSG00000072849	DERL2	derlin 2	74.68	40.76	31.48	52.46	59.06	48.19
ENSG00000072858	SIDT1	SID1 transmembrane family member 1	0	0	0	0	0	0
ENSG00000072864	NDE1	nudE neurodevelopment protein 1	26.81	24.88	11	31.77	32.67	16.59
ENSG00000072952	IRAG1	inositol 1,4,5-triphosphate receptor associated 1	5.83	4.06	2.02	2.14	0.99	3.64
ENSG00000072954	TMEM38A	transmembrane protein 38A	0.93	1.2	0.68	1.29	0.63	0.9
ENSG00000072958	AP1M1	adaptor related protein complex 1 subunit mu 1	77.64	102.04	57.51	119.08	141.29	73.06
ENSG00000073008	PVR	PVR cell adhesion molecule	22.15	15.25	6.96	35.16	14.53	9.48
ENSG00000073050	XRCC1	X-ray repair cross complementing 1	15.52	20.34	14.3	32.5	29.09	18.28
ENSG00000073060	SCARB1	scavenger receptor class B member 1	3.97	6.58	9.09	7.73	5.22	13.61
ENSG00000073067	CYP2W1	cytochrome P450 family 2 subfamily W member 1	0	0	0	0	0	0
ENSG00000073111	MCM2	minichromosome maintenance complex component 2	22.5	30.07	3.97	36.24	44.5	9.19
ENSG00000073146	MOV10L1	Mov10 like RISC complex RNA helicase 1	0	0.05	0	0	0.09	0
ENSG00000073150	PANX2	pannexin 2	0.99	1.25	2.53	2.71	1.67	1.95
ENSG00000073169	SELENOO	selenoprotein O	20.45	24.43	22.27	27.62	24.46	26.99
ENSG00000073282	TP63	tumor protein p63	0	0	0	0.89	0.51	0.65
ENSG00000073331	ALPK1	alpha kinase 1	6	5.76	9.1	5.1	9.76	9.53
ENSG00000073350	LLGL2	LLGL scribble cell polarity complex component 2	0	0	0	0.56	0	0
ENSG00000073417	PDE8A	phosphodiesterase 8A	21.82	16.87	12.88	15.82	13.77	18.19
ENSG00000073464	CLCN4	chloride voltage-gated channel 4	2.14	4.18	2.2	4.73	2.74	4.23
ENSG00000073536	NLE1	notchless homolog 1	7.74	8.96	10.37	15.73	15.57	13.64
ENSG00000073578	SDHA	succinate dehydrogenase complex flavoprotein subunit A	66.52	84.46	66.73	88.7	88.26	81.06
ENSG00000073584	SMARCE1	SWI/SNF related, matrix associated, actin dependent regulator of chromatin, subfamily e, member 1	92.17	95.36	112.22	76.4	84	89.05
ENSG00000073598	FNDC8	fibronectin type III domain containing 8	0	0	0	0	0	0
ENSG00000073605	GSDMB	gasdermin B	8.19	3.2	2.92	4.34	4.97	1.63
ENSG00000073614	KDM5A	lysine demethylase 5A	11.05	5.61	11.97	9.13	8.34	11.29
ENSG00000073670	ADAM11	ADAM metallopeptidase domain 11	0.04	0.58	0.18	0.3	0.12	0.19
ENSG00000073711	PPP2R3A	protein phosphatase 2 regulatory subunit B''alpha	10.75	10.35	9.4	5.8	9.25	12.1
ENSG00000073712	FERMT2	fermitin family member 2	97.2	65.35	73.05	92.67	90.31	76.66
ENSG00000073734	ABCB11	ATP binding cassette subfamily B member 11	0	0	0	0.06	0	0
ENSG00000073737	DHRS9	dehydrogenase/reductase 9	1.58	0	0	2.6	2.57	0.11
ENSG00000073754	CD5L	CD5 molecule like	0	0	0	0	0	0
ENSG00000073756	PTGS2	prostaglandin-endoperoxide synthase 2	5.18	7.07	2.71	9.13	1.36	1.37
ENSG00000073792	IGF2BP2	insulin like growth factor 2 mRNA binding protein 2	23.41	29.67	27.75	20.15	10.79	12.76
ENSG00000073803	MAP3K13	mitogen-activated protein kinase kinase kinase 13	14.57	13.72	15.21	9.42	16.71	10.61
ENSG00000073849	ST6GAL1	ST6 beta-galactoside alpha-2,6-sialyltransferase 1	0.13	0.1	0.09	0.56	0.69	1.26
ENSG00000073861	TBX21	T-box transcription factor 21	0.35	0	0	0	0	0
ENSG00000073905	VDAC1P1		0	0	0.55	0	0	0
ENSG00000073910	FRY	FRY microtubule binding protein	3.47	5.34	3.11	7.23	3.13	2.36
ENSG00000073921	PICALM	phosphatidylinositol binding clathrin assembly protein	176.75	115.63	85.49	128.33	110.88	101.55
ENSG00000073969	NSF	N-ethylmaleimide sensitive factor, vesicle fusing ATPase	36.09	34.1	26.21	40.02	35.87	33.73
ENSG00000074047	GLI2	GLI family zinc finger 2	7.62	4.71	4.81	3.78	3.52	4.97
ENSG00000074054	CLASP1	cytoplasmic linker associated protein 1	16.6	15.51	15.3	11.51	16.83	16.78
ENSG00000074071	MRPS34	mitochondrial ribosomal protein S34	71.39	91.15	95.88	139.17	114.42	93.39
ENSG00000074181	NOTCH3	notch receptor 3	70.06	55.32	53.81	77.85	32.3	47.51
ENSG00000074201	CLNS1A	chloride nucleotide-sensitive channel 1A	91.66	92.09	101.28	85.98	88.52	96.19
ENSG00000074211	PPP2R2C	protein phosphatase 2 regulatory subunit Bgamma	0	0.37	0.04	0.04	0.13	0.39
ENSG00000074219	TEAD2	TEA domain transcription factor 2	11.56	11.4	18.33	13.87	5.89	13.46
ENSG00000074266	EED	embryonic ectoderm development	14	18.42	10.53	18.63	20.77	11.23
ENSG00000074276	CDHR2	cadherin related family member 2	0.73	0.17	0	0	0	0
ENSG00000074317	SNCB	synuclein beta	3.51	4.19	0	8.88	10.29	2.06
ENSG00000074319	TSG101	tumor susceptibility 101	70.93	68.93	50.19	64.86	61.38	51.91
ENSG00000074356	NCBP3	nuclear cap binding subunit 3	37	12.66	13.66	13.21	12.27	24.22
ENSG00000074370	ATP2A3	ATPase sarcoplasmic/endoplasmic reticulum Ca2+ transporting 3	0.56	1.67	0.21	4.01	1.48	1.46
ENSG00000074410	CA12	carbonic anhydrase 12	183.98	179.34	345.59	139.67	174.97	328.39
ENSG00000074416	MGLL	monoglyceride lipase	58.19	70.14	29.58	69.62	73.94	34.92
ENSG00000074527	NTN4	netrin 4	58.17	55.89	43.38	344.33	164.68	27.41
ENSG00000074582	BCS1L	BCS1 homolog, ubiquinol-cytochrome c reductase complex chaperone	36.77	29.51	27.32	51.53	42.55	40.35
ENSG00000074590	NUAK1	NUAK family kinase 1	3.24	2.58	3.4	1.37	1.78	4.38
ENSG00000074603	DPP8	dipeptidyl peptidase 8	13.14	10.36	10.59	12.29	12.94	10.88
ENSG00000074621	SLC24A1	solute carrier family 24 member 1	5.47	6.28	10.66	13.52	7.11	8.49
ENSG00000074657	ZNF532	zinc finger protein 532	24.58	20.24	35.94	27.84	28.63	35.53
ENSG00000074660	SCARF1	scavenger receptor class F member 1	0.41	0.51	0.25	0.49	0.59	0.45
ENSG00000074695	LMAN1	lectin, mannose binding 1	82.98	74.02	91.55	93.08	82.39	109.33
ENSG00000074696	HACD3	3-hydroxyacyl-CoA dehydratase 3	58.18	52.49	37.38	47.45	60.2	49.15
ENSG00000074706	IPCEF1	interaction protein for cytohesin exchange factors 1	0	0	0	0	0	0
ENSG00000074755	ZZEF1	zinc finger ZZ-type and EF-hand domain containing 1	11.25	10.59	10.19	14.91	11.48	10.44
ENSG00000074771	NOX3	NADPH oxidase 3	0	0	0	0.18	0.65	0.08
ENSG00000074800	ENO1	enolase 1	969.06	1221.72	736.1	1660.84	1828.08	1170.67
ENSG00000074803	SLC12A1	solute carrier family 12 member 1	0.02	0	0.02	0	0	0.07
ENSG00000074842	MYDGF	myeloid derived growth factor	259.81	420.48	367.05	461.4	381.1	431.26
ENSG00000074855	ANO8	anoctamin 8	10.64	18.52	8.55	15.14	14.13	10.17
ENSG00000074935	TUBE1	tubulin epsilon 1	9.08	13.74	9.3	13.18	7.58	6.59
ENSG00000074964	ARHGEF10L	Rho guanine nucleotide exchange factor 10 like	10.94	15.62	15.76	20.71	16.76	17.26
ENSG00000074966	TXK	TXK tyrosine kinase	0.18	0	0	0.17	0	0
ENSG00000075035	WSCD2	WSC domain containing 2	0.31	0	0	0	0.1	0.76
ENSG00000075043	KCNQ2	potassium voltage-gated channel subfamily Q member 2	0	0	0	0	0	0
ENSG00000075073	TACR2	tachykinin receptor 2	0.86	0.87	0.54	0.42	0.33	0.28
ENSG00000075089	ACTR6	actin related protein 6	14.32	23.62	21.27	16.74	24.78	18.23
ENSG00000075131	TIPIN	TIMELESS interacting protein	14.31	6.64	2.35	11.3	12.9	4.24
ENSG00000075142	SRI	sorcin	145.19	156.99	187	162.99	151.58	217.27
ENSG00000075151	EIF4G3	eukaryotic translation initiation factor 4 gamma 3	50.27	38.96	38.22	47.49	40.32	36.53
ENSG00000075188	NUP37	nucleoporin 37	27.26	32.11	26.51	28.47	32.63	27.08
ENSG00000075213	SEMA3A	semaphorin 3A	37.31	38.69	18.61	31.86	19.51	2.11
ENSG00000075218	GTSE1	G2 and S-phase expressed 1	19.15	25.45	2	31.84	37.64	5.02
ENSG00000075223	SEMA3C	semaphorin 3C	235.21	270.17	181.92	382.18	499.72	354.64
ENSG00000075234	TTC38	tetratricopeptide repeat domain 38	17.09	14.18	17.12	18.36	18.65	16.28
ENSG00000075239	ACAT1	acetyl-CoA acetyltransferase 1	111.32	89.86	84.25	84.33	105.92	83.16
ENSG00000075240	GRAMD4	GRAM domain containing 4	7.17	19.59	15.48	10.29	18.2	19.09
ENSG00000075275	CELSR1	cadherin EGF LAG seven-pass G-type receptor 1	2.14	3.33	1.68	4.23	10.4	4.06
ENSG00000075290	WNT8B	Wnt family member 8B	0	0	0	0	0	0
ENSG00000075292	ZNF638	zinc finger protein 638	66.81	56.32	49.84	44.43	49.7	49.55
ENSG00000075303	SLC25A40	solute carrier family 25 member 40	8.56	7.8	6.36	12.03	9.36	10.94
ENSG00000075336	TIMM21	translocase of inner mitochondrial membrane 21	37.03	22.51	16.8	29.35	27.87	15.25
ENSG00000075340	ADD2	adducin 2	0	0	0	0.4	0.6	0
ENSG00000075388	FGF4	fibroblast growth factor 4	0	0	0	0	0	0
ENSG00000075391	RASAL2	RAS protein activator like 2	11.87	12.15	6.77	11.03	10	6.98
ENSG00000075399	VPS9D1	VPS9 domain containing 1	20.7	25.31	24.02	29.49	25.37	16.13
ENSG00000075407	ZNF37A	zinc finger protein 37A	4.79	8.08	8.66	7.81	4.23	6.27
ENSG00000075413	MARK3	microtubule affinity regulating kinase 3	98.22	57.05	38.8	52.86	42.28	52.09
ENSG00000075415	SLC25A3	solute carrier family 25 member 3	745.49	836.85	880.01	923.9	847.91	1058.74
ENSG00000075420	FNDC3B	fibronectin type III domain containing 3B	39.76	41.29	52.6	45.14	39.93	47.06
ENSG00000075426	FOSL2	FOS like 2, AP-1 transcription factor subunit	41.28	54.91	83.68	59.84	79.26	95.46
ENSG00000075429	CACNG5	calcium voltage-gated channel auxiliary subunit gamma 5	0	0	0	0	0	0
ENSG00000075461	CACNG4	calcium voltage-gated channel auxiliary subunit gamma 4	0	0	0	0	0	0
ENSG00000075539	FRYL	FRY like transcription coactivator	13.51	14.76	8.19	14.89	15.01	10.61
ENSG00000075568	TMEM131	transmembrane protein 131	37.01	28.26	19.21	34.87	25.62	22.92
ENSG00000075618	FSCN1	fascin actin-bundling protein 1	162.53	195.21	171.54	241.34	203.27	176.49
ENSG00000075624	ACTB	actin beta	4251.34	3749.1	2601.29	5036.53	3866.57	3077.73
ENSG00000075643	MOCOS	molybdenum cofactor sulfurase	1.95	1.83	1.16	4.28	2.82	0.86
ENSG00000075651	PLD1	phospholipase D1	3.14	4.19	6.56	5.3	4.15	8.1
ENSG00000075673	ATP12A	ATPase H+/K+ transporting non-gastric alpha2 subunit	0	0	0	0	0.08	0
ENSG00000075702	WDR62	WD repeat domain 62	5.38	6.52	0.25	9.43	9.52	1.39
ENSG00000075711	DLG1	discs large MAGUK scaffold protein 1	27.87	17.81	16.24	40.46	29.51	19.79
ENSG00000075785	RAB7A	RAB7A, member RAS oncogene family	300.78	307.34	277.41	279.68	274.18	273.07
ENSG00000075790	BCAP29	B cell receptor associated protein 29	80.83	70.32	46.7	76.93	70.53	45.57
ENSG00000075790	BCAP29	DUS4L-BCAP29 readthrough	80.83	70.32	46.7	76.93	70.53	45.57
ENSG00000075826	SEC31B	SEC31 homolog B, COPII coat complex component	5.84	4.72	5.64	4.33	3.13	3.47
ENSG00000075856	SART3	spliceosome associated factor 3, U4/U6 recycling protein	22.73	23.05	15.19	30.45	24.79	20.79
ENSG00000075884	ARHGAP15	Rho GTPase activating protein 15	0	0	0	0	0	0
ENSG00000075886	TUBA3D	tubulin alpha 3d	0.38	0	0	0.12	0.13	0
ENSG00000075891	PAX2	paired box 2	0	0	0	0	0.05	0
ENSG00000075914	EXOSC7	exosome component 7	26.59	39.29	32.18	46.84	38.46	30.86
ENSG00000075945	KIFAP3	kinesin associated protein 3	28.51	25.03	37.78	28.69	36.08	59.63
ENSG00000075975	MKRN2	makorin ring finger protein 2	22.92	20.54	19.06	21.73	24.57	18.95
ENSG00000076003	MCM6	minichromosome maintenance complex component 6	27.91	31.89	9.02	34.99	48.92	13.76
ENSG00000076043	REXO2	RNA exonuclease 2	178.88	214.04	170.95	167.87	161.4	156.72
ENSG00000076053	RBM7	RNA binding motif protein 7	31.23	29.31	24.43	20.79	21.31	19.93
ENSG00000076067	RBMS2	RNA binding motif single stranded interacting protein 2	21.61	18.41	19.48	23.27	14.9	15.64
ENSG00000076108	BAZ2A	bromodomain adjacent to zinc finger domain 2A	27.21	21.79	20.75	28.26	22.21	18.64
ENSG00000076201	PTPN23	protein tyrosine phosphatase non-receptor type 23	29.78	36.9	31.11	36.01	33.31	31.54
ENSG00000076242	MLH1	mutL homolog 1	48.99	31.51	16.5	41.09	34.59	27.49
ENSG00000076248	UNG	uracil DNA glycosylase	29.47	28.26	23.04	29.81	33.48	29.08
ENSG00000076258	FMO4	flavin containing dimethylaniline monoxygenase 4	3.68	1.36	1.57	1.36	2.55	2.93
ENSG00000076321	KLHL20	kelch like family member 20	19.33	15.78	16.61	20.35	19.64	20.65
ENSG00000076344	RGS11	regulator of G protein signaling 11	2.15	2.74	3.25	6.04	6.96	6.9
ENSG00000076351	SLC46A1	solute carrier family 46 member 1	7.83	5.42	4.16	10.18	8.04	5.91
ENSG00000076356	PLXNA2	plexin A2	3.29	1.86	1.79	9.79	6.92	3.6
ENSG00000076382	SPAG5	sperm associated antigen 5	28.93	30.23	1.72	44.09	57.73	6.75
ENSG00000076513	ANKRD13A	ankyrin repeat domain 13A	29.09	37.12	26.61	47.98	38.32	28.92
ENSG00000076554	TPD52	tumor protein D52	0	0	0	0.62	0	0.54
ENSG00000076555	ACACB	acetyl-CoA carboxylase beta	1.65	2.39	3.25	2.13	3.37	2.85
ENSG00000076604	TRAF4	TNF receptor associated factor 4	33.65	26.91	9.27	42.31	24.53	17.16
ENSG00000076641	PAG1	phosphoprotein membrane anchor with glycosphingolipid microdomains 1	2	2.8	1.29	3.7	3.02	1.15
ENSG00000076650	GPATCH1	G-patch domain containing 1	4.42	4.02	2.8	4.9	4.17	2.69
ENSG00000076662	ICAM3	intercellular adhesion molecule 3	7.41	6.89	4.55	10.92	7.83	5.88
ENSG00000076685	NT5C2	5'-nucleotidase, cytosolic II	40.02	45.16	27.27	38.59	28.74	26.19
ENSG00000076706	MCAM	melanoma cell adhesion molecule	1.29	0.72	0.96	3.04	1.15	3.77
ENSG00000076716	GPC4	glypican 4	20.44	7.6	6.5	1.41	0.72	8.23
ENSG00000076770	MBNL3	muscleblind like splicing regulator 3	6.09	6.25	4.1	9.3	10.63	9.71
ENSG00000076826	CAMSAP3	calmodulin regulated spectrin associated protein family member 3	0	0	0	0	0	0
ENSG00000076864	RAP1GAP	RAP1 GTPase activating protein	2.26	0.15	0.22	0.44	0.16	1.29
ENSG00000076924	XAB2	XPA binding protein 2	21.22	32.54	27.71	37.46	25.88	25.17
ENSG00000076928	ARHGEF1	Rho guanine nucleotide exchange factor 1	53.6	60.8	38.65	82.21	50.7	55.52
ENSG00000076928	ARHGEF1	uncharacterized LOC100505585	53.6	60.8	38.65	82.21	50.7	55.52
ENSG00000076944	STXBP2	syntaxin binding protein 2	0.63	3.3	1.68	1.56	1.97	0.64
ENSG00000076984	MAP2K7	mitogen-activated protein kinase kinase 7	17.12	20.25	15.87	23.8	16.52	20.03
ENSG00000077009	NMRK2	nicotinamide riboside kinase 2	0	0	0	0	0	0
ENSG00000077044	DGKD	diacylglycerol kinase delta	4.77	3.81	11.05	12.32	3.36	3.05
ENSG00000077063	CTTNBP2	cortactin binding protein 2	3.73	1.56	2.51	5.65	2.56	1.36
ENSG00000077080	ACTL6B	actin like 6B	0	0	0	0	0	0
ENSG00000077092	RARB	retinoic acid receptor beta	0.48	0.06	0.46	2.4	1.16	3.61
ENSG00000077097	TOP2B	DNA topoisomerase II beta	48.29	39.22	37.49	34.25	38.96	41.76
ENSG00000077147	TM9SF3	transmembrane 9 superfamily member 3	82.59	65.83	63.85	66.55	62.19	75.06
ENSG00000077150	NFKB2	nuclear factor kappa B subunit 2	21.57	30.78	16.65	34.31	16.21	11.27
ENSG00000077152	UBE2T	ubiquitin conjugating enzyme E2 T	42.04	26.99	4.95	38.22	48.49	7.68
ENSG00000077157	PPP1R12B	protein phosphatase 1 regulatory subunit 12B	1.44	1.86	2	2.88	2.64	1.33
ENSG00000077232	DNAJC10	DnaJ heat shock protein family (Hsp40) member C10	80.09	68.68	44.06	64.3	72.37	62.73
ENSG00000077235	GTF3C1	general transcription factor IIIC subunit 1	42.83	49.58	35.73	44.43	38.17	52.6
ENSG00000077238	IL4R	interleukin 4 receptor	42.22	39.79	11.98	44.23	22.26	14.11
ENSG00000077254	USP33	ubiquitin specific peptidase 33	38.05	34.05	39.07	29.56	28.65	35.58
ENSG00000077264	PAK3	p21 (RAC1) activated kinase 3	0.24	0.1	0.04	0.36	0.66	0.2
ENSG00000077274	CAPN6	calpain 6	0	0	0	0	0	0.08
ENSG00000077279	DCX	doublecortin	0	0	0	0	0	0
ENSG00000077312	SNRPA	small nuclear ribonucleoprotein polypeptide A	99.56	100.47	69.65	76.9	93.1	78.61
ENSG00000077327	SPAG6	sperm associated antigen 6	0	0	0	0.26	0	0
ENSG00000077348	EXOSC5	exosome component 5	17.49	20.99	17.35	25.79	19.02	13.94
ENSG00000077380	DYNC1I2	dynein cytoplasmic 1 intermediate chain 2	124.42	98.3	74.26	86.36	110.54	104.33
ENSG00000077420	APBB1IP	amyloid beta precursor protein binding family B member 1 interacting protein	8.72	11.17	60.33	13.14	23.84	80.26
ENSG00000077454	LRCH4	leucine rich repeats and calponin homology domain containing 4	31.08	22.41	19.36	41.27	31.2	16.66
ENSG00000077458	FAM76B	family with sequence similarity 76 member B	9.73	8.11	9.78	15.31	6.8	7.02
ENSG00000077463	SIRT6	sirtuin 6	31.72	42.78	30.32	39.55	28.3	24.22
ENSG00000077498	TYR	tyrosinase	0	0	0	0	0	0
ENSG00000077514	POLD3	DNA polymerase delta 3, accessory subunit	16.04	12.71	3.31	12.89	15.17	5.13
ENSG00000077522	ACTN2	actinin alpha 2	0	0	0	0.18	0	0
ENSG00000077549	CAPZB	capping actin protein of muscle Z-line subunit beta	326.34	339.07	337.51	322.4	357.3	369.93
ENSG00000077585	GPR137B	G protein-coupled receptor 137B	14.45	10.88	13.01	7.83	8.34	9.69
ENSG00000077616	NAALAD2	N-acetylated alpha-linked acidic dipeptidase 2	0.58	0.75	0.55	0.49	0.38	0.72
ENSG00000077684	JADE1	jade family PHD finger 1	9.63	11.81	6.65	11.87	15.92	6.82
ENSG00000077713	SLC25A43	solute carrier family 25 member 43	43.19	35.01	39.88	31.74	34.44	34.46
ENSG00000077721	UBE2A	ubiquitin conjugating enzyme E2 A	124.73	99.83	69.13	82.87	103.94	86.38
ENSG00000077782	FGFR1	fibroblast growth factor receptor 1	111.11	115.97	91.4	200.94	151.64	91.09
ENSG00000077800	FKBP6	FKBP prolyl isomerase 6	0	0	0	0	0	0
ENSG00000077935	SMC1B	structural maintenance of chromosomes 1B	0.05	0	0	0	0	0
ENSG00000077942	FBLN1	fibulin 1	107.39	236.11	221.33	40.36	95.45	127.74
ENSG00000077943	ITGA8	integrin subunit alpha 8	0.51	0.32	0.53	0.84	0.15	0.13
ENSG00000077984	CST7	cystatin F	0	0	0	0	0	0
ENSG00000078018	MAP2	microtubule associated protein 2	0.06	0.26	0.18	0.51	0.56	0.2
ENSG00000078043	PIAS2	protein inhibitor of activated STAT 2	13.4	8.09	12.4	10.44	8.8	8.64
ENSG00000078053	AMPH	amphiphysin	5.73	6.35	5.22	0.91	2.61	4.49
ENSG00000078061	ARAF	A-Raf proto-oncogene, serine/threonine kinase	30.25	36.25	28.66	48.95	38.84	29.87
ENSG00000078070	MCCC1	methylcrotonoyl-CoA carboxylase 1	14.72	11.84	9.27	16.76	15.44	14.68
ENSG00000078081	LAMP3	lysosomal associated membrane protein 3	0	0.06	0	0	0	0
ENSG00000078098	FAP	fibroblast activation protein alpha	48.74	46.41	73.45	54.41	38.2	52.03
ENSG00000078114	NEBL	nebulette	0.15	0.03	0.05	0.15	1.3	0.41
ENSG00000078124	ACER3	alkaline ceramidase 3	17.69	10.33	8.16	6.79	8.29	12.26
ENSG00000078140	UBE2K	ubiquitin conjugating enzyme E2 K	58.85	36.18	28.41	60.17	47.05	38.47
ENSG00000078142	PIK3C3	phosphatidylinositol 3-kinase catalytic subunit type 3	25.82	19.25	21.62	34.72	19.06	27.09
ENSG00000078177	N4BP2	NEDD4 binding protein 2	1.51	1.17	1.77	1.3	1.51	1.77
ENSG00000078237	TIGAR	TP53 induced glycolysis regulatory phosphatase	4.81	10.93	0.88	7.12	8.22	5.88
ENSG00000078246	TULP3	TUB like protein 3	40.54	38.28	30.67	41.8	36.35	35.16
ENSG00000078269	SYNJ2	synaptojanin 2	29.81	28.76	23.77	61.21	37.95	37.16
ENSG00000078295	ADCY2	adenylate cyclase 2	0.05	0.03	0.9	0.05	0.48	0.27
ENSG00000078304	PPP2R5C	protein phosphatase 2 regulatory subunit B'gamma	85.28	60.6	64.11	58.42	74.99	58.79
ENSG00000078319	PMS2P1		19.89	18.44	14.56	28.21	18.75	18.89
ENSG00000078328	RBFOX1	RNA binding fox-1 homolog 1	0	0	0	0	0	0
ENSG00000078369	GNB1	G protein subunit beta 1	289.7	260.14	177.16	281.55	241.81	200.49
ENSG00000078399	HOXA9	homeobox A9	32.34	17.09	11.15	54.45	27.93	25.34
ENSG00000078401	EDN1	endothelin 1	1.62	1.66	0.27	2.87	0.82	1.09
ENSG00000078403	MLLT10	MLLT10 histone lysine methyltransferase DOT1L cofactor	19.32	16.92	11.05	16.72	12.39	14.4
ENSG00000078487	ZCWPW1	zinc finger CW-type and PWWP domain containing 1	3.8	3.68	3.92	2.42	3.6	4.81
ENSG00000078549	ADCYAP1R1	ADCYAP receptor type I	0.09	0.21	0.11	0	0.03	0.09
ENSG00000078579	FGF20	fibroblast growth factor 20	0	0	0	0	0	0
ENSG00000078589	P2RY10	P2Y receptor family member 10	0	0	0	0	0	0
ENSG00000078596	ITM2A	integral membrane protein 2A	2.83	3.08	11.35	2.27	2	2.85
ENSG00000078618	NRDC	nardilysin convertase	88.25	66.26	62.71	93.32	77.46	68.52
ENSG00000078668	VDAC3	voltage dependent anion channel 3	90.05	87.16	59.33	89.23	95.09	61.75
ENSG00000078674	PCM1	pericentriolar material 1	50.32	39.31	35.48	36.69	47.3	34.29
ENSG00000078687	TNRC6C	trinucleotide repeat containing adaptor 6C	1.74	2.93	4.61	6.25	4.23	3.21
ENSG00000078699	CBFA2T2	CBFA2/RUNX1 partner transcriptional co-repressor 2	4.75	6.38	5.66	5.91	5.46	5.26
ENSG00000078725	BRINP1	BMP/retinoic acid inducible neural specific 1	0.05	0.39	0.27	0.05	0.23	0.14
ENSG00000078747	ITCH	itchy E3 ubiquitin protein ligase	19.92	18.41	16.97	17.15	19.56	18.63
ENSG00000078795	PKD2L2	polycystin 2 like 2, transient receptor potential cation channel	0	0	0	0	0	0
ENSG00000078804	TP53INP2	tumor protein p53 inducible nuclear protein 2	10.35	12.18	13.34	19.89	13.82	19.15
ENSG00000078808	SDF4	stromal cell derived factor 4	262.51	298.49	342.11	304.21	274.87	317.12
ENSG00000078814	MYH7B	myosin heavy chain 7B	0.13	0.03	0.11	0.1	0.44	0.88
ENSG00000078898	BPIFB2	BPI fold containing family B member 2	0	0	0	0	0	0
ENSG00000078900	TP73	tumor protein p73	0.04	0	0	0	0	0.03
ENSG00000078902	TOLLIP	toll interacting protein	35.8	37.71	37.37	55.72	34.84	52.97
ENSG00000078967	UBE2D4	ubiquitin conjugating enzyme E2 D4 (putative)	10.65	10.68	11.42	19.4	15.75	12.53
ENSG00000079101	CLUL1	clusterin like 1	0	0	1.03	0	0.7	0
ENSG00000079102	RUNX1T1	RUNX1 partner transcriptional co-repressor 1	4.78	3.08	3.76	5.77	5.05	5.41
ENSG00000079112	CDH17	cadherin 17	0	0	0.86	0	0	0
ENSG00000079134	THOC1	THO complex 1	18.71	22.02	11.72	16.23	18.82	19.44
ENSG00000079150	FKBP7	FKBP prolyl isomerase 7	37.69	32.67	39.13	42.42	47.6	41.98
ENSG00000079156	OSBPL6	oxysterol binding protein like 6	2.79	2	1.46	1.85	1.96	0.92
ENSG00000079215	SLC1A3	solute carrier family 1 member 3	19.89	14.54	12.51	14.86	19.15	43.15
ENSG00000079246	XRCC5	X-ray repair cross complementing 5	165.14	118.07	80.58	140.92	144.53	94.34
ENSG00000079257	LXN	latexin	68.58	106.8	180.1	68.38	122.69	106.97
ENSG00000079263	SP140	SP140 nuclear body protein	0.41	0.63	0	0.47	0	0
ENSG00000079277	MKNK1	MAPK interacting serine/threonine kinase 1	20.79	18.9	15.5	26.56	14.37	18.89
ENSG00000079308	TNS1	tensin 1	45.95	53.93	44.93	56.82	53.5	48.07
ENSG00000079313	REXO1	RNA exonuclease 1 homolog	23.42	17.59	9.7	20.32	14.67	18.22
ENSG00000079332	SAR1A	secretion associated Ras related GTPase 1A	81.46	55.27	92.92	69.07	59.27	83.34
ENSG00000079335	CDC14A	cell division cycle 14A	2	1.48	1.07	2.59	0.95	1.01
ENSG00000079337	RAPGEF3	Rap guanine nucleotide exchange factor 3	11.03	15.05	7.12	19.95	18.56	12.89
ENSG00000079385	CEACAM1	CEA cell adhesion molecule 1	0.12	0.19	0	0.95	0	0.05
ENSG00000079387	SENP1	SUMO specific peptidase 1	7.53	6.41	4.54	7.04	8.95	5.65
ENSG00000079393	DUSP13	dual specificity phosphatase 13	0	0	0	0	0	0
ENSG00000079432	CIC	capicua transcriptional repressor	51.68	76.03	80.42	81.41	78.12	67.42
ENSG00000079435	LIPE	lipase E, hormone sensitive type	2.05	4.41	1.45	6.21	5.84	3.72
ENSG00000079459	FDFT1	farnesyl-diphosphate farnesyltransferase 1	74.98	66.34	99.17	65.31	63.32	133.05
ENSG00000079462	PAFAH1B3	platelet activating factor acetylhydrolase 1b catalytic subunit 3	17.18	40.07	19.79	41.72	35.35	24.87
ENSG00000079482	OPHN1	oligophrenin 1	2.08	3.39	4.54	4.28	1.91	2.35
ENSG00000079557	AFM	afamin	0	0	0	0	0	0
ENSG00000079616	KIF22	kinesin family member 22	42.43	46.27	7.22	64.93	63.04	23.92
ENSG00000079689	SCGN	secretagogin, EF-hand calcium binding protein	0	0	0	0	0	0
ENSG00000079691	CARMIL1	capping protein regulator and myosin 1 linker 1	9.96	12.71	11.52	4.97	6.43	6.59
ENSG00000079739	PGM1	phosphoglucomutase 1	60.74	62.57	61.71	59.3	68.64	79.23
ENSG00000079785	DDX1	DEAD-box helicase 1	91.19	73.49	63.88	94.48	78.06	76.63
ENSG00000079805	DNM2	dynamin 2	71.96	88.15	67.09	98.26	88.06	68.59
ENSG00000079819	EPB41L2	erythrocyte membrane protein band 4.1 like 2	46.56	45.49	30.8	58.15	75.4	47.8
ENSG00000079841	RIMS1	regulating synaptic membrane exocytosis 1	0.73	0.44	0.13	1.01	1.24	0.2
ENSG00000079931	MOXD1	monooxygenase DBH like 1	280.26	193.96	23.22	55.76	61.08	24.83
ENSG00000079950	STX7	syntaxin 7	46.23	40.88	31.7	29.74	34.32	29.15
ENSG00000079974	RABL2B	RAB, member of RAS oncogene family like 2B	26.9	24.88	20.87	27.03	22.16	20.45
ENSG00000079999	KEAP1	kelch like ECH associated protein 1	52.37	75.39	68.33	72.48	66.9	58.98
ENSG00000080007	DDX43	DEAD-box helicase 43	0.81	0.08	2.19	0.07	0.46	2.1
ENSG00000080031	PTPRH	protein tyrosine phosphatase receptor type H	4.74	5.18	7.48	5.78	7.6	3.64
ENSG00000080166	DCT	dopachrome tautomerase	0	0	0.03	0.12	0.12	0.09
ENSG00000080189	SLC35C2	solute carrier family 35 member C2	32.17	37.73	40.43	37.11	32.29	36.5
ENSG00000080200	CRYBG3	crystallin beta-gamma domain containing 3	4.69	5.63	4.53	5.88	6.57	3.4
ENSG00000080224	EPHA6	EPH receptor A6	0	0	0	0	0	0.34
ENSG00000080293	SCTR	secretin receptor	0	0	0.63	0	0	0.54
ENSG00000080298	RFX3	regulatory factor X3	0.98	1.18	0.74	0.99	1.24	1.06
ENSG00000080345	RIF1	replication timing regulatory factor 1	8.36	8.93	4.32	7.8	8.1	4.99
ENSG00000080371	RAB21	RAB21, member RAS oncogene family	39.97	36.01	25.22	36.03	37.17	24.9
ENSG00000080493	SLC4A4	solute carrier family 4 member 4	0.87	0.53	0.15	2.51	1.78	0.58
ENSG00000080503	SMARCA2	SWI/SNF related, matrix associated, actin dependent regulator of chromatin, subfamily a, member 2	62.08	54.35	51.85	62.18	77.01	63.9
ENSG00000080511	RDH8	retinol dehydrogenase 8	0	0	0	0.5	0	0
ENSG00000080546	SESN1	sestrin 1	13.24	13.68	20.9	8.86	14.12	18.57
ENSG00000080561	MID2	midline 2	1.32	3.99	3.36	2.3	2.66	3.56
ENSG00000080572	DNAAF6	dynein axonemal assembly factor 6	0	0	0	0	0	0
ENSG00000080573	COL5A3	collagen type V alpha 3 chain	25.03	29.73	29.17	30.4	8.61	22.25
ENSG00000080603	SRCAP	Snf2 related CREBBP activator protein	13.72	22.01	13.55	21.2	17.7	13.51
ENSG00000080608	PUM3	pumilio RNA binding family member 3	34.45	21.83	16.47	26.48	18.46	24.58
ENSG00000080618	CPB2	carboxypeptidase B2	0	0	0	0	0	0
ENSG00000080644	CHRNA3	cholinergic receptor nicotinic alpha 3 subunit	0	0.11	0.06	0	0	0.05
ENSG00000080709	KCNN2	potassium calcium-activated channel subfamily N member 2	0	0	0	0	0.33	0.12
ENSG00000080802	CNOT4	CCR4-NOT transcription complex subunit 4	13.59	8.58	9.35	11.13	9.7	8.68
ENSG00000080815	PSEN1	presenilin 1	48.56	36.38	28	31.98	40.39	26.25
ENSG00000080819	CPOX	coproporphyrinogen oxidase	20.77	22.89	14.19	22.46	22.54	19.93
ENSG00000080822	CLDND1	claudin domain containing 1	40.67	35.46	31.65	44	48.08	27.19
ENSG00000080823	MOK	MOK protein kinase	39.65	18.8	34.47	31.74	11.12	24.32
ENSG00000080824	HSP90AA1	heat shock protein 90 alpha family class A member 1	456.73	326.21	234.78	425.54	397.88	297.64
ENSG00000080839	RBL1	RB transcriptional corepressor like 1	6.79	8.76	2.09	11.36	10.5	3.04
ENSG00000080845	DLGAP4	DLG associated protein 4	101.66	108.23	101.11	121.74	94.95	88.67
ENSG00000080854	IGSF9B	immunoglobulin superfamily member 9B	1.18	4.34	1.39	2.61	7.24	2.3
ENSG00000080910	CFHR2	complement factor H related 2	0	0	0	0	0	0
ENSG00000080947	CROCCP3	CROCC pseudogene 3	1.63	3.62	1.19	3.6	1.19	1.26
ENSG00000080986	NDC80	NDC80 kinetochore complex component	21.17	18.38	1.94	27.35	30.87	6.69
ENSG00000081014	AP4E1	adaptor related protein complex 4 subunit epsilon 1	4.7	4.63	5.21	5.3	5	3.44
ENSG00000081019	RSBN1	round spermatid basic protein 1	5.67	4.7	4.42	5.91	4.13	3.99
ENSG00000081026	MAGI3	membrane associated guanylate kinase, WW and PDZ domain containing 3	5.6	4.09	4.41	3.44	5.67	4.11
ENSG00000081041	CXCL2	C-X-C motif chemokine ligand 2	1.91	4.44	3.01	8.51	3.72	1.73
ENSG00000081051	AFP	alpha fetoprotein	0	0	0	0.65	0.69	0.3
ENSG00000081052	COL4A4	collagen type IV alpha 4 chain	0.02	0	0	0.02	0.4	0
ENSG00000081059	TCF7	transcription factor 7	72.52	60.93	39.37	38.42	39.96	68.86
ENSG00000081087	OSTM1	osteoclastogenesis associated transmembrane protein 1	20.6	20.73	10.3	27.72	26.28	16.29
ENSG00000081138	CDH7	cadherin 7	0	0	0	0	0	0
ENSG00000081148	IMPG2	interphotoreceptor matrix proteoglycan 2	0.22	0.05	0.04	0.17	0.04	0.12
ENSG00000081154	PCNP	PEST proteolytic signal containing nuclear protein	124.23	80.54	83.34	71.58	86.68	97.1
ENSG00000081177	EXD2	exonuclease 3'-5' domain containing 2	7.82	10.09	9.98	10.5	10.94	11.03
ENSG00000081181	ARG2	arginase 2	1.94	3.33	1.34	2.15	4.97	3.2
ENSG00000081189	MEF2C	myocyte enhancer factor 2C	2.8	2.33	2.8	4.44	2.22	4.15
ENSG00000081237	PTPRC	protein tyrosine phosphatase receptor type C	0	0	0	0.07	0.04	0.21
ENSG00000081248	CACNA1S	calcium voltage-gated channel subunit alpha1 S	0	0	0	0	0	0
ENSG00000081277	PKP1	plakophilin 1	0.32	0.07	0	1.74	0.22	0.41
ENSG00000081307	UBA5	ubiquitin like modifier activating enzyme 5	19.33	21.82	17.99	26.77	19.59	19.37
ENSG00000081320	STK17B	serine/threonine kinase 17b	9.04	12.6	7.02	11.8	11.4	5.9
ENSG00000081377	CDC14B	cell division cycle 14B	16.48	21.06	30.28	8.08	12.8	25.68
ENSG00000081386	ZNF510	zinc finger protein 510	7.68	3.16	2.81	4.94	3.2	3.61
ENSG00000081479	LRP2	LDL receptor related protein 2	0	0	0	0	0	0
ENSG00000081665	ZNF506	zinc finger protein 506	6.57	5.41	5.48	6.31	5.07	5.06
ENSG00000081692	JMJD4	jumonji domain containing 4	10.66	8.25	9.2	16.66	12.93	10.13
ENSG00000081721	DUSP12	dual specificity phosphatase 12	20.73	25.64	19.22	28	25.67	20.34
ENSG00000081760	AACS	acetoacetyl-CoA synthetase	9.26	12.77	13.95	13.17	12.95	20.49
ENSG00000081791	DELE1	DAP3 binding cell death enhancer 1	37.79	39.77	44.65	36.48	43.51	51.07
ENSG00000081800	SLC13A1	solute carrier family 13 member 1	0	0	0	0	0	0
ENSG00000081803	CADPS2	calcium dependent secretion activator 2	6.89	7.61	10.01	5.84	7.52	6.79
ENSG00000081818	PCDHB4	protocadherin beta 4	0.05	0	0.5	0.09	0.23	0.54
ENSG00000081842	PCDHA6	protocadherin alpha 6	0.19	0.09	0.05	0.04	0.24	0.23
ENSG00000081853	PCDHGA2	protocadherin gamma subfamily A, 2	2.57	2.1	1.26	1.26	0.82	0.91
ENSG00000081870	HSPB11	heat shock protein family B (small) member 11	41.3	31	28.66	32.32	47.87	41.52
ENSG00000081913	PHLPP1	PH domain and leucine rich repeat protein phosphatase 1	2.07	4.03	2.25	4.2	6.3	1.8
ENSG00000081923	ATP8B1	ATPase phospholipid transporting 8B1	33.8	31.96	18.59	47.94	30.84	17.48
ENSG00000081985	IL12RB2	interleukin 12 receptor subunit beta 2	0.03	0	0.16	0	0	0.11
ENSG00000082014	SMARCD3	SWI/SNF related, matrix associated, actin dependent regulator of chromatin, subfamily d, member 3	24.06	17.02	22.8	36.09	20.15	24.84
ENSG00000082068	WDR70	WD repeat domain 70	16.86	21.81	18.07	20.31	19.84	19.75
ENSG00000082074	FYB1	FYN binding protein 1	0.37	1.06	1.92	0.39	0.11	0.68
ENSG00000082126	MPP4	membrane palmitoylated protein 4	7.52	6.68	1.28	6.51	5.51	0.84
ENSG00000082146	STRADB	STE20 related adaptor beta	27.09	32.41	23.2	33.8	34.14	19.52
ENSG00000082153	BZW1	basic leucine zipper and W2 domains 1	389.95	358.46	108.51	397.34	424.07	128.39
ENSG00000082175	PGR	progesterone receptor	0.54	0.32	0.5	0.25	1.59	0.45
ENSG00000082196	C1QTNF3	C1q and TNF related 3	3.25	2.31	3.51	1.36	2.31	5.29
ENSG00000082212	ME2	malic enzyme 2	26.84	25.79	11.39	29.04	27.36	13.74
ENSG00000082213	C5orf22	chromosome 5 open reading frame 22	11.23	7.54	8.02	12.13	7.93	6.7
ENSG00000082258	CCNT2	cyclin T2	9.71	14.27	7.45	11.61	8.51	7.01
ENSG00000082269	FAM135A	family with sequence similarity 135 member A	4.63	4.34	3.54	2.54	3.31	2.31
ENSG00000082293	COL19A1	collagen type XIX alpha 1 chain	0.52	0.07	0.15	0	0	0.02
ENSG00000082397	EPB41L3	erythrocyte membrane protein band 4.1 like 3	83.46	92.77	79.86	33.16	45.76	73.43
ENSG00000082438	COBLL1	cordon-bleu WH2 repeat protein like 1	2.98	1.93	4.32	3.25	6.46	3.38
ENSG00000082458	DLG3	discs large MAGUK scaffold protein 3	6.85	6.8	3.85	4.25	5.43	4.62
ENSG00000082482	KCNK2	potassium two pore domain channel subfamily K member 2	67.85	43.57	7.23	35.65	27.44	3.74
ENSG00000082497	SERTAD4	SERTA domain containing 4	5.16	1.88	4.7	1.45	0.62	2.47
ENSG00000082512	TRAF5	TNF receptor associated factor 5	5.69	3.72	4.01	3.37	3.66	4
ENSG00000082515	MRPL22	mitochondrial ribosomal protein L22	43.87	27.13	35.49	39.76	32.48	25.8
ENSG00000082516	GEMIN5	gem nuclear organelle associated protein 5	8.31	8.19	4.76	8.63	7.55	6.53
ENSG00000082556	OPRK1	opioid receptor kappa 1	0	0	0	0	0	0
ENSG00000082641	NFE2L1	nuclear factor, erythroid 2 like 1	184.22	202.69	216.21	254.79	236.41	327.58
ENSG00000082684	SEMA5B	semaphorin 5B	0.12	0	0	0.04	0	0.1
ENSG00000082701	GSK3B	glycogen synthase kinase 3 beta	21.81	18.24	17.04	24.21	22.6	16.74
ENSG00000082781	ITGB5	integrin subunit beta 5	207	288.29	239.07	300.06	312.36	261.52
ENSG00000082805	ERC1	ELKS/RAB6-interacting/CAST family member 1	20.59	21.31	14.43	23.42	18.81	15.32
ENSG00000082898	XPO1	exportin 1	96.2	80.5	47.52	86.45	95.82	62.22
ENSG00000082929	LINC01587	long intergenic non-protein coding RNA 1587	0.6	0	0.62	0	0	0
ENSG00000082996	RNF13	ring finger protein 13	28.21	24.5	38.67	17.24	21.81	26.53
ENSG00000083067	TRPM3	transient receptor potential cation channel subfamily M member 3	0.6	0.53	0.1	0.61	0.8	0.09
ENSG00000083093	PALB2	partner and localizer of BRCA2	9.45	4.95	5.07	9.77	7.06	5.67
ENSG00000083097	DOP1A	DOP1 leucine zipper like protein A	5.12	6.47	7.68	8.16	5.73	5.94
ENSG00000083099	LYRM2	LYR motif containing 2	30.49	29.97	22.56	26.24	30.29	31.26
ENSG00000083123	BCKDHB	branched chain keto acid dehydrogenase E1 subunit beta	6.75	9.03	9.58	12.27	11.3	14.62
ENSG00000083168	KAT6A	lysine acetyltransferase 6A	9.26	10.53	8.4	9.77	9.67	8.32
ENSG00000083223	TUT7	terminal uridylyl transferase 7	13.09	11.18	8.3	11.68	12.79	12.45
ENSG00000083290	ULK2	unc-51 like autophagy activating kinase 2	7.59	8.64	12.71	7.47	6.9	12.36
ENSG00000083307	GRHL2	grainyhead like transcription factor 2	0	0	0	0	0	0
ENSG00000083312	TNPO1	transportin 1	79.18	67.93	43.47	75.98	67.39	41.18
ENSG00000083444	PLOD1	procollagen-lysine,2-oxoglutarate 5-dioxygenase 1	133.95	164.81	160.56	182.32	167.78	181.12
ENSG00000083454	P2RX5	purinergic receptor P2X 5	1.14	0	0.72	3.63	0.97	0.42
ENSG00000083457	ITGAE	integrin subunit alpha E	29.65	31.43	25.44	45.62	37.21	31.31
ENSG00000083520	DIS3	DIS3 homolog, exosome endoribonuclease and 3'-5' exoribonuclease	23.29	15.44	14.06	18	19.72	15.78
ENSG00000083535	PIBF1	progesterone immunomodulatory binding factor 1	12.02	9.73	7.32	8.24	9.74	7.44
ENSG00000083544	TDRD3	tudor domain containing 3	10.21	6.2	8.47	8.35	6.98	8.53
ENSG00000083622	AC000061.1		0	0	0	0	0	0
ENSG00000083635	NUFIP1	nuclear FMR1 interacting protein 1	5.12	4.06	3.03	3.45	4.19	3.89
ENSG00000083642	PDS5B	PDS5 cohesin associated factor B	18.85	10.45	6.26	10.11	13.3	8.17
ENSG00000083720	OXCT1	3-oxoacid CoA-transferase 1	33.39	29.98	27.45	32.4	41.09	34.31
ENSG00000083750	RRAGB	Ras related GTP binding B	14.29	8.85	17.19	7.4	10.81	17.58
ENSG00000083782	EPYC	epiphycan	0	0	0	0	0	0
ENSG00000083799	CYLD	CYLD lysine 63 deubiquitinase	33.93	23.64	15.85	30.64	21.03	21.1
ENSG00000083807	SLC27A5	solute carrier family 27 member 5	2.65	9.25	3.62	4.18	5.32	5.11
ENSG00000083812	ZNF324	zinc finger protein 324	4.41	4.05	4.87	5.46	5.17	7
ENSG00000083814	ZNF671	zinc finger protein 671	3.09	3.08	3.21	4.2	2.4	2.42
ENSG00000083817	ZNF416	zinc finger protein 416	2.66	2.34	3.08	2.03	3.09	3.92
ENSG00000083828	ZNF586	zinc finger protein 586	2.65	3.98	6.3	2.8	3.32	4.81
ENSG00000083838	ZNF446	zinc finger protein 446	12.6	11.12	14.23	8.51	8.36	10.49
ENSG00000083844	ZNF264	zinc finger protein 264	5.44	4.12	5.5	6.55	2.65	2.3
ENSG00000083845	RPS5	ribosomal protein S5	894.82	976.15	995.62	897.92	837.63	997.84
ENSG00000083857	FAT1	FAT atypical cadherin 1	182.87	145.25	126.12	150.59	104.5	161.75
ENSG00000083896	YTHDC1	YTH domain containing 1	29.1	27.83	23.7	32.43	25.18	24.53
ENSG00000083937	CHMP2B	charged multivesicular body protein 2B	29.93	25.84	23.06	19.81	25.08	22.45
ENSG00000084070	SMAP2	small ArfGAP2	53.84	58.85	31.22	37.92	36.54	35.89
ENSG00000084072	PPIE	peptidylprolyl isomerase E	36.23	36.77	35.87	42.52	38.45	32.53
ENSG00000084073	ZMPSTE24	zinc metallopeptidase STE24	63.83	43.59	40.79	47.34	46.58	44.24
ENSG00000084090	STARD7	StAR related lipid transfer domain containing 7	55.5	56.78	37.74	77.06	60.11	45.82
ENSG00000084092	NOA1	nitric oxide associated 1	17.64	20.49	30.51	19.78	15.11	25.06
ENSG00000084093	REST	RE1 silencing transcription factor	8.74	8.25	7.39	7.61	9.55	8.2
ENSG00000084110	HAL	histidine ammonia-lyase	0.08	0	0	0	0.33	0
ENSG00000084112	SSH1	slingshot protein phosphatase 1	18.12	19.74	16.51	23.82	15.78	14.82
ENSG00000084207	GSTP1	glutathione S-transferase pi 1	466.58	497.57	563.37	571.9	492.96	520.93
ENSG00000084234	APLP2	amyloid beta precursor like protein 2	929.18	1048.86	603.1	985.84	1015.71	604.65
ENSG00000084444	FAM234B	family with sequence similarity 234 member B	3.79	3.64	2.69	3.88	5.33	3.42
ENSG00000084453	SLCO1A2	solute carrier organic anion transporter family member 1A2	0	0	0	0	0	0
ENSG00000084463	WBP11	WW domain binding protein 11	19.64	20.04	11.92	25.19	25.1	15.32
ENSG00000084623	EIF3I	eukaryotic translation initiation factor 3 subunit I	229.25	204.11	189.89	200.82	205.19	213.71
ENSG00000084628	NKAIN1	sodium/potassium transporting ATPase interacting 1	0.47	0	0.86	0.12	0.51	0.21
ENSG00000084636	COL16A1	collagen type XVI alpha 1 chain	95.42	86.07	122.02	100.56	50.54	85.02
ENSG00000084652	TXLNA	taxilin alpha	42.67	48.48	45.53	53.91	53.96	48.65
ENSG00000084674	APOB	apolipoprotein B	0	0	0.03	0	0.05	0.03
ENSG00000084676	NCOA1	nuclear receptor coactivator 1	7.08	7.73	8.74	7.68	7.97	10.79
ENSG00000084693	AGBL5	ATP/GTP binding protein like 5	21.12	17.92	17.72	16.22	24.79	20.24
ENSG00000084710	EFR3B	EFR3 homolog B	1.35	0.82	1.35	1.52	1.38	1.34
ENSG00000084731	KIF3C	kinesin family member 3C	16.26	13.97	9.66	22.27	14.28	17.06
ENSG00000084733	RAB10	RAB10, member RAS oncogene family	143.08	80.37	87.28	89.9	84.75	82.27
ENSG00000084734	GCKR	glucokinase regulator	1.84	1.47	0.37	0.4	0.9	0.51
ENSG00000084754	HADHA	hydroxyacyl-CoA dehydrogenase trifunctional multienzyme complex subunit alpha	132.22	124.96	122.18	122.82	140.37	155.38
ENSG00000084764	MAPRE3	microtubule associated protein RP/EB family member 3	19.69	16.29	17.99	29.98	22.86	27.41
ENSG00000084774	CAD	carbamoyl-phosphate synthetase 2, aspartate transcarbamylase, and dihydroorotase	37.17	29.04	18.66	43.91	31.61	21.3
ENSG00000085063	CD59	CD59 molecule (CD59 blood group)	1553.23	1683.64	1506.68	1498.32	1429.29	1123.66
ENSG00000085117	CD82	CD82 molecule	21.24	19.54	27.11	51.91	42.17	33.81
ENSG00000085185	BCORL1	BCL6 corepressor like 1	7.98	11.33	7.57	6.88	4.69	5.66
ENSG00000085224	ATRX	ATRX chromatin remodeler	32.34	21.47	27.99	25.55	26.23	25.93
ENSG00000085231	AK6	adenylate kinase 6	63.13	51.04	30.47	52.73	57.31	35.14
ENSG00000085265	FCN1	ficolin 1	0	0	0	0	0	0
ENSG00000085274	MYNN	myoneurin	7.28	7.06	9.01	6.96	7.32	9.56
ENSG00000085276	MECOM	MDS1 and EVI1 complex locus	0.92	1.29	0.23	2.93	4.82	4.36
ENSG00000085365	SCAMP1	secretory carrier membrane protein 1	34.3	34.13	35.8	29.93	31.21	35.52
ENSG00000085377	PREP	prolyl endopeptidase	17.69	18.2	11.86	19.98	18.15	18.67
ENSG00000085382	HACE1	HECT domain and ankyrin repeat containing E3 ubiquitin protein ligase 1	4.42	5.76	4.37	6.76	6.39	3.55
ENSG00000085415	SEH1L	SEH1 like nucleoporin	25.35	23.92	14.06	21.93	32.12	14.46
ENSG00000085433	WDR47	WD repeat domain 47	10.47	9.93	5.3	11.46	8.42	6.84
ENSG00000085449	WDFY1	WD repeat and FYVE domain containing 1	51.97	42.07	33.6	33.58	39.06	28.25
ENSG00000085465	OVGP1	oviductal glycoprotein 1	1.66	0.57	0.33	1.16	0.83	0.36
ENSG00000085491	SLC25A24	solute carrier family 25 member 24	33.13	24.91	20.82	23.16	22.76	20.78
ENSG00000085511	MAP3K4	mitogen-activated protein kinase kinase kinase 4	13.57	11.32	7.38	34.08	9.13	10.69
ENSG00000085514	PILRA	paired immunoglobin like type 2 receptor alpha	1.21	0.49	2.29	0.38	0	0.37
ENSG00000085552	IGSF9	immunoglobulin superfamily member 9	0.27	0	0.07	0.12	0.19	0.06
ENSG00000085563	ABCB1	ATP binding cassette subfamily B member 1	0	0.04	0	0	0	0
ENSG00000085644	ZNF213	zinc finger protein 213	7.79	9.29	7.64	9.37	7.55	7.97
ENSG00000085662	AKR1B1	aldo-keto reductase family 1 member B	284.04	228.45	353.11	270.5	213.38	452.09
ENSG00000085719	CPNE3	copine 3	45.68	44.34	40.5	45.75	54.41	43.63
ENSG00000085721	RRN3	RRN3 homolog, RNA polymerase I transcription factor	20.96	19.88	14.72	23.73	21.12	13.57
ENSG00000085733	CTTN	cortactin	242.93	248.59	235.39	280.71	229.92	244.16
ENSG00000085741	WNT11	Wnt family member 11	9.95	10.12	30.04	3.38	19.1	62.32
ENSG00000085760	MTIF2	mitochondrial translational initiation factor 2	22.03	18.66	15.71	18.51	18.34	19.43
ENSG00000085788	DDHD2	DDHD domain containing 2	28.96	21.21	22.26	25.09	20.71	18.95
ENSG00000085831	TTC39A	tetratricopeptide repeat domain 39A	1.1	2.32	2.48	1.69	0.45	1.38
ENSG00000085832	EPS15	epidermal growth factor receptor pathway substrate 15	24.96	23.08	21.75	19.15	26.48	25.5
ENSG00000085840	ORC1	origin recognition complex subunit 1	4.59	4.4	0.06	5.47	6.29	1.17
ENSG00000085871	MGST2	microsomal glutathione S-transferase 2	4.63	3.67	6.05	2.87	5.01	8.8
ENSG00000085872	CHERP	calcium homeostasis endoplasmic reticulum protein	18.16	19.74	16.29	34.3	20.93	17.49
ENSG00000085978	ATG16L1	autophagy related 16 like 1	15.29	13.73	8.35	17.39	17.86	13.05
ENSG00000085982	USP40	ubiquitin specific peptidase 40	20.48	16.35	14.61	30.83	21.46	16.74
ENSG00000085998	POMGNT1	protein O-linked mannose N-acetylglucosaminyltransferase 1 (beta 1,2-)	75.82	65.88	37.47	98.15	62.39	47.43
ENSG00000085999	RAD54L	RAD54 like	10.19	8.38	0.36	8.48	14.09	2.22
ENSG00000086015	MAST2	microtubule associated serine/threonine kinase 2	35.38	25.7	18.71	46.08	24.89	20.88
ENSG00000086061	DNAJA1	DnaJ heat shock protein family (Hsp40) member A1	123.97	102.09	70.14	114.25	109.38	86.42
ENSG00000086062	B4GALT1	beta-1,4-galactosyltransferase 1	93.77	76.8	98.4	102.04	87.9	116.48
ENSG00000086065	CHMP5	charged multivesicular body protein 5	55.48	46.83	39.51	45.38	48.14	46.81
ENSG00000086102	NFX1	nuclear transcription factor, X-box binding 1	18.74	15.66	17.65	20.05	19.58	18.31
ENSG00000086159	AQP6	aquaporin 6	0	0.19	0.08	0.23	0.07	0.07
ENSG00000086189	DIMT1	DIMT1 rRNA methyltransferase and ribosome maturation factor	33.77	33.92	26.9	40.45	26.94	28.22
ENSG00000086200	IPO11	importin 11	18.5	15.32	7.93	12.3	17.61	11.79
ENSG00000086205	FOLH1	folate hydrolase 1	0	0	0.07	0	0	0.28
ENSG00000086232	EIF2AK1	eukaryotic translation initiation factor 2 alpha kinase 1	41.24	40.72	33.57	50.07	43.11	42.24
ENSG00000086288	NME8	NME/NM23 family member 8	0	0	0	0	0	0
ENSG00000086289	EPDR1	ependymin related 1	79.73	86.19	69.81	54.09	73.88	50.67
ENSG00000086300	SNX10	sorting nexin 10	0.53	0.26	5.07	0.69	2.47	10.18
ENSG00000086475	SEPHS1	selenophosphate synthetase 1	37.24	27.75	26.3	34.75	30.66	34.1
ENSG00000086504	MRPL28	mitochondrial ribosomal protein L28	69.23	74.81	64.19	104.17	83.87	70.2
ENSG00000086506	HBQ1	hemoglobin subunit theta 1	0	0	0	0	0	0
ENSG00000086544	ITPKC	inositol-trisphosphate 3-kinase C	6.06	9.75	8.99	7.93	9.33	7.65
ENSG00000086548	CEACAM6	CEA cell adhesion molecule 6	0	0	0	0	0	0
ENSG00000086570	FAT2	FAT atypical cadherin 2	0.12	0.01	0.26	0.16	0.25	0.86
ENSG00000086589	RBM22	RNA binding motif protein 22	36.59	36.33	22.53	34.3	33.18	21.36
ENSG00000086598	TMED2	transmembrane p24 trafficking protein 2	186.82	137.14	123.9	184.44	148.49	141.46
ENSG00000086619	ERO1B	endoplasmic reticulum oxidoreductase 1 beta	1.76	1.83	2.87	0.69	1.76	2.44
ENSG00000086666	ZFAND6	zinc finger AN1-type containing 6	79.5	83.51	53.36	71.36	79.44	69.48
ENSG00000086696	HSD17B2	hydroxysteroid 17-beta dehydrogenase 2	0	0	0	0	0	0
ENSG00000086712	TXLNG	taxilin gamma	8.95	7.25	6.36	9.75	7.33	7.02
ENSG00000086717	PPEF1	protein phosphatase with EF-hand domain 1	0.13	0.36	1.11	1	2.34	2.28
ENSG00000086730	LAT2	linker for activation of T cells family member 2	1.18	0.26	0.34	1.24	1.58	1.01
ENSG00000086758	HUWE1	HECT, UBA and WWE domain containing E3 ubiquitin protein ligase 1	64.87	63.52	57.25	82.14	62.77	69.7
ENSG00000086827	ZW10	zw10 kinetochore protein	14.17	10.71	6.92	11.2	13.63	8.59
ENSG00000086848	ALG9	ALG9 alpha-1,2-mannosyltransferase	19.15	14.38	13.89	25.08	16.07	14.59
ENSG00000086967	MYBPC2	myosin binding protein C2	0	0	0	0	0	0
ENSG00000086991	NOX4	NADPH oxidase 4	1.35	0	0.35	0.1	0	0.46
ENSG00000087008	ACOX3	acyl-CoA oxidase 3, pristanoyl	15.04	13.24	14.03	20.46	13.81	17.07
ENSG00000087053	MTMR2	myotubularin related protein 2	25.44	17.2	15.15	20.52	22.19	20.43
ENSG00000087074	PPP1R15A	protein phosphatase 1 regulatory subunit 15A	53.18	74.42	75.39	61.89	60.12	71.43
ENSG00000087076	HSD17B14	hydroxysteroid 17-beta dehydrogenase 14	9.32	8.07	28.11	1.19	0.66	16.61
ENSG00000087077	TRIP6	thyroid hormone receptor interactor 6	80.32	144.76	128.89	228.6	177.07	161.14
ENSG00000087085	ACHE	acetylcholinesterase (Cartwright blood group)	0.1	0.19	0.44	0.17	0.23	0.17
ENSG00000087086	FTL	ferritin light chain	5684.18	4925.26	13279.1	3143.81	3309.92	8281.37
ENSG00000087087	SRRT	serrate, RNA effector molecule	91.38	76.24	47.53	126.4	80.41	58.14
ENSG00000087088	BAX	BCL2 associated X, apoptosis regulator	171.23	275.84	228.6	228.99	205.12	229.63
ENSG00000087095	NLK	nemo like kinase	6.7	5.7	4.2	6.88	8.66	3.57
ENSG00000087111	PIGS	phosphatidylinositol glycan anchor biosynthesis class S	38.19	23.39	35.36	38.58	28.49	46.88
ENSG00000087116	ADAMTS2	ADAM metallopeptidase with thrombospondin type 1 motif 2	68.58	61.43	100.43	60.41	45.58	98.43
ENSG00000087128	TMPRSS11E	transmembrane serine protease 11E	0	0	0	0	0	0.26
ENSG00000087152	ATXN7L3	ataxin 7 like 3	38.33	45.61	42.06	52.75	46.69	37.43
ENSG00000087157	PGS1	phosphatidylglycerophosphate synthase 1	23.63	27.2	23.09	28.96	23.09	16.68
ENSG00000087191	PSMC5	proteasome 26S subunit, ATPase 5	161.02	200.18	124.91	196.26	206.89	147.84
ENSG00000087206	UIMC1	ubiquitin interaction motif containing 1	19.89	17.6	9.85	15.47	16.31	12.4
ENSG00000087237	CETP	cholesteryl ester transfer protein	0.21	0.61	0.21	0	0.21	0.11
ENSG00000087245	MMP2	matrix metallopeptidase 2	1219.72	1084.29	2372.46	673.23	905.98	1916.19
ENSG00000087250	MT3	metallothionein 3	0	0	0	0	4.51	0
ENSG00000087253	LPCAT2	lysophosphatidylcholine acyltransferase 2	13.87	15.31	10.13	12.83	12.92	13.21
ENSG00000087258	GNAO1	G protein subunit alpha o1	0	0.04	0.1	0.3	0.5	0.39
ENSG00000087263	OGFOD1	2-oxoglutarate and iron dependent oxygenase domain containing 1	34.37	39.11	22.48	64.03	37.58	24.64
ENSG00000087266	SH3BP2	SH3 domain binding protein 2	16.77	26.24	12.19	21.43	11.08	8.48
ENSG00000087269	NOP14	NOP14 nucleolar protein	23.41	19.28	16.16	24.42	18.08	17.69
ENSG00000087274	ADD1	adducin 1	210.68	253.44	191.64	202.28	210.9	204.39
ENSG00000087299	L2HGDH	L-2-hydroxyglutarate dehydrogenase	1.26	1.96	1.12	3.91	3.72	1.1
ENSG00000087301	TXNDC16	thioredoxin domain containing 16	3.39	2.44	2.27	1.44	3.29	3.78
ENSG00000087302	RTRAF	RNA transcription, translation and transport factor	149.32	103.31	93.18	103.3	89.78	85.5
ENSG00000087303	NID2	nidogen 2	61.89	44.52	64.36	111.69	23	45.1
ENSG00000087338	GMCL1	germ cell-less 1, spermatogenesis associated	6.77	11.48	9.03	6.06	8.64	6.39
ENSG00000087365	SF3B2	splicing factor 3b subunit 2	136.69	114.13	108.65	139.47	134.78	125.88
ENSG00000087448	KLHL42	kelch like family member 42	16.52	17.21	10.45	13.28	10.83	8.08
ENSG00000087460	GNAS	GNAS complex locus	866.47	826.13	805.46	758.2	752.38	846.26
ENSG00000087470	DNM1L	dynamin 1 like	60.01	45.14	31.21	50.68	39.94	36.79
ENSG00000087494	PTHLH	parathyroid hormone like hormone	66.74	76.4	19.18	8.19	11.53	8.59
ENSG00000087495	PHACTR3	phosphatase and actin regulator 3	0	0	0	0	0	0
ENSG00000087502	ERGIC2	ERGIC and golgi 2	76.33	44.77	34.01	59.32	35.59	48.49
ENSG00000087510	TFAP2C	transcription factor AP-2 gamma	0	0	0	0	0	0
ENSG00000087586	AURKA	aurora kinase A	31.42	30.67	3.14	41.62	47.52	12.46
ENSG00000087589	CASS4	Cas scaffold protein family member 4	0.44	0.43	0	0	0	0.05
ENSG00000087842	PIR	pirin	11.09	9.3	29.09	13.09	12.92	25.71
ENSG00000087884	AAMDC	adipogenesis associated Mth938 domain containing	54.43	76.23	66.96	61.78	58.19	60.55
ENSG00000087903	RFX2	regulatory factor X2	6.27	9.64	9.03	14.46	13.21	7.55
ENSG00000087995	METTL2A	methyltransferase like 2A	9.93	9.6	6.32	14.27	9.67	5.27
ENSG00000088002	SULT2B1	sulfotransferase family 2B member 1	0.17	0	0.69	0	0.72	0.15
ENSG00000088035	ALG6	ALG6 alpha-1,3-glucosyltransferase	8.56	9.6	5.85	4.95	6.47	6.75
ENSG00000088038	CNOT3	CCR4-NOT transcription complex subunit 3	28.09	33.09	25.83	33.39	43.87	35.21
ENSG00000088053	GP6	glycoprotein VI platelet	0	0	0	0	0	0.07
ENSG00000088179	PTPN4	protein tyrosine phosphatase non-receptor type 4	12.22	2.51	2.43	5.82	4.02	4.06
ENSG00000088205	DDX18	DEAD-box helicase 18	25.65	14.97	16.76	25.44	22.61	17.3
ENSG00000088247	KHSRP	KH-type splicing regulatory protein	134.19	206.74	142.36	232.51	212.17	152.06
ENSG00000088256	GNA11	G protein subunit alpha 11	50.5	55.66	45.16	57.32	52.16	43.83
ENSG00000088280	ASAP3	ArfGAP with SH3 domain, ankyrin repeat and PH domain 3	39.18	43.31	58.47	32	42.94	52.25
ENSG00000088298	EDEM2	ER degradation enhancing alpha-mannosidase like protein 2	22.84	19.46	28.9	24.4	25.49	28.62
ENSG00000088298	EDEM2	MMP24-AS1-EDEM2 readthrough	22.84	19.46	28.9	24.4	25.49	28.62
ENSG00000088305	DNMT3B	DNA methyltransferase 3 beta	1.2	2.04	1.69	1.36	1.1	0.89
ENSG00000088320	REM1	RRAD and GEM like GTPase 1	5.71	1.58	3.78	1.87	1.95	3.06
ENSG00000088325	TPX2	TPX2 microtubule nucleation factor	56.32	47.37	5.34	58.76	81.92	19.11
ENSG00000088340	FER1L4		0.68	2.57	2.22	2.51	0.3	3.11
ENSG00000088356	PDRG1	p53 and DNA damage regulated 1	6.5	10.41	7.74	11.36	12.79	9.59
ENSG00000088367	EPB41L1	erythrocyte membrane protein band 4.1 like 1	25.29	22.59	48.92	59.55	97.64	66.87
ENSG00000088386	SLC15A1	solute carrier family 15 member 1	0	0	0	0	0.06	0
ENSG00000088387	DOCK9	dedicator of cytokinesis 9	11.75	8.16	6.79	20.25	26.24	23.41
ENSG00000088448	ANKRD10	ankyrin repeat domain 10	31.41	43.35	34.7	36.3	27.54	32.9
ENSG00000088451	TGDS	TDP-glucose 4,6-dehydratase	8.27	5.41	4.07	8.49	6.21	5.65
ENSG00000088538	DOCK3	dedicator of cytokinesis 3	0.93	0.25	0.11	1	1.57	0.72
ENSG00000088543	C3orf18	chromosome 3 open reading frame 18	28.3	30.65	28.55	27.99	32.83	37.37
ENSG00000088682	COQ9	coenzyme Q9	33.75	38.04	25.7	38.16	40.03	28.97
ENSG00000088726	TMEM40	transmembrane protein 40	0	0	0	0	0	0.19
ENSG00000088727	KIF9	kinesin family member 9	6.86	5.55	4.87	6.82	5.58	5.22
ENSG00000088756	ARHGAP28	Rho GTPase activating protein 28	2.28	2.58	10.07	0.96	3.55	3.78
ENSG00000088766	CRLS1	cardiolipin synthase 1	32.76	19.67	25.04	24.27	21.97	26.38
ENSG00000088782	DEFB127	defensin beta 127	0	0	0	0	0	0
ENSG00000088808	PPP1R13B	protein phosphatase 1 regulatory subunit 13B	1.31	0.57	3.42	1.71	2.08	2.43
ENSG00000088812	ATRN	attractin	19.94	19.52	20.97	17.29	17.19	19.51
ENSG00000088826	SMOX	spermine oxidase	8.69	11.95	12.5	11.09	8.25	13.52
ENSG00000088827	SIGLEC1	sialic acid binding Ig like lectin 1	0	0	0.04	0.24	0.02	0
ENSG00000088832	FKBP1A	FKBP prolyl isomerase 1A	1301.24	630.78	587.2	717.8	656.93	788.08
ENSG00000088833	NSFL1C	NSFL1 cofactor	46.59	63.06	36.78	73.22	52	59.4
ENSG00000088836	SLC4A11	solute carrier family 4 member 11	1.27	1.18	0.73	1.57	1.1	0.36
ENSG00000088854	C20orf194	chromosome 20 open reading frame 194	7.71	7.86	6.14	5.52	6.7	5.89
ENSG00000088876	ZNF343	zinc finger protein 343	4.35	4.99	5.19	6.61	3.26	4.36
ENSG00000088881	EBF4	EBF family member 4	0.12	0.66	3.81	0.26	0.12	0.3
ENSG00000088882	CPXM1	carboxypeptidase X, M14 family member 1	9.22	7.92	40.56	2.55	1.97	6.32
ENSG00000088888	MAVS	mitochondrial antiviral signaling protein	35.74	37.55	23.77	41.3	46.93	33.37
ENSG00000088899	LZTS3	leucine zipper tumor suppressor family member 3	3.23	3.58	3.91	2.69	3.41	3.33
ENSG00000088926	F11	coagulation factor XI	0	0	0	0	0	0
ENSG00000088930	XRN2	5'-3' exoribonuclease 2	48.4	47.02	45.84	46.28	48.83	50.3
ENSG00000088970	KIZ	kizuna centrosomal protein	11.38	8.98	31.14	6.28	11.61	38.59
ENSG00000088986	DYNLL1	dynein light chain LC8-type 1	597.22	599.17	449.93	595.5	594.05	506.25
ENSG00000088992	TESC	tescalcin	0	0	0	0	0	0
ENSG00000089006	SNX5	sorting nexin 5	87.81	72.21	60.78	88.75	83.68	73.71
ENSG00000089009	RPL6	ribosomal protein L6	1817.18	1469.74	1568.09	1262.16	1294.11	1563.4
ENSG00000089012	SIRPG	signal regulatory protein gamma	0	0	0	0	0	0
ENSG00000089022	MAPKAPK5	MAPK activated protein kinase 5	22.25	23.38	19.26	20.29	18.79	14.34
ENSG00000089041	P2RX7	purinergic receptor P2X 7	1.77	0.65	2.15	0.99	2.77	1.73
ENSG00000089048	ESF1	ESF1 nucleolar pre-rRNA processing protein homolog	13.53	10.09	9.44	13.61	10.6	9.3
ENSG00000089050	RBBP9	RB binding protein 9, serine hydrolase	16.31	11.46	7.68	10.17	18.02	9.8
ENSG00000089053	ANAPC5	anaphase promoting complex subunit 5	107.54	67.43	62.33	86.97	78.39	76.9
ENSG00000089057	SLC23A2	solute carrier family 23 member 2	13.81	14.78	16.68	15.24	14.17	19.32
ENSG00000089060	SLC8B1	solute carrier family 8 member B1	9.74	13.08	14.65	8.66	9.79	11.35
ENSG00000089063	TMEM230	transmembrane protein 230	181.45	164.91	150.16	129.8	148.19	156.64
ENSG00000089091	DZANK1	double zinc ribbon and ankyrin repeat domains 1	2.45	0.89	0.79	2.99	2.18	0.85
ENSG00000089094	KDM2B	lysine demethylase 2B	9.91	11.3	11	10.96	10.31	9.29
ENSG00000089101	CFAP61	cilia and flagella associated protein 61	0	0	0	0	0	0
ENSG00000089116	LHX5	LIM homeobox 5	0	0	0	0	0	0
ENSG00000089123	TASP1	taspase 1	4.11	2.39	3.61	3.26	5.66	5.06
ENSG00000089127	OAS1	2'-5'-oligoadenylate synthetase 1	5.35	9.96	28.67	21.65	22.8	8.07
ENSG00000089154	GCN1	GCN1 activator of EIF2AK4	31.34	27.95	19.54	42.12	25.97	28.79
ENSG00000089157	RPLP0	ribosomal protein lateral stalk subunit P0	2252.5	2765.34	2875.36	2337.9	2838.42	2944.69
ENSG00000089159	PXN	paxillin	173.87	168.65	120.78	189.73	165.8	114.62
ENSG00000089163	SIRT4	sirtuin 4	1.5	1.33	2.3	0.48	1.18	1.32
ENSG00000089169	RPH3A	rabphilin 3A	0	0	0	0	0	0
ENSG00000089177	KIF16B	kinesin family member 16B	5.25	5.19	6.77	6.85	6.26	4.26
ENSG00000089195	TRMT6	tRNA methyltransferase 6	13.7	9.35	6.1	16.01	9.05	6.16
ENSG00000089199	CHGB	chromogranin B	0	0	0.29	0.35	0.07	0.25
ENSG00000089220	PEBP1	phosphatidylethanolamine binding protein 1	224.88	223.57	223.28	234.58	294.08	254.98
ENSG00000089225	TBX5	T-box transcription factor 5	2.35	1.78	2.08	2.82	3.08	3.42
ENSG00000089234	BRAP	BRCA1 associated protein	11.32	8.69	8.5	12.01	10.09	8.59
ENSG00000089248	ERP29	endoplasmic reticulum protein 29	94.4	111.86	148.5	97.18	117.38	145.04
ENSG00000089250	NOS1	nitric oxide synthase 1	0.04	0	0	0.14	0.34	0
ENSG00000089280	FUS	FUS RNA binding protein	278.33	259	122.35	445.19	361.93	180.07
ENSG00000089289	IGBP1	immunoglobulin binding protein 1	51.02	42.45	72.37	33.92	39.43	59.7
ENSG00000089327	FXYD5	FXYD domain containing ion transport regulator 5	364.97	348.16	283.94	333.33	301.7	257.02
ENSG00000089335	ZNF302	zinc finger protein 302	16.1	13.06	17.17	14.78	14.39	16.08
ENSG00000089351	GRAMD1A	GRAM domain containing 1A	41.69	42.8	44.12	40.75	37.25	39.47
ENSG00000089356	FXYD3	FXYD domain containing ion transport regulator 3	0	0	0.3	0	0.15	0.78
ENSG00000089472	HEPH	hephaestin	34.92	27.94	31.99	11.5	23.59	36.64
ENSG00000089486	CDIP1	cell death inducing p53 target 1	12.77	9.55	13.88	18.68	14.18	21.38
ENSG00000089505	CMTM1	CKLF like MARVEL transmembrane domain containing 1	2.84	4.36	4.28	2.5	4.07	0.77
ENSG00000089558	KCNH4	potassium voltage-gated channel subfamily H member 4	0	0	0	0	0.09	0
ENSG00000089597	GANAB	glucosidase II alpha subunit	241.96	271.17	301.22	303.49	287.78	330.76
ENSG00000089639	GMIP	GEM interacting protein	4.67	7.09	2.72	10.6	3.72	4.23
ENSG00000089682	RBM41	RNA binding motif protein 41	6.62	5	7.68	6.57	7.3	6.02
ENSG00000089685	BIRC5	baculoviral IAP repeat containing 5	46.38	51.07	4.61	50.73	74.84	13.97
ENSG00000089692	LAG3	lymphocyte activating 3	0.98	0.4	0.57	1.25	0.44	0.64
ENSG00000089693	MLF2	myeloid leukemia factor 2	179.14	199.05	157.91	297.48	241.69	170.81
ENSG00000089723	OTUB2	OTU deubiquitinase, ubiquitin aldehyde binding 2	1.11	0.48	0.65	0.44	0.65	0.62
ENSG00000089737	DDX24	DEAD-box helicase 24	143.84	90.12	109.25	132.91	104.61	101.39
ENSG00000089775	ZBTB25	zinc finger and BTB domain containing 25	5.76	3.26	5.58	4.54	6.04	8.2
ENSG00000089818	NECAP1	NECAP endocytosis associated 1	19.43	32.5	17.97	31	21.46	20.13
ENSG00000089820	ARHGAP4	Rho GTPase activating protein 4	1.53	0	0.74	0.8	0.3	1.27
ENSG00000089847	ANKRD24	ankyrin repeat domain 24	0.42	0.15	0.66	0.76	0.09	0.34
ENSG00000089876	DHX32	DEAH-box helicase 32 (putative)	19.42	19.68	14.32	16.59	19.89	17.82
ENSG00000089902	RCOR1	REST corepressor 1	12.48	11.03	9.29	15.34	14.44	11.05
ENSG00000089916	GPATCH2L	G-patch domain containing 2 like	9.01	4.18	4.49	15.93	6.89	7.26
ENSG00000090006	LTBP4	latent transforming growth factor beta binding protein 4	34.76	57.88	77.77	69.49	57.95	89.84
ENSG00000090013	BLVRB	biliverdin reductase B	79.18	129.17	177.81	79.28	104.14	103.88
ENSG00000090020	SLC9A1	solute carrier family 9 member A1	21.12	27.39	20.72	27.47	23.39	17.76
ENSG00000090054	SPTLC1	serine palmitoyltransferase long chain base subunit 1	71.26	53.77	50.28	55.93	65.34	59.58
ENSG00000090060	PAPOLA	poly(A) polymerase alpha	82.25	66.39	62.64	64.86	66.23	66.84
ENSG00000090061	CCNK	cyclin K	40.17	34.76	36.13	41.11	36.28	29.14
ENSG00000090097	PCBP4	poly(rC) binding protein 4	46.01	51.17	37.25	57.04	47.24	49.67
ENSG00000090104	RGS1	regulator of G protein signaling 1	0	0	0	0.14	0	0.37
ENSG00000090238	YPEL3	yippee like 3	71.91	92.66	177.43	80.9	97.72	204.79
ENSG00000090263	MRPS33	mitochondrial ribosomal protein S33	63.19	54.53	47.14	84.36	58.45	58.21
ENSG00000090266	NDUFB2	NADH:ubiquinone oxidoreductase subunit B2	306.01	444.7	347.87	487.47	469.18	405.1
ENSG00000090273	NUDC	nuclear distribution C, dynein complex regulator	72.99	86.81	54.7	96.44	92.51	59.54
ENSG00000090316	MAEA	macrophage erythroblast attacher, E3 ubiquitin ligase	69.05	64.03	58.86	73.02	72.27	70.54
ENSG00000090339	ICAM1	intercellular adhesion molecule 1	3.72	7.14	9.31	2.62	1.68	4.99
ENSG00000090372	STRN4	striatin 4	54.26	50.53	35.3	56.63	45.84	41.39
ENSG00000090376	IRAK3	interleukin 1 receptor associated kinase 3	6.75	5.89	6.22	6.06	8.13	7.59
ENSG00000090382	LYZ	lysozyme	0	0	0	0.13	0	0
ENSG00000090402	SI	sucrase-isomaltase	0	0	0	0	0	0
ENSG00000090432	MUL1	mitochondrial E3 ubiquitin protein ligase 1	22.65	24.62	22.08	28.12	27.28	27.59
ENSG00000090447	TFAP4	transcription factor AP-4	5.37	11.31	8.98	6.82	7.43	5.5
ENSG00000090470	PDCD7	programmed cell death 7	14.8	33.14	17.67	18.01	24.11	17.36
ENSG00000090487	SPG21	SPG21 abhydrolase domain containing, maspardin	93.15	80.23	126.66	67.6	68.19	106.4
ENSG00000090512	FETUB	fetuin B	0	0	0	0	0.21	0
ENSG00000090520	DNAJB11	DnaJ heat shock protein family (Hsp40) member B11	56.98	57.47	29.78	69.69	50.72	46.84
ENSG00000090530	P3H2	prolyl 3-hydroxylase 2	9.07	6.09	3.21	73.1	56.11	10.19
ENSG00000090534	THPO	thrombopoietin	0.43	0.3	0.77	0.5	0.39	0.16
ENSG00000090539	CHRD	chordin	1.58	2.24	6.92	0.79	1.66	2.47
ENSG00000090554	FLT3LG	fms related receptor tyrosine kinase 3 ligand	14.95	27.74	45.23	19.47	17.72	27.2
ENSG00000090565	RAB11FIP3	RAB11 family interacting protein 3	22.64	34.26	25.55	23.8	24.03	26.49
ENSG00000090581	GNPTG	N-acetylglucosamine-1-phosphate transferase subunit gamma	70.03	80.77	102.91	74.39	69.59	87.82
ENSG00000090612	ZNF268	zinc finger protein 268	5.45	7.26	6.91	8.4	5.92	8.2
ENSG00000090615	GOLGA3	golgin A3	30.85	38.58	25.52	49.02	32.25	29.97
ENSG00000090621	PABPC4	poly(A) binding protein cytoplasmic 4	196.09	171.44	189.67	157.93	170.49	168.81
ENSG00000090659	CD209	CD209 molecule	0	0	0	0	0	0
ENSG00000090661	CERS4	ceramide synthase 4	11.69	27.08	25.41	11.96	23.63	26.89
ENSG00000090674	MCOLN1	mucolipin 1	26.26	25.42	31.18	43.15	23.13	26.15
ENSG00000090686	USP48	ubiquitin specific peptidase 48	27.99	25.98	21.74	28.85	29.81	22.78
ENSG00000090776	EFNB1	ephrin B1	11.25	14.1	17.88	14.26	10.29	15.43
ENSG00000090857	PDPR	pyruvate dehydrogenase phosphatase regulatory subunit	10.03	12.17	12.28	12.6	10.77	14.28
ENSG00000090861	AARS1	alanyl-tRNA synthetase 1	69.8	64.4	74.72	78.79	74.63	68.43
ENSG00000090863	GLG1	golgi glycoprotein 1	111.8	117.57	154.08	111.78	106.12	152.75
ENSG00000090889	KIF4A	kinesin family member 4A	12.57	11.69	1.28	14.38	17.97	4.17
ENSG00000090905	TNRC6A	trinucleotide repeat containing adaptor 6A	20.04	19.53	22.51	24.95	33.4	18.51
ENSG00000090924	PLEKHG2	pleckstrin homology and RhoGEF domain containing G2	10.79	11.06	13.12	30.39	11.44	9.52
ENSG00000090932	DLL3	delta like canonical Notch ligand 3	0.18	0.21	0.08	0.27	0.09	0.16
ENSG00000090971	NAT14	N-acetyltransferase 14 (putative)	15.64	23.55	15.23	41.22	24.1	20.96
ENSG00000090975	PITPNM2	phosphatidylinositol transfer protein membrane associated 2	8.7	7.31	6.11	10.33	10.29	13.83
ENSG00000090989	EXOC1	exocyst complex component 1	33.31	21.87	24.85	21.29	19.36	22.56
ENSG00000091009	RBM27	RNA binding motif protein 27	7.75	7.51	5.21	6.09	7.14	6.4
ENSG00000091010	POU4F3	POU class 4 homeobox 3	0	0.08	0.07	0	0	0
ENSG00000091039	OSBPL8	oxysterol binding protein like 8	38.38	30.12	60.67	25.46	27.45	27.4
ENSG00000091073	DTX2	deltex E3 ubiquitin ligase 2	18.36	16.73	9.18	31.38	22.23	19.34
ENSG00000091106	NLRC4	NLR family CARD domain containing 4	0.52	0.12	0.1	0.1	0.1	0.15
ENSG00000091127	PUS7	pseudouridine synthase 7	14.42	8.68	5.85	9.21	8.74	9.32
ENSG00000091128	LAMB4	laminin subunit beta 4	0	0	0	0	0	0.06
ENSG00000091129	NRCAM	neuronal cell adhesion molecule	0.18	0	0.18	0.11	1.1	0.45
ENSG00000091136	LAMB1	laminin subunit beta 1	153.14	153.29	231.86	150.21	128.86	264.9
ENSG00000091137	SLC26A4	solute carrier family 26 member 4	0.18	0	0.06	2.32	0.34	0.09
ENSG00000091138	SLC26A3	solute carrier family 26 member 3	0	0	0	0	0	0
ENSG00000091140	DLD	dihydrolipoamide dehydrogenase	119.06	100.76	45.08	155.56	106.07	75.72
ENSG00000091157	WDR7	WD repeat domain 7	7.42	9.14	3.98	9.92	9.45	7.87
ENSG00000091164	TXNL1	thioredoxin like 1	85.66	70.48	73.15	65	71.42	78.79
ENSG00000091181	IL5RA	interleukin 5 receptor subunit alpha	0	0	0	0	0	0
ENSG00000091262	ABCC6	ATP binding cassette subfamily C member 6	0.03	0	0.2	0.2	0.62	0.54
ENSG00000091317	CMTM6	CKLF like MARVEL transmembrane domain containing 6	74.57	56.43	46.92	43.63	40.41	41.06
ENSG00000091409	ITGA6	integrin subunit alpha 6	6.8	8.15	0.9	8.88	22.22	9.93
ENSG00000091428	RAPGEF4	Rap guanine nucleotide exchange factor 4	0.05	0	0.09	0.16	0.83	0.04
ENSG00000091436	MAP3K20	mitogen-activated protein kinase kinase kinase 20	41.06	31.97	41.74	33.22	43.82	40.76
ENSG00000091482	SMPX	small muscle protein X-linked	0	0	0	0	0	0
ENSG00000091483	FH	fumarate hydratase	72.24	66.77	42.3	69.4	68.11	54.42
ENSG00000091490	SEL1L3	SEL1L family member 3	8.5	3.95	1.04	7.61	6.34	4.84
ENSG00000091513	TF	transferrin	1.31	0	0.02	0.05	0	0.45
ENSG00000091527	CDV3	CDV3 homolog	124.6	98.92	89.07	104.81	97.57	94.44
ENSG00000091536	MYO15A	myosin XVA	1.94	1.3	1.75	5.2	4.03	2.34
ENSG00000091542	ALKBH5	alkB homolog 5, RNA demethylase	54.39	54.93	58.22	67.71	69.62	67.99
ENSG00000091583	APOH	apolipoprotein H	0	0	0	0	0	0
ENSG00000091592	NLRP1	NLR family pyrin domain containing 1	11.09	11.9	14.21	19.56	12.64	16.89
ENSG00000091622	PITPNM3	PITPNM family member 3	1.42	2.4	0.65	7.29	4.84	3.42
ENSG00000091640	SPAG7	sperm associated antigen 7	88.85	85.57	88.48	124.12	84.6	88.12
ENSG00000091651	ORC6	origin recognition complex subunit 6	20.04	17.76	2.11	23.26	22.84	4.09
ENSG00000091656	ZFHX4	zinc finger homeobox 4	7.21	7.86	6.45	4.4	4.33	6.73
ENSG00000091664	SLC17A6	solute carrier family 17 member 6	0	0	0	0	0	0
ENSG00000091704	CPA1	carboxypeptidase A1	0	0	0.51	0.95	0	0
ENSG00000091732	ZC3HC1	zinc finger C3HC-type containing 1	13.34	14.84	10.13	21.64	20.47	13.58
ENSG00000091831	ESR1	estrogen receptor 1	2	0.56	2.52	2.37	0.96	0.63
ENSG00000091844	RGS17	regulator of G protein signaling 17	3.55	2.95	0.73	1.51	1.76	1.15
ENSG00000091879	ANGPT2	angiopoietin 2	1.41	3.28	1.51	0.3	0.29	0.08
ENSG00000091947	TMEM101	transmembrane protein 101	24.26	33.85	28.67	33.02	24.75	32.55
ENSG00000091972	CD200	CD200 molecule	0.29	0	0.09	0	0	0
ENSG00000091986	CCDC80	coiled-coil domain containing 80	270.4	284.09	846.06	332.95	585.44	1032.73
ENSG00000092009	CMA1	chymase 1	0	0	0	0	0	0
ENSG00000092010	PSME1	proteasome activator subunit 1	132.56	168.5	192.29	145.95	150.02	166.88
ENSG00000092020	PPP2R3C	protein phosphatase 2 regulatory subunit B''gamma	36.88	32.99	30.25	25.04	31.19	29.82
ENSG00000092036	HAUS4	HAUS augmin like complex subunit 4	30.87	32.2	26.45	35.98	27.62	21.67
ENSG00000092051	JPH4	junctophilin 4	0	0	0	0	0.19	0
ENSG00000092054	MYH7	myosin heavy chain 7	0	0	0	0	0	0
ENSG00000092067	CEBPE	CCAAT enhancer binding protein epsilon	0	0	0.25	0.12	0.12	0.11
ENSG00000092068	SLC7A8	solute carrier family 7 member 8	8.57	9.74	37.1	49.22	46.65	26.39
ENSG00000092094	OSGEP	O-sialoglycoprotein endopeptidase	16.88	17.63	11.69	21.25	17.36	15.43
ENSG00000092096	SLC22A17	solute carrier family 22 member 17	12.51	17.4	19.18	13.83	14.82	19.66
ENSG00000092098	RNF31	ring finger protein 31	29	44.45	42.02	44.02	31.66	25.61
ENSG00000092108	SCFD1	sec1 family domain containing 1	70.82	53.99	57.3	72.01	61.39	49.91
ENSG00000092140	G2E3	G2/M-phase specific E3 ubiquitin protein ligase	8.31	10.03	2.98	8.31	9.14	3.42
ENSG00000092148	HECTD1	HECT domain E3 ubiquitin protein ligase 1	128.01	103.6	84.67	86.81	81.93	83.8
ENSG00000092199	HNRNPC	heterogeneous nuclear ribonucleoprotein C	447.09	432.03	311.02	472.41	504	394.66
ENSG00000092200	RPGRIP1	RPGR interacting protein 1	0	0	0	0	0	0
ENSG00000092201	SUPT16H	SPT16 homolog, facilitates chromatin remodeling subunit	61.31	61.63	42.11	70.35	67.24	45.99
ENSG00000092203	TOX4	TOX high mobility group box family member 4	33	36.05	30.57	56.65	37.07	40.48
ENSG00000092208	GEMIN2	gem nuclear organelle associated protein 2	12.48	9.11	4.63	4.98	6.85	3.08
ENSG00000092295	TGM1	transglutaminase 1	0.36	0.22	0.12	0.93	0.19	1.19
ENSG00000092330	TINF2	TERF1 interacting nuclear factor 2	34.12	40.29	37.78	43.94	42.93	33.42
ENSG00000092345	DAZL	deleted in azoospermia like	0.32	0	0	0.33	0	0
ENSG00000092377	TBL1Y	transducin beta like 1 Y-linked	0	0	0	0	0	0
ENSG00000092421	SEMA6A	semaphorin 6A	0.73	0.56	1.15	1.32	1.25	0.55
ENSG00000092439	TRPM7	transient receptor potential cation channel subfamily M member 7	25.29	22.06	21.81	16.68	17.71	19.46
ENSG00000092445	TYRO3	TYRO3 protein tyrosine kinase	28.67	23.18	12.69	16.22	19.04	26.82
ENSG00000092470	WDR76	WD repeat domain 76	11.64	11.42	1.64	14.67	19.02	4.26
ENSG00000092529	CAPN3	calpain 3	9.76	4.57	5.86	6.55	2.5	5.03
ENSG00000092531	SNAP23	synaptosome associated protein 23	33.81	24.24	31.68	31.62	29.6	36.1
ENSG00000092607	TBX15	T-box transcription factor 15	20.6	17.77	10.24	37.7	29.52	28.77
ENSG00000092621	PHGDH	phosphoglycerate dehydrogenase	53.63	56.05	66.57	59.66	57.13	33.98
ENSG00000092758	COL9A3	collagen type IX alpha 3 chain	0.49	2.49	4.49	1.61	3.37	5.49
ENSG00000092820	EZR	ezrin	19.66	27.74	7.82	47.67	55.44	18.01
ENSG00000092841	MYL6	myosin light chain 6	1956.77	2319.73	1882.83	2621.63	2377.81	2234.11
ENSG00000092847	AGO1	argonaute RISC component 1	7.32	8.48	6.22	8.27	8.27	6.51
ENSG00000092850	TEKT2	tektin 2	0	0	0	0	0	0.11
ENSG00000092853	CLSPN	claspin	6.78	16.41	0.56	10.25	13.85	2.32
ENSG00000092871	RFFL	ring finger and FYVE like domain containing E3 ubiquitin protein ligase	4	7.45	7.29	10.67	9.6	7.56
ENSG00000092929	UNC13D	unc-13 homolog D	0.4	0	1.58	0.49	0.05	0.91
ENSG00000092931	MFSD11	major facilitator superfamily domain containing 11	24.89	22.09	20.29	30.25	17.39	20.33
ENSG00000092964	DPYSL2	dihydropyrimidinase like 2	75.5	67.03	96.41	61.49	58.98	102.89
ENSG00000092969	TGFB2	transforming growth factor beta 2	3.25	1.35	20.05	4	5.54	17.47
ENSG00000092978	GPATCH2	G-patch domain containing 2	4.53	4.09	3.85	4.52	5.26	4
ENSG00000093000	NUP50	nucleoporin 50	26.37	27.66	11.25	36.07	37.2	14.51
ENSG00000093009	CDC45	cell division cycle 45	12.34	14.23	0.66	18.86	27.65	2.26
ENSG00000093010	COMT	catechol-O-methyltransferase	171.3	186.65	237.82	274.22	166.35	234.97
[truncated: 58,812 more rows]
